# Supplementary material for: A Genome-Wide Survey of Switchgrass Genome Structure and Organization
Source: PLoS One. 2012 Apr 12;7(4):e33892. doi: 10.1371/journal.pone.0033892 (PMC3325252; doi:10.1371/journal.pone.0033892)
Supplement: File S7 — List of switchgrass gene models with their corresponding orthologs from rice, sorghum, maize and Brachypodium . (XLS) [file pone.0033892.s008.xls]

## Sheet: PV_models_besthit_Brachy-1e-10.
Supplemental file S7. List of switchgrass gene models with their corresponding orthologs from rice, sorghum, maize and Brachypodium
ModelID	LocusID	Strand	Peptide Length	Rice Blast Besthit	E value	Annotation	Sorghum Blast Besthit	E value	Annotation	Maize Blast Besthit	E value	Annotation	Brachypodium Blast Besthit	E value	Annotation
AC243215.m00001	AC243215.t00001	+	29
AC243216.m00001	AC243216.t00001	+	188	LOC_Os11g08380.1	1e-48	1-aminocyclopropane-1-carboxylate oxidase, putative, expressed	Sb05g005710.1	3e-51	1-aminocyclopropane-1-carboxylate oxidase, putative / ACC oxidase, putative	GRMZM5G854264_P01	2e-51		Bradi4g23500.1	5e-48	1-aminocyclopropane-1-carboxylate oxidase, putative / ACC oxidase, putative
AC243216.m00002	AC243216.t00002	-	245	LOC_Os04g24040.1	4e-27	retrotransposon protein, putative, Ty3-gypsy subclass, expressed
AC243216.m00003	AC243216.t00003	-	221	LOC_Os04g37790.2	4e-44	expressed protein	Sb06g018430.1	1e-49	unknown protein	GRMZM2G703021_P01	1e-45	hypothetical protein LOC100384264	Bradi5g11930.1	6e-38	unknown protein
AC243216.m00004	AC243216.t00004	-	920	LOC_Os11g08400.1	0	expressed protein	Sb05g005700.1	0	WD-40 repeat family protein	GRMZM2G375856_P01	0		Bradi4g41140.1	1e-146	ARC5 (ACCUMULATION AND REPLICATION OF CHLOROPLAST 5); GTP binding / GTPase
AC243216.m00005	AC243216.t00005	-	457	LOC_Os11g08410.1	3e-26	GATA zinc finger domain containing protein	Sb05g001890.1	1e-32	zinc finger (GATA type) family protein	GRMZM2G025002_P01	3e-26		Bradi4g23550.1	5e-22	zinc finger (GATA type) family protein
AC243216.m00006	AC243216.t00006	+	76	LOC_Os06g48610.1	3e-12	CCT motif family protein, expressed	Sb10g028840.1	2e-11	CIL	GRMZM2G064050_P01	4e-12	hypothetical protein LOC100384273	Bradi1g34060.1	7e-12	CIL
AC243216.m00007	AC243216.t00007	-	150	LOC_Os06g02480.1	3e-11	expressed protein	Sb10g001250.1	1e-12	unknown protein	GRMZM2G095211_P01	3e-12
AC243217.m00001	AC243217.t00001	-	450	LOC_Os09g36320.1	1e-22	tyrosine protein kinase domain containing protein, putative, expressed	Sb02g030970.1	9e-30	protein kinase, putative	GRMZM5G879570_P02	3e-30	LOC100280671	Bradi4g36140.1	2e-24	protein kinase, putative
AC243217.m00002	AC243217.t00002	-	983				Sb0013s006040.1	1e-13	ATCEN2 (CENTRIN2); calcium ion binding
AC243217.m00003	AC243217.t00003	-	176	LOC_Os09g36340.1	5e-52	HVA22, putative, expressed	Sb04g001756.1	8e-43	abscisic acid-responsive HVA22 family protein	GRMZM2G365613_P01	9e-51		Bradi1g68000.2	3e-43
AC243217.m00004	AC243217.t00004	-	535	LOC_Os09g36350.1	2e-134	endoglucanase, putative, expressed	Sb02g030990.1	1e-146	AtGH9B7 (Arabidopsis thaliana glycosyl hydrolase 9B7); catalytic/ hydrolase, hydrolyzing O-glycosyl compounds	GRMZM2G147422_P01	2e-147	hypothetical protein LOC100279256	Bradi4g36240.1	2e-105	AtGH9B7 (Arabidopsis thaliana glycosyl hydrolase 9B7); catalytic/ hydrolase, hydrolyzing O-glycosyl compounds
AC243217.m00005	AC243217.t00004	-	742	LOC_Os09g36350.1	0	endoglucanase, putative, expressed	Sb02g030990.1	0	AtGH9B7 (Arabidopsis thaliana glycosyl hydrolase 9B7); catalytic/ hydrolase, hydrolyzing O-glycosyl compounds	GRMZM2G147422_P01	0	hypothetical protein LOC100279256	Bradi4g36240.1	0	AtGH9B7 (Arabidopsis thaliana glycosyl hydrolase 9B7); catalytic/ hydrolase, hydrolyzing O-glycosyl compounds
AC243217.m00006	AC243217.t00005	-	450	LOC_Os09g36360.1	8e-114	protein of unknown function containing protein, expressed	Sb02g031000.1	5e-124	unknown protein	GRMZM2G147454_P01	8e-113	hypothetical protein LOC100277586	Bradi4g36250.1	1e-108	unknown protein
AC243217.m00007	AC243217.t00006	+	272	LOC_Os08g43470.1	7e-151	ER lumen protein retaining receptor, putative, expressed	Sb02g031010.1	3e-156	ER lumen protein retaining receptor family protein	GRMZM2G147459_P01	2e-155	LOC100284075	Bradi4g36280.1	5e-156	ER lumen protein retaining receptor family protein
AC243217.m00008	AC243217.t00007	+	290	LOC_Os09g36440.1	1e-142	transcription initiation factor IIB, putative, expressed	Sb02g031020.1	4e-144	transcription initiation factor IIB-2 / general transcription factor TFIIB-2 (TFIIB2)	GRMZM2G002828_P01	1e-140	transcription initiation factor IIB	Bradi4g36290.1	2e-141	transcription initiation factor IIB-2 / general transcription factor TFIIB-2 (TFIIB2)
AC243217.m00009	AC243217.t00007	+	312	LOC_Os09g36440.1	0	transcription initiation factor IIB, putative, expressed	Sb02g031020.1	0	transcription initiation factor IIB-2 / general transcription factor TFIIB-2 (TFIIB2)	GRMZM2G091586_P03	0	hypothetical protein LOC100193219	Bradi4g36290.1	0	transcription initiation factor IIB-2 / general transcription factor TFIIB-2 (TFIIB2)
AC243217.m00010	AC243217.t00008	-	277	LOC_Os09g36450.2	7e-44	triosephosphate isomerase, chloroplast precursor, putative, expressed	Sb02g031030.1	8e-43	TIM (TRIOSEPHOSPHATE ISOMERASE); catalytic/ triose-phosphate isomerase	GRMZM5G852968_P03	8e-48	hypothetical protein LOC100191222	Bradi4g36310.1	1e-43	TIM (TRIOSEPHOSPHATE ISOMERASE); catalytic/ triose-phosphate isomerase
AC243217.m00011	AC243217.t00009	-	140	LOC_Os02g26850.1	3e-12	rRNA-processing protein FCF, putative, expressed	Sb02g031040.1	4e-13	MEE21 (maternal effect embryo arrest 21)	GRMZM2G135782_P02	1e-11	hypothetical protein LOC100272500	Bradi3g56710.1	8e-13	MEE21 (maternal effect embryo arrest 21)
AC243217.m00012	AC243217.t00010	-	93	LOC_Os02g26850.1	4e-30	rRNA-processing protein FCF, putative, expressed	Sb02g031040.1	2e-42	MEE21 (maternal effect embryo arrest 21)	GRMZM2G135782_P02	4e-43	hypothetical protein LOC100272500	Bradi3g56710.1	2e-33	MEE21 (maternal effect embryo arrest 21)
AC243217.m00013	AC243217.t00011	+	107
AC243217.m00014	AC243217.t00012	+	332	LOC_Os09g36480.1	1e-161	XAP5 family protein, putative, expressed	Sb02g031060.1	6e-164	XCT (XAP5 CIRCADIAN TIMEKEEPER)	GRMZM2G050714_P01	2e-163	hypothetical protein LOC100279523	Bradi4g36330.2	6e-158
AC243217.m00015	AC243217.t00012	+	333	LOC_Os09g36480.1	2e-163	XAP5 family protein, putative, expressed	Sb02g031060.1	7e-164	XCT (XAP5 CIRCADIAN TIMEKEEPER)	GRMZM2G050714_P01	2e-163	hypothetical protein LOC100279523	Bradi4g36330.2	8e-160
AC243217.m00016	AC243217.t00013	+	126	LOC_Os09g36490.1	1e-18	expressed protein	Sb02g031070.1	3e-25		GRMZM2G150674_P01	2e-17	collagen, type IV, alpha 5
AC243217.m00017	AC243217.t00014	+	227	LOC_Os09g28890.2	1e-21	transposon protein, putative, CACTA, En/Spm sub-class, expressed	Sb07g023250.1	3e-25	DNAJ heat shock N-terminal domain-containing protein	AC225193.3_FGP004	9e-27		Bradi3g38330.1	1e-25	DNAJ heat shock N-terminal domain-containing protein
AC243217.m00018	AC243217.t00015	-	179	LOC_Os04g21840.1	3e-11	expressed protein
AC243217.m00019	AC243217.t00016	-	478	LOC_Os09g36500.1	6e-18	zinc finger, C3HC4 type domain containing protein, expressed	Sb02g031080.1	1e-19	RHA3A; protein binding / zinc ion binding	GRMZM2G449875_P01	9e-21	RING-H2 finger protein ATL2A	Bradi4g36360.1	3e-18	RING1; protein binding / ubiquitin-protein ligase/ zinc ion binding
AC243218.m00001	AC243218.t00001	-	806	LOC_Os11g42630.1	5e-36	retrotransposon protein, putative, Ty3-gypsy subclass				GRMZM2G393157_P01	3e-114
AC243218.m00002	AC243218.t00002	-	476	LOC_Os04g46820.1	1e-22	LTPL121 - Protease inhibitor/seed storage/LTP family protein precursor, putative	Sb06g024780.1	7e-23	protease inhibitor/seed storage/lipid transfer protein (LTP) family protein	GRMZM2G406313_P01	4e-22	cortical cell-delineating protein	Bradi1g78240.1	9e-21	protease inhibitor/seed storage/lipid transfer protein (LTP) family protein
AC243218.m00003	AC243218.t00003	-	91	LOC_Os04g46810.1	1e-16	LTPL120 - Protease inhibitor/seed storage/LTP family protein precursor, expressed	Sb06g024790.1	8e-17	protease inhibitor/seed storage/lipid transfer protein (LTP) family protein	GRMZM2G410338_P01	6e-16	LOC100286225	Bradi1g78250.2	7e-15
AC243218.m00004	AC243218.t00004	-	301
AC243218.m00005	AC243218.t00005	+	97	LOC_Os06g08350.1	3e-20	expressed protein	Sb10g005530.1	5e-21	unknown protein	GRMZM2G008305_P01	5e-21		Bradi1g47450.1	2e-14	unknown protein
AC243218.m00006	AC243218.t00006	-	545	LOC_Os02g44680.1	0	allantoin permease, putative, expressed	Sb04g032390.1	0	permease, cytosine/purines, uracil, thiamine, allantoin family protein	GRMZM2G362848_P01	0	hypothetical protein LOC100216652	Bradi3g51350.1	0	permease, cytosine/purines, uracil, thiamine, allantoin family protein
AC243218.m00007	AC243218.t00007	-	930	LOC_Os02g44670.1	1e-32	harpin-induced protein 1 domain containing protein, expressed	Sb04g032400.1	7e-60	harpin-induced protein-related / HIN1-related / harpin-responsive protein-related	GRMZM2G362904_P01	1e-70		Bradi3g51360.1	6e-20	harpin-induced protein-related / HIN1-related / harpin-responsive protein-related
AC243218.m00008	AC243218.t00008	+	47	LOC_Os02g44642.1	2e-20	STE_MEKK_ste11_MAP3K.10 - STE kinases include homologs to sterile 7, sterile 11 and sterile 20 from yeast, expressed	Sb04g032420.1	1e-22	YDA (YODA); ATP binding / kinase/ protein kinase/ protein serine/threonine kinase	GRMZM2G093316_P02	2e-22	hypothetical protein LOC100381765	Bradi3g51380.1	4e-20	YDA (YODA); ATP binding / kinase/ protein kinase/ protein serine/threonine kinase
AC243218.m00009	AC243218.t00009	+	57
AC243218.m00010	AC243218.t00010	-	289	LOC_Os02g44630.2	8e-156	aquaporin protein, putative, expressed	Sb04g032430.1	4e-159	PIP1;5 (PLASMA MEMBRANE INTRINSIC PROTEIN 1;5); water channel	AC209208.3_FGP002	7e-157	Aquaporin PIP1-2 (Plasma membrane intrinsic protein 1-2)(ZmPIP1-2)(ZmPIP1;2)(ZmPIP1b)	Bradi5g18170.1	3e-149	PIP1;5 (PLASMA MEMBRANE INTRINSIC PROTEIN 1;5); water channel
AC243218.m00011	AC243218.t00011	-	707	LOC_Os02g44610.1	5e-84	protein kinase, putative, expressed	Sb04g032440.1	3e-127	protein kinase family protein / U-box domain-containing protein	GRMZM2G310410_P01	1e-89	hypothetical protein LOC100383603	Bradi3g51400.1	1e-82	protein kinase family protein / U-box domain-containing protein
AC243218.m00012	AC243218.t00012	-	321	LOC_Os02g44610.1	2e-15	protein kinase, putative, expressed	Sb04g032440.1	1e-37	protein kinase family protein / U-box domain-containing protein	GRMZM2G310410_P01	1e-26	hypothetical protein LOC100383603	Bradi3g51400.1	3e-17	protein kinase family protein / U-box domain-containing protein
AC243218.m00013	AC243218.t00013	-	171	LOC_Os06g06760.3	8e-32	protein kinase, putative, expressed	Sb10g004400.1	5e-34	protein kinase family protein / U-box domain-containing protein	GRMZM2G349344_P01	6e-33		Bradi3g51400.1	6e-32	protein kinase family protein / U-box domain-containing protein
AC243219.m00001	AC243219.t00001	+	138	LOC_Os02g18090.1	3e-39	expressed protein	Sb04g011040.1	9e-50	unknown protein	GRMZM2G111022_P01	9e-47	hypothetical protein LOC100276733 (LOC100276733), mRNA	Bradi3g10380.1	1e-43	unknown protein
AC243219.m00002	AC243219.t00002	-	273	LOC_Os02g18070.1	2e-59	NB-ARC domain containing protein, expressed	Sb08g020630.1	1e-70	disease resistance protein (NBS-LRR class), putative	GRMZM2G116335_P01	5e-24	Disease resistance gene analog PIC16 Fragment	Bradi3g10370.1	2e-29	disease resistance protein (NBS-LRR class), putative
AC243219.m00003	AC243219.t00003	+	441	LOC_Os07g44540.1	1e-14	retrotransposon protein, putative, Ty3-gypsy subclass
AC243219.m00004	AC243219.t00004	+	192	LOC_Os02g18090.1	2e-31	expressed protein	Sb04g011040.1	5e-41	unknown protein	GRMZM2G111022_P01	1e-37	hypothetical protein LOC100276733 (LOC100276733), mRNA	Bradi3g10380.1	5e-36	unknown protein
AC243219.m00005	AC243219.t00005	-	590	LOC_Os02g18000.1	2e-176	disease resistance protein RGA2, putative, expressed	Sb08g020630.1	0	disease resistance protein (NBS-LRR class), putative	GRMZM2G116335_P01	3e-76	Disease resistance gene analog PIC16 Fragment	Bradi3g10370.1	7e-113	disease resistance protein (NBS-LRR class), putative
AC243219.m00006	AC243219.t00006	+	177	LOC_Os02g18090.1	7e-35	expressed protein	Sb04g011040.1	1e-45	unknown protein	GRMZM2G111022_P01	2e-42	hypothetical protein LOC100276733 (LOC100276733), mRNA	Bradi3g10380.1	4e-39	unknown protein
AC243220.m00001	AC243220.t00001	+	703	LOC_Os04g43760.1	0	phenylalanine ammonia-lyase, putative, expressed	Sb06g022740.1	0	pal1 (Phe ammonia lyase 1); phenylalanine ammonia-lyase	GRMZM2G441347_P01	0	hypothetical protein LOC100384215	Bradi3g49250.2	0
AC243220.m00002	AC243220.t00002	+	573	LOC_Os07g45970.1	4e-21	retrotransposon protein, putative, unclassified	Sb01g008110.1	8e-15	reverse transcriptase, putative / RNA-dependent DNA polymerase, putative	GRMZM2G474853_P01	1e-34		Bradi3g49230.1	7e-13	ADK2 (ADENOSINE KINASE 2); adenosine kinase/ copper ion binding / kinase
AC243220.m00003	AC243220.t00003	+	151	LOC_Os04g43750.2	7e-83	kinase, pfkB family, putative, expressed	Sb06g022730.1	9e-85	ADK2 (ADENOSINE KINASE 2); adenosine kinase/ copper ion binding / kinase	GRMZM2G089767_P01	5e-83		Bradi5g15820.1	1e-81	ADK2 (ADENOSINE KINASE 2); adenosine kinase/ copper ion binding / kinase
AC243220.m00004	AC243220.t00004	-	277	LOC_Os04g43740.1	6e-38	OsSAUR18 - Auxin-responsive SAUR gene family member, expressed	Sb06g022720.1	1e-44	auxin-responsive family protein	GRMZM2G089806_P01	2e-40		Bradi5g15810.1	8e-31	auxin-responsive family protein
AC243220.m00005	AC243220.t00005	+	562	LOC_Os06g26150.1	1e-46	retrotransposon protein, putative, Ty3-gypsy subclass				GRMZM2G393157_P01	2e-103
AC243220.m00006	AC243220.t00006	+	743	LOC_Os04g43730.1	0	OsWAK51 - OsWAK receptor-like protein kinase, expressed	Sb06g022700.1	0	WAK5 (WALL ASSOCIATED KINASE 5); kinase/ protein serine/threonine kinase	GRMZM2G145109_P01	0	hypothetical protein LOC100191438	Bradi5g15800.1	0	WAK3 (wall associated kinase 3); kinase/ protein serine/threonine kinase
AC243220.m00007	AC243220.t00007	+	301	LOC_Os04g43730.1	4e-64	OsWAK51 - OsWAK receptor-like protein kinase, expressed	Sb06g022700.1	9e-76	WAK5 (WALL ASSOCIATED KINASE 5); kinase/ protein serine/threonine kinase	GRMZM2G145045_P01	1e-71		Bradi5g15800.1	2e-59	WAK3 (wall associated kinase 3); kinase/ protein serine/threonine kinase
AC243220.m00008	AC243220.t00008	-	128
AC243220.m00009	AC243220.t00009	+	325	LOC_Os04g43730.1	4e-77	OsWAK51 - OsWAK receptor-like protein kinase, expressed	Sb06g022700.1	4e-109	WAK5 (WALL ASSOCIATED KINASE 5); kinase/ protein serine/threonine kinase	GRMZM2G145045_P01	8e-96		Bradi5g15800.1	3e-93	WAK3 (wall associated kinase 3); kinase/ protein serine/threonine kinase
AC243220.m00010	AC243220.t00010	-	299	LOC_Os02g41580.1	2e-81	CAMK_CAMK_like.14 - CAMK includes calcium/calmodulin depedent protein kinases, expressed	Sb06g022690.1	6e-95	PPCK1 (PHOSPHOENOLPYRUVATE CARBOXYLASE KINASE); kinase/ protein serine/threonine kinase	GRMZM2G049541_P01	7e-93	phosphoenolpyruvate carboxylase kinase 4	Bradi5g15790.1	5e-82	PPCK1 (PHOSPHOENOLPYRUVATE CARBOXYLASE KINASE); kinase/ protein serine/threonine kinase
AC243220.m00011	AC243220.t00011	-	403	LOC_Os02g41520.1	2e-166	glycosyl transferase 8 domain containing protein, putative, expressed	Sb06g022680.1	0	PGSIP6 (PLANT GLYCOGENIN-LIKE STARCH INITIATION PROTEIN 6); transferase, transferring glycosyl groups / transferase, transferring hexosyl groups	GRMZM2G166903_P01	0	hypothetical protein LOC100279618	Bradi5g15780.1	3e-170	PGSIP6 (PLANT GLYCOGENIN-LIKE STARCH INITIATION PROTEIN 6); transferase, transferring glycosyl groups / transferase, transferring hexosyl groups
AC243220.m00012	AC243220.t00012	+	96				Sb06g022670.1	2e-11	unknown protein
AC243220.m00013	AC243220.t00013	+	236	LOC_Os04g43690.2	2e-114	DUF647 domain containing protein, putative, expressed	Sb06g022670.1	1e-121	unknown protein	GRMZM2G030275_P04	5e-121	hypothetical protein LOC100280018	Bradi5g15770.1	2e-117	unknown protein
AC243221.m00001	AC243221.t00001	-	186	LOC_Os12g19960.1	1e-18	retrotransposon, putative, centromere-specific
AC243221.m00002	AC243221.t00002	+	444
AC243221.m00003	AC243221.t00003	+	256							GRMZM2G571942_P01	4e-11
AC243221.m00004	AC243221.t00004	-	397	LOC_Os07g12060.1	3e-14	retrotransposon protein, putative, Ty3-gypsy subclass				AC191380.3_FGP001	4e-53
AC243222.m00001	AC243222.t00001	+	972	LOC_Os12g28210.1	9e-18	retrotransposon, putative, centromere-specific
AC243222.m00002	AC243222.t00002	-	720
AC243222.m00003	AC243222.t00003	+	482	LOC_Os03g42530.1	2e-20	retrotransposon, putative, centromere-specific
AC243222.m00004	AC243222.t00004	-	161	LOC_Os01g34960.1	3e-25	retrotransposon, putative, centromere-specific
AC243223.m00001	AC243223.t00001	-	397	LOC_Os06g23730.1	1e-10	retrotransposon, putative, centromere-specific
AC243223.m00002	AC243223.t00002	+	218
AC243223.m00003	AC243223.t00003	-	266	LOC_Os07g40360.1	3e-55	transposon protein, putative, CACTA, En/Spm sub-class	Sb01g022710.1	2e-40		GRMZM2G411044_P01	6e-43
AC243223.m00004	AC243223.t00004	-	161	LOC_Os01g34960.1	5e-26	retrotransposon, putative, centromere-specific
AC243223.m00005	AC243223.t00005	+	389	LOC_Os06g35140.1	4e-57	MYB family transcription factor, putative, expressed	Sb10g021360.1	1e-58	DNA binding / transcription factor	GRMZM2G333083_P01	4e-65		Bradi3g09160.1	7e-47	DNA binding / transcription factor
AC243224.m00001	AC243224.t00001	-	403	LOC_Os05g26940.1	5e-144	CAMK_KIN1/SNF1/Nim1_like.23 - CAMK includes calcium/calmodulin depedent protein kinases, expressed	Sb09g014000.1	0	SIP4 (SOS3-INTERACTING PROTEIN 4); kinase/ protein kinase	GRMZM2G176519_P01	3e-80	CBL-interacting serine/threonine-protein kinase 11	Bradi1g17810.1	6e-82	CIPK12 (CBL-INTERACTING PROTEIN KINASE 12); ATP binding / kinase/ protein kinase/ protein serine/threonine kinase
AC243224.m00002	AC243224.t00002	+	212	LOC_Os05g27000.1	5e-34	expressed protein	Sb09g014230.1	3e-51	unknown protein	GRMZM2G401830_P01	9e-42	hypothetical protein LOC100278553 (LOC100278553), mRNA	Bradi2g31080.1	6e-29	unknown protein
AC243224.m00003	AC243224.t00003	+	434	LOC_Os09g22230.1	1e-12	retrotransposon protein, putative, Ty3-gypsy subclass				AC191380.3_FGP001	1e-65
AC243225.m00001	AC243225.t00001	-	343	LOC_Os01g17240.1	4e-38	transporter, major facilitator family, putative, expressed	Sb02g032440.1	5e-90	PHT4;5; inorganic phosphate transmembrane transporter	GRMZM2G146240_P01	7e-91	hypothetical protein LOC100276553	Bradi4g37610.1	6e-85	PHT4;5; inorganic phosphate transmembrane transporter
AC243225.m00002	AC243225.t00002	-	385	LOC_Os09g38420.1	7e-64	cysteinyl-tRNA synthetase, putative, expressed	Sb02g032450.1	1e-71	SYCO ARATH; ATP binding / aminoacyl-tRNA ligase/ cysteine-tRNA ligase/ nucleotide binding	GRMZM2G002851_P01	4e-70	hypothetical protein LOC100192902	Bradi4g37620.1	9e-62	SYCO ARATH; ATP binding / aminoacyl-tRNA ligase/ cysteine-tRNA ligase/ nucleotide binding
AC243225.m00003	AC243225.t00003	+	109	LOC_Os09g38440.1	1e-31	ATXR, putative, expressed	Sb02g032470.1	1e-33	ATX2 (ARABIDOPSIS TRITHORAX-LIKE PROTEIN 2); DNA binding / histone methyltransferase(H3-K4 specific)	GRMZM2G409224_P03	1e-32	hypothetical protein LOC100273824	Bradi4g37630.1	9e-26	ATX2 (ARABIDOPSIS TRITHORAX-LIKE PROTEIN 2); DNA binding / histone methyltransferase(H3-K4 specific)
AC243225.m00004	AC243225.t00004	+	121	LOC_Os09g38440.1	1e-61	ATXR, putative, expressed	Sb02g032470.1	9e-67	ATX2 (ARABIDOPSIS TRITHORAX-LIKE PROTEIN 2); DNA binding / histone methyltransferase(H3-K4 specific)	GRMZM2G409224_P03	4e-65	hypothetical protein LOC100273824	Bradi4g37630.2	4e-63
AC243225.m00005	AC243225.t00005	-	486	LOC_Os09g38450.1	2e-171	expressed protein	Sb02g032480.1	0		GRMZM2G146240_P02	0	hypothetical protein LOC100276553	Bradi4g37640.1	5e-176
AC243225.m00006	AC243225.t00006	-	239	LOC_Os09g38500.2	1e-70	mitochondrial glycoprotein, putative, expressed	Sb02g032490.1	1e-74	mitochondrial glycoprotein family protein / MAM33 family protein	GRMZM2G409213_P01	6e-80	hypothetical protein LOC100194246	Bradi4g37650.1	1e-63	mitochondrial glycoprotein family protein / MAM33 family protein
AC243225.m00007	AC243225.t00007	-	725				Sb03g041320.1	3e-95	unknown protein	GRMZM2G148783_P01	3e-64		Bradi4g19690.1	5e-13	unknown protein
AC243225.m00008	AC243225.t00007	-	793	LOC_Os12g32200.1	5e-28	expressed protein	Sb03g041320.1	4e-130	unknown protein	GRMZM2G148783_P01	4e-64		Bradi4g19690.1	7e-33	unknown protein
AC243225.m00009	AC243225.t00008	-	457	LOC_Os09g38510.1	2e-127	purine permease, putative, expressed	Sb02g032510.1	5e-138	ATPUP5; purine transmembrane transporter	GRMZM2G103840_P01	1e-136	ATPUP5	Bradi4g37670.1	4e-111	ATPUP5; purine transmembrane transporter
AC243225.m00010	AC243225.t00009	-	598	LOC_Os09g38520.1	9e-171	DOMON domain containing protein, expressed	Sb02g032520.1	0	DOMON domain-containing protein / dopamine beta-monooxygenase N-terminal domain-containing protein	GRMZM2G041394_P01	0	hypothetical protein LOC100272529	Bradi4g37680.1	6e-171	DOMON domain-containing protein / dopamine beta-monooxygenase N-terminal domain-containing protein
AC243225.m00011	AC243225.t00010	+	544	LOC_Os09g38530.1	0	transmembrane 9 superfamily member, putative, expressed	Sb02g032530.1	0	endomembrane protein 70, putative	GRMZM2G006117_P01	0	transmembrane 9 superfamily protein member 4	Bradi4g37690.1	0	endomembrane protein 70, putative
AC243225.m00012	AC243225.t00011	+	82	LOC_Os09g38540.1	1e-15	plastocyanin-like domain containing protein, putative, expressed	Sb02g032540.1	1e-22	plastocyanin-like domain-containing protein	GRMZM2G485559_P01	9e-19	blue copper protein	Bradi4g37700.1	3e-14	plastocyanin-like domain-containing protein
AC243225.m00013	AC243225.t00012	-	121	LOC_Os09g38550.2	4e-54	protein phosphatase 2C, putative, expressed	Sb10g025800.1	5e-37	protein phosphatase 2C, putative / PP2C, putative	GRMZM2G006416_P01	2e-56	hypothetical protein LOC100382283	Bradi4g37710.2	4e-53
AC243225.m00014	AC243225.t00012	-	130	LOC_Os09g38550.1	4e-56	protein phosphatase 2C, putative, expressed	Sb10g025800.1	8e-37	protein phosphatase 2C, putative / PP2C, putative	GRMZM2G006416_P03	5e-59	hypothetical protein LOC100382283	Bradi4g37710.1	2e-54	protein phosphatase 2C, putative / PP2C, putative
AC243226.m00001	AC243226.t00001	-	522	LOC_Os07g47120.1	0	beta-amylase, putative, expressed	Sb02g042220.1	0	BMY3; beta-amylase/ catalytic/ cation binding	GRMZM2G181284_P01	0	hypothetical protein LOC100383913	Bradi1g18390.1	0	BMY3; beta-amylase/ catalytic/ cation binding
AC243226.m00002	AC243226.t00002	-	373	LOC_Os07g47140.1	4e-90	CCT/B-box zinc finger protein, putative, expressed	Sb02g042230.1	2e-97	zinc finger (B-box type) family protein	GRMZM2G134671_P01	2e-71	hypothetical protein LOC100383648	Bradi1g62420.1	3e-72	zinc finger (B-box type) family protein
AC243226.m00003	AC243226.t00003	-	344	LOC_Os07g47150.2	5e-147	expressed protein	Sb02g042240.2	3e-149		GRMZM2G053434_P02	2e-148	hypothetical protein LOC100192629	Bradi1g18420.1	1e-141	unknown protein
AC243226.m00004	AC243226.t00004	-	371	LOC_Os02g03980.1	3e-32	OsFBX36 - F-box domain containing protein	Sb06g020373.1	3e-65	F-box family protein	GRMZM2G169173_P01	1e-25	F-box domain containing protein	Bradi1g31010.1	2e-28	F-box family protein
AC243226.m00005	AC243226.t00005	+	206	LOC_Os09g31458.1	2e-15	expressed protein	Sb07g027670.1	5e-21	unknown protein	GRMZM2G129405_P01	3e-21	Putative uncharacterized protein	Bradi4g33830.1	2e-12	unknown protein
AC243226.m00006	AC243226.t00006	+	575	LOC_Os07g47180.1	0	transposon protein, putative, unclassified, expressed	Sb02g042260.1	0	protein kinase family protein	GRMZM2G333433_P01	0	hypothetical protein LOC100384249	Bradi1g18450.2	0
AC243226.m00007	AC243226.t00007	+	234	LOC_Os07g47180.1	3e-81	transposon protein, putative, unclassified, expressed	Sb01g035420.1	6e-74	protein kinase family protein	GRMZM2G333433_P01	1e-92	hypothetical protein LOC100384249	Bradi1g22690.1	4e-61	IBS1 (IMPAIRED IN BABA-INDUCED STERILITY 1); ATP binding / kinase/ protein kinase/ protein serine/threonine kinase/ protein tyrosine kinase
AC243226.m00008	AC243226.t00008	+	135	LOC_Os07g47180.1	2e-60	transposon protein, putative, unclassified, expressed	Sb02g042260.1	1e-60	protein kinase family protein	GRMZM5G873277_P01	6e-61		Bradi1g18450.2	1e-58
AC243226.m00009	AC243226.t00009	-	606	LOC_Os09g27040.1	0	GEX1, putative, expressed	Sb02g025930.1	0	GEX1 (GAMETE EXPRESSED PROTEIN 1)	GRMZM2G388045_P01	0	hypothetical protein LOC100382002	Bradi4g31450.1	0	GEX1 (GAMETE EXPRESSED PROTEIN 1)
AC243226.m00010	AC243226.t00010	-	369	LOC_Os07g47210.1	0	GDSL-like lipase/acylhydrolase, putative, expressed	Sb02g042280.1	0	GDSL-motif lipase/hydrolase family protein	GRMZM2G070178_P01	0	anther-specific proline-rich protein APG	Bradi1g18470.1	7e-174	GDSL-motif lipase/hydrolase family protein
AC243226.m00011	AC243226.t00011	-	426	LOC_Os01g23970.1	4e-32	cysteine-rich receptor protein kinase, putative	Sb02g042290.1	4e-89	receptor-like protein kinase, putative	GRMZM2G365282_P01	9e-28		Bradi1g43890.1	3e-37	protein kinase, putative
AC243226.m00012	AC243226.t00012	-	352	LOC_Os04g54020.1	3e-24	receptor-like kinase, putative	Sb02g042290.1	7e-29	receptor-like protein kinase, putative	GRMZM2G177726_P01	1e-19		Bradi1g25740.1	9e-31	S-locus lectin protein kinase family protein
AC243226.m00013	AC243226.t00013	+	503	LOC_Os01g27890.1	1e-154	cytochrome P450, putative, expressed	Sb10g025110.1	1e-138	CYP71B2 (CYTOCHROME P450 71B2); electron carrier/ heme binding / iron ion binding / monooxygenase/ oxygen binding	GRMZM2G306998_P01	1e-169		Bradi2g26490.1	1e-155	CYP71B2 (CYTOCHROME P450 71B2); electron carrier/ heme binding / iron ion binding / monooxygenase/ oxygen binding
AC243226.m00014	AC243226.t00014	-	382	LOC_Os07g47240.1	5e-52	expressed protein	Sb09g006050.1	1e-30	zinc finger (CCCH-type) family protein	GRMZM2G348914_P01	2e-52	hypothetical protein LOC100193688	Bradi2g19270.1	9e-31	ATCTH; transcription factor
AC243226.m00015	AC243226.t00015	+	107	LOC_Os07g47250.3	8e-23	lipase precursor, putative, expressed	Sb02g042310.1	8e-29	lipase class 3 family protein	GRMZM2G047995_P07	2e-26	hypothetical protein LOC100280204	Bradi1g18490.3	1e-23
AC243226.m00016	AC243226.t00016	-	247	LOC_Os07g47270.1	4e-71	protein kinase APK1B, chloroplast precursor, putative, expressed	Sb02g042320.1	2e-73	protein kinase family protein	GRMZM2G048210_P02	2e-71	hypothetical protein LOC100279284	Bradi2g60120.1	2e-70	protein kinase family protein
AC243226.m00017	AC243226.t00017	+	225	LOC_Os07g10860.1	2e-20	conserved hypothetical protein	Sb02g042330.1	2e-99	ATREV3 (ARABIDOPSIS THALIANA RECOVERY PROTEIN 3); DNA binding / DNA-directed DNA polymerase	GRMZM2G081639_P01	9e-70		Bradi1g18510.1	6e-37	ATREV3 (ARABIDOPSIS THALIANA RECOVERY PROTEIN 3); DNA binding / DNA-directed DNA polymerase
AC243226.m00018	AC243226.t00018	+	139				Sb02g042330.1	2e-53	ATREV3 (ARABIDOPSIS THALIANA RECOVERY PROTEIN 3); DNA binding / DNA-directed DNA polymerase	GRMZM2G081639_P01	5e-55		Bradi1g18510.1	3e-41	ATREV3 (ARABIDOPSIS THALIANA RECOVERY PROTEIN 3); DNA binding / DNA-directed DNA polymerase
AC243226.m00019	AC243226.t00019	-	446	LOC_Os07g47290.1	0	xylose isomerase, putative, expressed	Sb02g042340.2	0		GRMZM2G081682_P01	0	hypothetical protein LOC100194128	Bradi1g18550.2	0
AC243226.m00020	AC243226.t00020	+	526	LOC_Os07g47300.1	1e-53	spo0B-associated GTP-binding protein, putative, expressed	Sb02g042350.1	3e-41	GTP1/OBG family protein	GRMZM2G077632_P02	3e-42	hypothetical protein LOC100382114	Bradi1g18570.1	3e-32	GTP1/OBG family protein
AC243227.m00001	AC243227.t00001	-	445	LOC_Os03g24410.1	1e-22	conserved hypothetical protein	Sb08g020680.1	1e-25	unknown protein	GRMZM2G048912_P02	1e-19		Bradi5g02180.1	3e-21	unknown protein
AC243227.m00002	AC243227.t00002	+	235	LOC_Os11g33260.1	1e-37	retrotransposon protein, putative, unclassified, expressed	Sb10g009420.1	7e-25	unknown protein	GRMZM2G155087_P01	1e-46
AC243227.m00003	AC243227.t00003	-	829	LOC_Os02g57490.1	1e-47	DUF260 domain containing protein, putative, expressed	Sb04g037550.1	3e-51	LBD16 (LATERAL ORGAN BOUNDARIES-DOMAIN 16)	GRMZM2G075499_P01	1e-49		Bradi3g55680.1	5e-36	LBD16 (LATERAL ORGAN BOUNDARIES-DOMAIN 16)
AC243227.m00004	AC243227.t00004	-	185	LOC_Os11g07830.1	2e-55	dirigent, putative, expressed	Sb05g005200.1	2e-63	disease resistance-responsive family protein	GRMZM2G320023_P01	2e-38	hypothetical protein LOC100382329	Bradi4g24040.1	1e-54	disease resistance-responsive family protein
AC243227.m00005	AC243227.t00005	-	78
AC243227.m00006	AC243227.t00006	+	153	LOC_Os12g26290.4	3e-30	alpha-DOX2, putative, expressed				GRMZM2G312997_P01	2e-30
AC243227.m00007	AC243227.t00007	-	165	LOC_Os07g42520.1	4e-34	dirigent, putative, expressed	Sb06g020320.1	2e-41	disease resistance-responsive family protein	AC215260.3_FGP001	8e-60	LOC100285709	Bradi1g20970.1	5e-30	disease resistance-responsive family protein
AC243227.m00008	AC243227.t00008	-	499	LOC_Os08g18220.1	0	retrotransposon protein, putative, unclassified	Sb08g010830.1	5e-48		GRMZM2G075618_P01	8e-49		Bradi1g69950.1	8e-92
AC243228.m00001	AC243228.t00001	+	392	LOC_Os12g44370.1	1e-103	expressed protein	Sb08g023300.1	9e-127	unknown protein	GRMZM2G307600_P01	3e-127	hypothetical protein LOC100276924	Bradi4g00300.1	1e-93	unknown protein
AC243228.m00002	AC243228.t00002	-	829	LOC_Os12g44380.1	0	sucrose transporter, putativ, expressed	Sb08g023310.1	0	SUT4 (SUCROSE TRANSPORTER 4); carbohydrate transmembrane transporter/ sucrose transmembrane transporter/ sucrose:hydrogen symporter/ sugar:hydrogen symporter	GRMZM2G307561_P03	0	sucrose transporter4	Bradi4g00320.1	0	SUT4 (SUCROSE TRANSPORTER 4); carbohydrate transmembrane transporter/ sucrose transmembrane transporter/ sucrose:hydrogen symporter/ sugar:hydrogen symporter
AC243228.m00003	AC243228.t00003	-	296	LOC_Os12g44380.3	2e-127	sucrose transporter, putativ, expressed	Sb08g023310.1	2e-122	SUT4 (SUCROSE TRANSPORTER 4); carbohydrate transmembrane transporter/ sucrose transmembrane transporter/ sucrose:hydrogen symporter/ sugar:hydrogen symporter	GRMZM2G307561_P03	5e-123	sucrose transporter4	Bradi4g00320.1	4e-117	SUT4 (SUCROSE TRANSPORTER 4); carbohydrate transmembrane transporter/ sucrose transmembrane transporter/ sucrose:hydrogen symporter/ sugar:hydrogen symporter
AC243228.m00004	AC243228.t00004	-	496	LOC_Os12g44380.2	6e-73	sucrose transporter, putativ, expressed	Sb08g023310.1	4e-74	SUT4 (SUCROSE TRANSPORTER 4); carbohydrate transmembrane transporter/ sucrose transmembrane transporter/ sucrose:hydrogen symporter/ sugar:hydrogen symporter	GRMZM2G307561_P03	3e-73	sucrose transporter4	Bradi4g00320.1	2e-66	SUT4 (SUCROSE TRANSPORTER 4); carbohydrate transmembrane transporter/ sucrose transmembrane transporter/ sucrose:hydrogen symporter/ sugar:hydrogen symporter
AC243228.m00005	AC243228.t00005	+	1532	LOC_Os12g44320.1	0	carbohydrate binding protein, putative, expressed	Sb08g023250.1	0	ATP binding / carbohydrate binding / kinase/ protein kinase/ protein serine/threonine kinase/ protein tyrosine kinase/ sugar binding	AC195785.3_FGP004	0	hypothetical protein LOC100279369	Bradi4g00210.1	2e-165	ATP binding / carbohydrate binding / kinase/ protein kinase/ protein serine/threonine kinase/ protein tyrosine kinase/ sugar binding
AC243228.m00006	AC243228.t00006	+	728	LOC_Os08g31430.1	4e-38	MBTB27 - Bric-a-Brac, Tramtrack, Broad Complex BTB domain with Meprin and TRAF Homology MATH domain, expressed	Sb07g006590.2	1e-31		GRMZM2G077951_P01	6e-78		Bradi3g18350.1	7e-33	BPM2 (BTB-POZ AND MATH DOMAIN 2); protein binding
AC243228.m00007	AC243228.t00007	-	309	LOC_Os12g44310.2	2e-170	carotenoid cleavage dioxygenase, putative, expressed	Sb01g047540.1	0	CCD1 (CAROTENOID CLEAVAGE DIOXYGENASE 1); 9-cis-epoxycarotenoid dioxygenase	GRMZM2G057243_P02	1e-179	white cap1	Bradi4g00330.4	2e-146
AC243228.m00008	AC243228.t00008	-	34	LOC_Os12g44310.1	5e-11	carotenoid cleavage dioxygenase, putative, expressed	Sb01g047540.1	1e-13	CCD1 (CAROTENOID CLEAVAGE DIOXYGENASE 1); 9-cis-epoxycarotenoid dioxygenase	GRMZM2G057243_P02	6e-13	white cap1
AC243228.m00009	AC243228.t00009	-	90	LOC_Os12g44310.1	2e-42	carotenoid cleavage dioxygenase, putative, expressed	Sb01g047540.1	1e-46	CCD1 (CAROTENOID CLEAVAGE DIOXYGENASE 1); 9-cis-epoxycarotenoid dioxygenase	GRMZM2G057243_P02	5e-46	white cap1	Bradi4g00330.4	6e-44
AC243228.m00010	AC243228.t00010	-	163	LOC_Os12g44310.2	9e-65	carotenoid cleavage dioxygenase, putative, expressed	Sb01g047540.1	1e-69	CCD1 (CAROTENOID CLEAVAGE DIOXYGENASE 1); 9-cis-epoxycarotenoid dioxygenase	GRMZM2G057243_P01	1e-69	white cap1	Bradi4g00330.2	1e-69
AC243228.m00011	AC243228.t00011	-	183	LOC_Os03g42520.1	6e-17	expressed protein	Sb08g023230.1	6e-24		GRMZM2G169535_P01	3e-19		Bradi4g00340.1	7e-13	Expressed protein
AC243228.m00012	AC243228.t00012	-	536	LOC_Os03g49150.1	1e-29	yippee zinc-binding protein, putative, expressed	Sb08g023220.1	7e-46	yippee family protein	GRMZM2G169451_P01	8e-44	protein yippee-like	Bradi4g00370.1	1e-38	chx28 (cation/hydrogen exchanger 28); monovalent cation:proton antiporter
AC243228.m00013	AC243228.t00013	-	822	LOC_Os12g44300.1	0	CHX28, putative, expressed	Sb08g023210.1	0	chx28 (cation/hydrogen exchanger 28); monovalent cation:proton antiporter	GRMZM2G457523_P01	0		Bradi4g00370.1	0	chx28 (cation/hydrogen exchanger 28); monovalent cation:proton antiporter
AC243228.m00014	AC243228.t00014	+	398				Sb08g023200.1	4e-70	transcriptional factor B3 family protein	GRMZM2G123461_P01	1e-65		Bradi4g00380.1	8e-47	transcriptional factor B3 family protein
AC243228.m00015	AC243228.t00015	-	222	LOC_Os12g44250.1	4e-92	vesicle-associated membrane protein, putative, expressed	Sb08g023180.1	2e-83	VAMP721 (VESICLE-ASSOCIATED MEMBRANE PROTEIN 721)	GRMZM2G423472_P01	3e-89		Bradi1g54680.1	2e-73	ATVAMP725
AC243228.m00016	AC243228.t00016	-	167	LOC_Os12g44240.1	1e-91	N-acetylglucosaminyltransferase, putative, expressed	Sb08g023170.1	8e-93	glycosyltransferase family 14 protein / core-2/I-branching enzyme family protein	GRMZM2G423476_P01	3e-94		Bradi4g00410.1	2e-91	glycosyltransferase family 14 protein / core-2/I-branching enzyme family protein
AC243229.m00001	AC243229.t00001	-	546	LOC_Os03g15740.1	0	uncharacterized TPR repeat-containing protein, putative, expressed	Sb01g040210.1	0	calcium-binding EF hand family protein	GRMZM2G151564_P01	0	calcium ion binding protein	Bradi1g67270.1	0	calcium-binding EF hand family protein
AC243229.m00002	AC243229.t00002	-	301	LOC_Os03g15730.1	3e-80	S-RNase-binding protein, putative, expressed	Sb01g040220.1	4e-79	SBP1 (s-ribonuclease binding protein 1); protein binding / zinc ion binding	GRMZM2G151576_P01	3e-79	CONSTANS interacting protein 4	Bradi1g67280.1	5e-77	SBP1 (s-ribonuclease binding protein 1); protein binding / zinc ion binding
AC243229.m00003	AC243229.t00003	-	111	LOC_Os03g15720.2	1e-26	expressed protein	Sb01g040230.1	5e-27	glycine-rich protein	GRMZM2G151582_P01	7e-27	hypothetical protein LOC100277047	Bradi1g67290.5	6e-24
AC243229.m00004	AC243229.t00004	+	194	LOC_Os12g36400.1	2e-12	transposon protein, putative, Pong sub-class	Sb02g001280.1	4e-16	DNA binding				Bradi3g03310.1	1e-22	ATGSTT3 (GLUTATHIONE S-TRANSFERASE THETA 3); glutathione transferase
AC243229.m00005	AC243229.t00005	+	222	LOC_Os03g15710.1	2e-92	strictosidine synthase, putative, expressed	Sb01g040240.1	3e-111	strictosidine synthase family protein	GRMZM2G177928_P01	5e-40	strictosidine synthase	Bradi1g67310.1	2e-94	strictosidine synthase family protein
AC243229.m00006	AC243229.t00006	+	207	LOC_Os03g15700.1	2e-56	splicing factor 3A subunit 2, putative, expressed	Sb01g040250.1	4e-58	hydroxyproline-rich glycoprotein family protein	GRMZM2G307906_P01	5e-58	hypothetical protein LOC100273898	Bradi1g67320.1	8e-58	hydroxyproline-rich glycoprotein family protein
AC243229.m00007	AC243229.t00007	-	280	LOC_Os03g15690.1	1e-125	phosphate carrier protein, mitochondrial precursor, putative, expressed	Sb01g040260.1	3e-137	mitochondrial phosphate transporter	GRMZM2G118208_P01	1e-126	Putative uncharacterized protein	Bradi1g67330.1	9e-122	mitochondrial phosphate transporter
AC243229.m00008	AC243229.t00008	-	592	LOC_Os03g15680.1	0	nodulation-signaling pathway 2 protein, putative	Sb01g040270.1	0	scarecrow transcription factor family protein	GRMZM2G055263_P01	0		Bradi1g67340.1	0	scarecrow transcription factor family protein
AC243230.m00001	AC243230.t00001	+	304	LOC_Os02g56840.1	3e-68	OsFBX70 - F-box domain containing protein, expressed	Sb04g036810.1	1e-144	AtPP2-B1 (Phloem protein 2-B1); carbohydrate binding	GRMZM5G862817_P04	4e-66	phloem-specific lectin	Bradi3g55020.1	2e-72	AtPP2-B1 (Phloem protein 2-B1); carbohydrate binding
AC243230.m00002	AC243230.t00002	-	139							GRMZM2G317572_P01	2e-18
AC243230.m00003	AC243230.t00003	-	415	LOC_Os08g44270.1	3e-41	vignain precursor, putative, expressed	Sb07g024430.1	9e-45	cysteine proteinase, putative	GRMZM2G456217_P01	1e-45	LOC100284911	Bradi4g40640.1	1e-39	SAG12 (SENESCENCE-ASSOCIATED GENE 12); cysteine-type peptidase
AC243230.m00004	AC243230.t00004	+	59
AC243230.m00005	AC243230.t00005	-	229	LOC_Os02g13330.1	4e-63	bet v I allergen family protein, putative	Sb10g022200.1	4e-67	Bet v I allergen family protein	GRMZM2G154987_P01	1e-64	hypothetical protein LOC100383950	Bradi1g37810.1	1e-69	Bet v I allergen family protein
AC243230.m00006	AC243230.t00006	-	425	LOC_Os04g43450.1	2e-133	hypothetical protein
AC243230.m00007	AC243230.t00007	-	918	LOC_Os05g10730.2	0	ABC transporter, ATP-binding protein, putative, expressed	Sb10g022190.1	0	ATMRP6; ATPase, coupled to transmembrane movement of substances	GRMZM2G113203_P03	0	multidrug resistance associated protein 1	Bradi1g37830.2	0
AC243231.m00001	AC243231.t00001	-	252
AC243231.m00002	AC243231.t00002	-	118	LOC_Os11g40610.5	2e-34	EARLY flowering protein, putative, expressed	Sb05g025110.1	2e-31	ELF4-L3 (ELF4-Like 3)	GRMZM5G877647_P01	6e-31	hypothetical protein LOC100279754	Bradi4g13230.1	7e-28	ELF4-L4 (ELF4-Like 4)
AC243231.m00003	AC243231.t00003	+	149	LOC_Os11g40600.1	9e-20	expressed protein	Sb05g025080.1	2e-24	SEP1 (STRESS ENHANCED PROTEIN 1); chlorophyll binding	GRMZM2G058447_P01	2e-20	hypothetical protein LOC100277957	Bradi4g13260.1	3e-15	SEP1 (STRESS ENHANCED PROTEIN 1); chlorophyll binding
AC243231.m00004	AC243231.t00004	+	887	LOC_Os11g40590.3	0	DUF1399 containing protein, putative, expressed	Sb05g025070.1	0	glycine-rich protein	GRMZM2G358827_P01	0	Putative uncharacterized protein	Bradi4g13280.1	0	glycine-rich protein
AC243231.m00005	AC243231.t00005	+	279	LOC_Os11g41120.1	9e-27	proline-rich protein, putative, expressed	Sb05g025120.1	2e-33	unknown protein	GRMZM2G123996_P01	2e-30	pistil-specific extensin-like protein	Bradi4g12950.1	3e-25	unknown protein
AC243232.m00001	AC243232.t00001	+	131				Sb01g049400.1	2e-13	HRD (HARDY); DNA binding / transcription activator/ transcription factor
AC243232.m00002	AC243232.t00002	+	175
AC243232.m00003	AC243232.t00003	+	248	LOC_Os03g02660.1	7e-34	expressed protein	Sb01g049390.1	2e-41		GRMZM2G030567_P01	6e-38	hypothetical protein LOC100192905 (LOC100192905), mRNA
AC243232.m00004	AC243232.t00004	+	303	LOC_Os03g02670.2	1e-125	transporter family protein, putative, expressed	Sb01g049360.1	3e-130	UDP-galactose transporter-related	GRMZM2G143187_P01	6e-102		Bradi1g77330.1	9e-123	UDP-galactose transporter-related
AC243232.m00005	AC243232.t00005	+	294	LOC_Os03g02680.2	1e-165	cyclin-dependent kinase A-1, putative, expressed	Sb04g001920.1	1e-144	CDC2 (CELL DIVISION CONTROL 2); cyclin-dependent protein kinase/ kinase/ protein binding / protein kinase	GRMZM2G143213_P02	2e-169	LOC100284730	Bradi1g77330.1	3e-163	UDP-galactose transporter-related
AC243232.m00006	AC243232.t00005	+	248	LOC_Os03g02680.2	4e-139	cyclin-dependent kinase A-1, putative, expressed	Sb04g001920.1	2e-122	CDC2 (CELL DIVISION CONTROL 2); cyclin-dependent protein kinase/ kinase/ protein binding / protein kinase	GRMZM2G008327_P01	3e-141	Cell division control protein 2 homolog (EC 2.7.11.22)(EC 2.7.11.23)(p34cdc2)	Bradi1g77330.1	2e-137	UDP-galactose transporter-related
AC243232.m00007	AC243232.t00006	-	295
AC243232.m00008	AC243232.t00007	-	301	LOC_Os02g29960.1	1e-102	cytochrome P450, putative, expressed	Sb02g025850.1	2e-96	TT7 (TRANSPARENT TESTA 7); flavonoid 3\'-monooxygenase/ oxygen binding	GRMZM2G125482_P01	3e-97	flavonoid 3-monooxygenase	Bradi4g31380.1	1e-97	TT7 (TRANSPARENT TESTA 7); flavonoid 3\'-monooxygenase/ oxygen binding
AC243232.m00009	AC243232.t00008	-	507	LOC_Os04g11810.1	2e-75	transferase family protein, putative, expressed	Sb09g005680.1	3e-74	transferase family protein	GRMZM2G073829_P01	7e-111	hypothetical protein LOC100382250	Bradi5g01770.1	4e-70	transferase family protein
AC243232.m00010	AC243232.t00009	+	493	LOC_Os02g29960.1	2e-171	cytochrome P450, putative, expressed	Sb02g025850.1	2e-166	TT7 (TRANSPARENT TESTA 7); flavonoid 3\'-monooxygenase/ oxygen binding	GRMZM2G140915_P01	9e-171	flavonoid 3-monooxygenase	Bradi4g31380.1	5e-167	TT7 (TRANSPARENT TESTA 7); flavonoid 3\'-monooxygenase/ oxygen binding
AC243232.m00011	AC243232.t00010	-	204	LOC_Os09g08990.1	9e-63	cytochrome P450, putative, expressed	Sb01g034710.1	8e-64	TT7 (TRANSPARENT TESTA 7); flavonoid 3\'-monooxygenase/ oxygen binding	GRMZM2G140915_P01	8e-67	flavonoid 3-monooxygenase	Bradi4g31380.1	6e-62	TT7 (TRANSPARENT TESTA 7); flavonoid 3\'-monooxygenase/ oxygen binding
AC243232.m00012	AC243232.t00011	-	301	LOC_Os02g29960.1	2e-101	cytochrome P450, putative, expressed	Sb02g025850.1	4e-96	TT7 (TRANSPARENT TESTA 7); flavonoid 3\'-monooxygenase/ oxygen binding	GRMZM2G125482_P01	8e-96	flavonoid 3-monooxygenase	Bradi4g31380.1	6e-96	TT7 (TRANSPARENT TESTA 7); flavonoid 3\'-monooxygenase/ oxygen binding
AC243232.m00013	AC243232.t00012	+	438	LOC_Os04g11810.1	4e-84	transferase family protein, putative, expressed	Sb09g005680.1	2e-84	transferase family protein	GRMZM2G073829_P01	5e-136	hypothetical protein LOC100382250	Bradi5g01770.1	2e-80	transferase family protein
AC243233.m00001	AC243233.t00001	+	279	LOC_Os08g13920.1	6e-99	glycosyl hydrolases family 16, putative, expressed	Sb06g015880.1	4e-132	TCH4 (Touch 4); hydrolase, acting on glycosyl bonds / xyloglucan:xyloglucosyl transferase	GRMZM2G119783_P01	4e-132	xyloglucan endo-transglycosylase/hydrolase	Bradi3g18590.1	4e-101	XTR3 (XYLOGLUCAN ENDOTRANSGLYCOSYLASE 3); hydrolase, acting on glycosyl bonds / xyloglucan:xyloglucosyl transferase
AC243233.m00002	AC243233.t00002	-	419	LOC_Os11g31020.1	9e-29	transposon protein, putative, Pong sub-class
AC243233.m00003	AC243233.t00003	+	203	LOC_Os10g41780.3	3e-36	chlorophyllide a oxygenase, chloroplast precursor, putative, expressed	Sb03g046660.1	2e-40	CH1 (CHLORINA 1); chlorophyllide a oxygenase	GRMZM2G038487_P04	4e-41	LOC100284976	Bradi2g61500.2	5e-31
AC243233.m00004	AC243233.t00004	-	235	LOC_Os02g19620.1	3e-16	retrotransposon protein, putative, unclassified
AC243233.m00005	AC243233.t00005	+	147	LOC_Os01g03710.1	1e-48	mannose-6-phosphate isomerase, putative, expressed	Sb03g007380.2	3e-53		GRMZM2G121066_P01	8e-53	hypothetical protein LOC100272600	Bradi2g01950.1	3e-44	MEE31 (MATERNAL EFFECT EMBRYO ARREST 31); mannose-6-phosphate isomerase
AC243233.m00006	AC243233.t00006	+	186	LOC_Os04g51520.1	6e-11	glycosyl hydrolases family 16, putative, expressed	Sb06g015930.1	4e-26	xyloglucan:xyloglucosyl transferase, putative / xyloglucan endotransglycosylase, putative / endo-xyloglucan transferase, putative	GRMZM2G063566_P02	8e-26	hypothetical protein LOC100217032	Bradi3g18590.1	9e-11	XTR3 (XYLOGLUCAN ENDOTRANSGLYCOSYLASE 3); hydrolase, acting on glycosyl bonds / xyloglucan:xyloglucosyl transferase
AC243233.m00007	AC243233.t00007	+	337	LOC_Os02g48870.1	1e-80	aspartic proteinase nepenthesin-2 precursor, putative, expressed	Sb04g029390.1	4e-106	chloroplast nucleoid DNA-binding protein, putative	GRMZM2G124684_P01	7e-99	aspartic proteinase nepenthesin-2	Bradi3g53620.1	4e-76	chloroplast nucleoid DNA-binding protein, putative
AC243233.m00008	AC243233.t00008	-	444	LOC_Os12g36270.1	1e-63	expressed protein	Sb08g018990.1	2e-63	binding	GRMZM2G399325_P01	2e-47		Bradi4g05280.1	3e-44	binding
AC243234.m00001	AC243234.t00001	-	513	LOC_Os01g40050.2	0	peptidyl-prolyl cis-trans isomerase, putative, expressed	Sb03g026040.1	0	peptidyl-prolyl cis-trans isomerase cyclophilin-type family protein	GRMZM2G036720_P01	0	peptidyl-prolyl isomerase CWC27	Bradi2g41910.3	0
AC243234.m00002	AC243234.t00002	+	833	LOC_Os01g40070.1	0	expressed protein	Sb03g026050.1	0	unknown protein	GRMZM2G037015_P01	0	hypothetical protein LOC100191551	Bradi2g41940.1	0	unknown protein
AC243234.m00003	AC243234.t00003	-	42	LOC_Os02g44500.1	2e-11	glutathione peroxidase, putative, expressed	Sb04g032520.1	5e-12	ATGPX6 (GLUTATHIONE PEROXIDASE 6); glutathione peroxidase	GRMZM2G135893_P01	1e-11	GP protein	Bradi3g51010.1	6e-12	ATGPX6 (GLUTATHIONE PEROXIDASE 6); glutathione peroxidase
AC243234.m00004	AC243234.t00004	+	103	LOC_Os01g40094.1	9e-42	protein phosphatase 2C, putative, expressed	Sb03g026070.1	2e-43	HAB2; catalytic/ protein serine/threonine phosphatase	GRMZM2G134628_P01	1e-40	protein phosphatase 2C ABI2	Bradi2g41950.1	1e-39	HAB2; catalytic/ protein serine/threonine phosphatase
AC243234.m00005	AC243234.t00005	-	82	LOC_Os06g09850.3	7e-19	25.3 kDa vesicle transport protein, putative, expressed	Sb01g005550.1	5e-18	SEC22; transporter	GRMZM2G120596_P01	2e-17		Bradi1g06110.1	9e-19	SEC22; transporter
AC243234.m00006	AC243234.t00006	+	162
AC243234.m00007	AC243234.t00007	+	358	LOC_Os01g40110.1	2e-86	ZOS1-11 - C2H2 zinc finger protein, expressed	Sb03g026080.1	3e-109	zinc ion binding	GRMZM2G170632_P02	7e-105	hypothetical protein LOC100194397	Bradi2g41960.1	7e-83	eukaryotic translation initiation factor 2 family protein / eIF-2 family protein
AC243234.m00008	AC243234.t00008	+	899	LOC_Os01g40190.1	4e-50	retrotransposon protein, putative, unclassified, expressed	Sb03g026090.1	5e-90	hydroxyproline-rich glycoprotein family protein	GRMZM2G170628_P01	5e-67		Bradi2g41970.1	4e-26	hydroxyproline-rich glycoprotein family protein
AC243235.m00001	AC243235.t00001	-	143	LOC_Os04g28050.2	7e-14	expressed protein
AC243235.m00002	AC243235.t00002	+	195										Bradi4g42180.1	3e-12	anac090 (Arabidopsis NAC domain containing protein 90); transcription factor
AC243235.m00003	AC243235.t00003	-	538	LOC_Os12g26020.1	1e-79	conserved hypothetical protein	Sb04g038210.1	2e-27	DNA binding / protein dimerization	GRMZM2G179358_P01	2e-98		Bradi2g07300.1	1e-14	DNA binding / protein dimerization
AC243235.m00004	AC243235.t00004	-	479	LOC_Os01g71800.1	3e-158	lecithin cholesterol acyltransferase, putative	Sb01g028270.1	8e-167	lecithin:cholesterol acyltransferase family protein / LACT family protein	GRMZM2G035256_P01	3e-110		Bradi2g19520.1	1e-105	lecithin:cholesterol acyltransferase family protein / LACT family protein
AC243236.m00001	AC243236.t00001	+	197	LOC_Os05g23140.1	6e-45	retrotransposon protein, putative, LINE subclass, expressed	Sb07g028370.1	2e-35	HSP21 (HEAT SHOCK PROTEIN 21)	GRMZM2G080724_P01	5e-36	retrotransposon protein	Bradi1g68440.1	2e-12	HSP21 (HEAT SHOCK PROTEIN 21)
AC243236.m00002	AC243236.t00002	-	469	LOC_Os08g26820.1	1e-112	plant protein of unknown function domain containing protein, expressed	Sb07g019160.1	2e-124	unknown protein	GRMZM2G174449_P01	5e-116	hypothetical protein LOC100273307	Bradi3g22070.1	1e-96	unknown protein
AC243236.m00003	AC243236.t00003	-	759	LOC_Os08g26820.1	6e-107	plant protein of unknown function domain containing protein, expressed	Sb07g019160.1	1e-105	unknown protein	GRMZM2G174449_P01	8e-101	hypothetical protein LOC100273307	Bradi3g22070.1	7e-88	unknown protein
AC243236.m00004	AC243236.t00004	+	265				Sb08g023260.1	8e-15	protein kinase family protein	GRMZM2G151236_P06	3e-14	Putative uncharacterized protein
AC243236.m00005	AC243236.t00005	+	257				Sb07g015690.1	7e-20	ATBPM4 (BTB-POZ and MATH domain 4); protein binding
AC243236.m00006	AC243236.t00006	-	622	LOC_Os04g36910.1	2e-59	expressed protein	Sb07g025780.1	7e-73	F-box family protein	GRMZM2G026737_P01	4e-55	hypothetical protein LOC100216712	Bradi3g54590.1	2e-50	F-box family protein
AC243236.m00007	AC243236.t00007	+	200	LOC_Os08g25700.1	5e-32	expressed protein	Sb07g012110.1	4e-41	unknown protein	GRMZM2G091245_P01	4e-43	hypothetical protein LOC100277966 (LOC100277966), mRNA	Bradi3g22350.2	1e-32
AC243236.m00008	AC243236.t00008	+	365				Sb08g021650.1	5e-16	ORC3 (ORIGIN RECOGNITION COMPLEX SUBUNIT 3); protein binding	GRMZM2G381822_P01	1e-14	origin recognition complex subunit 3
AC243236.m00009	AC243236.t00009	-	484	LOC_Os02g09270.1	6e-113	cytochrome P450 71A1, putative, expressed	Sb04g005760.1	2e-127	CYP71B13; electron carrier/ heme binding / iron ion binding / monooxygenase/ oxygen binding	GRMZM2G012865_P01	4e-129	hypothetical protein LOC100382160	Bradi3g06240.1	2e-117	CYP71B23; electron carrier/ heme binding / iron ion binding / monooxygenase/ oxygen binding
AC243237.m00001	AC243237.t00001	-	566	LOC_Os09g25090.1	0	CAMK_KIN1/SNF1/Nim1_like.34 - CAMK includes calcium/calmodulin depedent protein kinases, expressed	Sb02g024770.1	0	CIPK5 (CBL-INTERACTING PROTEIN KINASE 5); ATP binding / kinase/ protein kinase/ protein serine/threonine kinase	GRMZM2G129018_P02	0	CIPK-like protein 1	Bradi4g30380.1	0	CIPK5 (CBL-INTERACTING PROTEIN KINASE 5); ATP binding / kinase/ protein kinase/ protein serine/threonine kinase
AC243237.m00002	AC243237.t00002	-	332	LOC_Os01g72420.1	2e-22	C2 domain containing protein, putative, expressed	Sb03g046100.1	2e-14	C2 domain-containing protein	GRMZM2G071292_P01	6e-13		Bradi2g61060.1	2e-13	C2 domain-containing protein
AC243237.m00003	AC243237.t00003	-	226
AC243237.m00004	AC243237.t00004	+	314	LOC_Os04g10610.1	4e-20	transposon protein, putative, unclassified
AC243237.m00005	AC243237.t00005	-	499	LOC_Os09g27500.1	5e-177	cytochrome P450, putative, expressed	Sb02g026160.1	0	CYP76C2; electron carrier/ heme binding / iron ion binding / monooxygenase/ oxygen binding	GRMZM2G154752_P01	7e-175	hypothetical protein LOC100273519	Bradi4g31710.1	1e-177	CYP76C2; electron carrier/ heme binding / iron ion binding / monooxygenase/ oxygen binding
AC243237.m00006	AC243237.t00006	+	348	LOC_Os09g25190.1	9e-127	protein binding protein, putative, expressed	Sb02g024800.1	2e-165	zinc finger (C3HC4-type RING finger) family protein	GRMZM2G125867_P02	1e-160	ubiquitin-protein ligase/ zinc ion binding protein	Bradi4g30410.1	2e-112	zinc finger (C3HC4-type RING finger) family protein
AC243237.m00007	AC243237.t00007	+	149	LOC_Os02g14090.1	5e-20	berberine and berberine like domain containing protein, expressed	Sb04g008542.1	5e-23	FAD-binding domain-containing protein	GRMZM2G429540_P01	3e-21	Putative uncharacterized protein	Bradi3g35070.1	8e-23	FAD-binding domain-containing protein
AC243238.m00001	AC243238.t00001	-	398	LOC_Os07g40250.1	2e-64	sex determination protein tasselseed-2, putative, expressed	Sb02g038140.1	8e-79	binding / catalytic/ oxidoreductase	GRMZM2G076981_P02	2e-78		Bradi1g22860.1	1e-46	binding / catalytic/ oxidoreductase
AC243238.m00002	AC243238.t00002	-	121	LOC_Os07g40240.1	1e-15	GASR9 - Gibberellin-regulated GASA/GAST/Snakin family protein precursor, expressed	Sb02g038110.1	1e-21	gibberellin-regulated family protein	GRMZM2G077845_P01	1e-20	LOC100284162
AC243238.m00003	AC243238.t00003	+	339	LOC_Os07g40150.1	2e-121	expressed protein	Sb02g038090.1	3e-128	unknown protein	GRMZM2G181219_P01	3e-128	hypothetical protein LOC100277866	Bradi1g22870.1	2e-112	unknown protein
AC243238.m00004	AC243238.t00004	-	827	LOC_Os07g40120.1	0	pentatricopeptide, putative, expressed	Sb02g038080.1	0	pentatricopeptide (PPR) repeat-containing protein	GRMZM2G092739_P01	0		Bradi1g22890.1	0	pentatricopeptide (PPR) repeat-containing protein
AC243238.m00005	AC243238.t00005	+	109	LOC_Os02g09720.1	2e-23	multidrug resistance protein, putative, expressed	Sb04g006090.1	4e-26	ABC transporter family protein	GRMZM5G843192_P01	3e-18
AC243238.m00006	AC243238.t00006	+	920	LOC_Os02g09720.1	0	multidrug resistance protein, putative, expressed	Sb04g006100.1	0	ABC transporter family protein	GRMZM2G146034_P01	0		Bradi3g06580.1	0	ABC transporter family protein
AC243238.m00007	AC243238.t00007	-	681	LOC_Os03g32220.1	2e-23	ZOS3-11 - C2H2 zinc finger protein, expressed	Sb02g038070.1	6e-33	ZAT6 (ZINC FINGER OF ARABIDOPSIS THALIANA 6); nucleic acid binding / transcription factor/ zinc ion binding	AC185108.3_FGP011	6e-36		Bradi2g49250.1	1e-21	ZAT6 (ZINC FINGER OF ARABIDOPSIS THALIANA 6); nucleic acid binding / transcription factor/ zinc ion binding
AC243238.m00008	AC243238.t00008	-	563	LOC_Os02g03890.1	5e-96	nuclear transport factor 2, putative, expressed	Sb02g038050.2	8e-98		GRMZM2G167932_P02	3e-96	RNA binding protein	Bradi3g12770.3	2e-91
AC243238.m00009	AC243238.t00009	-	838	LOC_Os07g40020.1	2e-179	GRAS family transcription factor domain containing protein, expressed	Sb02g038040.1	0	scarecrow transcription factor family protein	GRMZM2G097456_P01	0	GRAS family transcription factor containing protein	Bradi1g22910.1	2e-148	scarecrow transcription factor family protein
AC243238.m00010	AC243238.t00010	-	276	LOC_Os01g64910.1	1e-18	anthocyanidin 5,3-O-glucosyltransferase, putative, expressed	Sb02g036210.1	7e-31	UDP-glucoronosyl/UDP-glucosyl transferase family protein	GRMZM2G096412_P01	4e-33	hypothetical protein LOC100193798	Bradi2g19150.1	4e-13	UDP-glucoronosyl/UDP-glucosyl transferase family protein
AC243238.m00011	AC243238.t00011	-	217	LOC_Os07g40000.1	1e-71	DUF260 domain containing protein, putative, expressed	Sb02g038030.1	5e-69	LBD37 (LOB DOMAIN-CONTAINING PROTEIN 37)	GRMZM2G177110_P01	4e-65	seed specific protein Bn15D17A	Bradi1g22920.1	4e-63	LBD37 (LOB DOMAIN-CONTAINING PROTEIN 37)
AC243238.m00012	AC243238.t00012	-	253	LOC_Os07g39980.1	7e-126	GA22009-PA, putative, expressed	Sb02g038020.1	1e-128		GRMZM5G824534_P02	2e-128	hypothetical protein LOC100276448	Bradi1g22930.1	3e-121
AC243238.m00013	AC243238.t00013	-	673	LOC_Os03g36000.1	4e-31	retrotransposon protein, putative, unclassified	Sb01g040330.1	3e-58	nucleic acid binding / zinc ion binding	GRMZM2G360439_P01	4e-14		Bradi4g23630.1	3e-58	nucleic acid binding / zinc ion binding
AC243238.m00014	AC243238.t00014	-	573	LOC_Os07g39960.1	1e-27	ZOS7-07 - C2H2 zinc finger protein	Sb02g038000.1	2e-32	zinc finger (C2H2 type) family protein	GRMZM2G089557_P01	3e-24	zinc finger, C2H2 type family protein	Bradi1g22940.1	2e-26	zinc finger (C2H2 type) family protein
AC243239.m00001	AC243239.t00001	-	62
AC243239.m00002	AC243239.t00002	-	91
AC243239.m00003	AC243239.t00003	+	339	LOC_Os05g23670.1	3e-88	transcription factor jumonji, putative, expressed	Sb09g008870.1	3e-84	transcription factor	GRMZM2G108589_P02	7e-86	hypothetical protein LOC100194382	Bradi2g31110.2	5e-80
AC243239.m00004	AC243239.t00004	+	211	LOC_Os05g23670.1	6e-58	transcription factor jumonji, putative, expressed	Sb02g000900.1	6e-58	transcription factor	GRMZM2G044301_P01	2e-62		Bradi2g31110.1	8e-58	transcription factor
AC243240.m00001	AC243240.t00001	+	154
AC243240.m00002	AC243240.t00002	+	88	LOC_Os09g07510.2	2e-20	HEAT repeat family protein, putative, expressed	Sb10g001960.2	2e-21		GRMZM2G164352_P05	4e-21	LOC732740	Bradi4g08720.1	1e-20	PP2AA2 (PROTEIN PHOSPHATASE 2A SUBUNIT A2); protein phosphatase type 2A regulator
AC243240.m00003	AC243240.t00003	-	269	LOC_Os06g19800.1	4e-70	BURP domain containing protein, expressed	Sb09g025520.1	1e-39	RD22; nutrient reservoir	GRMZM2G106980_P02	8e-93	hypothetical protein LOC100279974	Bradi1g42970.1	1e-75	RD22; nutrient reservoir
AC243240.m00004	AC243240.t00004	-	297	LOC_Os06g19730.1	1e-101	HEAT repeat family protein, putative, expressed	Sb10g011095.1	8e-64	binding	GRMZM2G107116_P02	1e-58	hypothetical protein LOC100383447 (LOC100383447), mRNA	Bradi1g42980.1	6e-98	binding
AC243240.m00005	AC243240.t00005	-	560	LOC_Os06g19730.1	7e-144	HEAT repeat family protein, putative, expressed				GRMZM2G107116_P02	6e-147	hypothetical protein LOC100383447 (LOC100383447), mRNA	Bradi1g42980.1	5e-139	binding
AC243240.m00006	AC243240.t00006	-	1300	LOC_Os06g19730.1	0	HEAT repeat family protein, putative, expressed				GRMZM2G107116_P02	0	hypothetical protein LOC100383447 (LOC100383447), mRNA	Bradi1g42980.1	0	binding
AC243240.m00007	AC243240.t00007	-	270	LOC_Os06g19730.1	7e-11	HEAT repeat family protein, putative, expressed				GRMZM2G107116_P03	5e-11	hypothetical protein LOC100383447 (LOC100383447), mRNA	Bradi1g42980.1	4e-11	binding
AC243240.m00008	AC243240.t00008	-	327				Sb10g011090.1	4e-11	binding				Bradi1g42980.1	6e-11	binding
AC243240.m00009	AC243240.t00009	-	58
AC243240.m00010	AC243240.t00010	-	128	LOC_Os09g38200.1	6e-12	retrotransposon protein, putative, unclassified				GRMZM2G336137_P01	9e-12
AC243240.m00011	AC243240.t00011	+	76	LOC_Os06g19690.1	4e-16	expressed protein	Sb02g004205.1	1e-15	unknown protein	GRMZM2G046529_P02	1e-15		Bradi1g42990.1	3e-17	unknown protein
AC243240.m00012	AC243240.t00012	+	413	LOC_Os03g63570.1	2e-11	hypothetical protein	Sb05g022610.1	2e-16	nucleic acid binding
AC243240.m00013	AC243240.t00013	+	518	LOC_Os06g47880.1	4e-52	cell division control protein 2 homolog 3, putative	Sb02g033740.1	5e-105	protein kinase family protein	GRMZM2G139213_P01	2e-50		Bradi4g31620.1	1e-63	protein kinase family protein
AC243240.m00014	AC243240.t00014	-	227	LOC_Os11g41390.1	4e-17	hypothetical protein
AC243240.m00015	AC243240.t00015	+	385	LOC_Os06g19680.1	3e-83	zinc finger, C3HC4 type domain containing protein, expressed	Sb10g011070.1	1e-84	zinc finger (C3HC4-type RING finger) family protein	GRMZM2G055643_P03	8e-82	hypothetical protein LOC100384282	Bradi1g43000.2	1e-82
AC243240.m00016	AC243240.t00016	-	134	LOC_Os06g17000.1	2e-28	BURP domain containing protein, expressed	Sb09g025520.1	1e-21	RD22; nutrient reservoir	GRMZM5G800586_P01	3e-12	hypothetical protein LOC100273184	Bradi1g49320.1	4e-23	RD22; nutrient reservoir
AC243240.m00017	AC243240.t00017	-	223	LOC_Os06g17000.1	3e-40	BURP domain containing protein, expressed	Sb09g025520.1	6e-40	RD22; nutrient reservoir	GRMZM5G800586_P01	5e-23	hypothetical protein LOC100273184	Bradi1g50720.1	6e-35	RD22; nutrient reservoir
AC243241.m00001	AC243241.t00001	+	225
AC243241.m00002	AC243241.t00002	-	296	LOC_Os04g38240.1	1e-10	transposon protein, putative, unclassified
AC243241.m00003	AC243241.t00003	-	316	LOC_Os10g37170.1	4e-29	retrotransposon protein, putative, unclassified	Sb06g016240.1	1e-88	nucleic acid binding	GRMZM2G092104_P01	2e-20		Bradi2g31530.1	4e-42	nucleic acid binding
AC243241.m00004	AC243241.t00004	-	284	LOC_Os12g09530.1	1e-40	retrotransposon protein, putative, unclassified	Sb01g046340.1	2e-26	reverse transcriptase, putative / RNA-dependent DNA polymerase, putative	GRMZM2G360439_P01	2e-29		Bradi3g36100.1	3e-49	unknown protein
AC243241.m00005	AC243241.t00005	+	63	LOC_Os10g42090.2	1e-24	AGAP003819-PA, putative, expressed	Sb01g028480.1	3e-25	unknown protein	GRMZM2G144818_P01	2e-25		Bradi3g33920.1	2e-21	unknown protein
AC243241.m00006	AC243241.t00006	+	722	LOC_Os10g42100.1	0	pyruvate kinase, putative, expressed	Sb01g028470.1	0	PKP-BETA1 (PLASTIDIC PYRUVATE KINASE BETA SUBUNIT 1); pyruvate kinase	GRMZM2G033526_P01	0	hypothetical protein LOC100273990	Bradi3g33930.1	0	PKP-BETA1 (PLASTIDIC PYRUVATE KINASE BETA SUBUNIT 1); pyruvate kinase
AC243241.m00007	AC243241.t00007	+	207	LOC_Os10g42110.1	1e-91	protein kinase family protein, putative, expressed	Sb01g028460.1	1e-93	BSK2 (BR-SIGNALING KINASE 2); ATP binding / binding / kinase/ protein kinase/ protein tyrosine kinase	GRMZM2G054634_P01	1e-93	ATP binding protein	Bradi3g33950.1	4e-90	BSK2 (BR-SIGNALING KINASE 2); ATP binding / binding / kinase/ protein kinase/ protein tyrosine kinase
AC243241.m00008	AC243241.t00007	+	507	LOC_Os10g42110.1	0	protein kinase family protein, putative, expressed	Sb01g028460.1	0	BSK2 (BR-SIGNALING KINASE 2); ATP binding / binding / kinase/ protein kinase/ protein tyrosine kinase	GRMZM2G169080_P01	0		Bradi3g33950.1	0	BSK2 (BR-SIGNALING KINASE 2); ATP binding / binding / kinase/ protein kinase/ protein tyrosine kinase
AC243242.m00001	AC243242.t00001	+	311
AC243242.m00002	AC243242.t00002	-	322	LOC_Os02g30650.1	6e-64	heavy metal-associated domain containing protein, expressed	Sb04g020690.1	2e-71	ATFP3; metal ion binding / transition metal ion binding	GRMZM2G111872_P01	1e-70	hypothetical protein LOC100304361	Bradi3g44140.1	8e-65	ATFP3; metal ion binding / transition metal ion binding
AC243242.m00003	AC243242.t00003	-	108
AC243242.m00004	AC243242.t00004	-	672	LOC_Os02g30630.2	0	thiamine pyrophosphate enzyme, C-terminal TPP binding domain containing protein, expressed	Sb04g020680.1	0	CSR1 (CHLORSULFURON/IMIDAZOLINONE RESISTANT 1); acetolactate synthase/ pyruvate decarboxylase	GRMZM2G143008_P01	0	Acetolactate synthase 1, chloroplastic Precursor (EC 2.2.1.6)(Acetohydroxy-acid synthase 1)	Bradi3g44130.1	0	CSR1 (CHLORSULFURON/IMIDAZOLINONE RESISTANT 1); acetolactate synthase/ pyruvate decarboxylase
AC243242.m00005	AC243242.t00005	+	90				Sb06g013920.1	2e-11	small nuclear ribonucleoprotein F, putative / U6 snRNA-associated Sm-like protein, putative / Sm protein F, putative	GRMZM2G159675_P01	4e-11	hypothetical protein LOC100192719
AC243242.m00006	AC243242.t00006	-	850	LOC_Os02g30620.3	0	dnaJ domain containing protein, expressed	Sb04g020670.1	0	heat shock protein binding / unfolded protein binding	GRMZM2G147123_P01	0		Bradi5g08200.1	0	heat shock protein binding / unfolded protein binding
AC243242.m00007	AC243242.t00007	-	209	LOC_Os02g30610.2	3e-38	expressed protein	Sb04g020660.1	7e-54	unknown protein	GRMZM2G119270_P01	1e-58		Bradi3g44100.1	3e-40	unknown protein
AC243242.m00008	AC243242.t00007	-	209	LOC_Os02g30610.2	3e-38	expressed protein	Sb04g020660.1	7e-54	unknown protein	GRMZM2G119270_P01	1e-58		Bradi3g44100.1	3e-40	unknown protein
AC243242.m00009	AC243242.t00008	+	164	LOC_Os05g10420.1	3e-38	hypothetical protein	Sb05g024000.1	4e-18					Bradi5g22690.1	3e-13
AC243242.m00010	AC243242.t00009	-	93	LOC_Os06g50110.1	5e-16	expressed protein	Sb08g001600.1	2e-19	unknown protein	GRMZM2G099005_P01	6e-17	hypothetical protein LOC100192031
AC243242.m00011	AC243242.t00010	-	130	LOC_Os05g10420.1	3e-40	hypothetical protein	Sb05g024010.1	3e-18					Bradi5g22690.1	6e-15
AC243242.m00012	AC243242.t00011	+	564	LOC_Os02g30470.1	9e-34	expressed protein	Sb04g020640.1	5e-35	unknown protein	GRMZM2G124026_P01	2e-34	Putative uncharacterized protein	Bradi3g44070.1	2e-32	unknown protein
AC243242.m00013	AC243242.t00012	+	149	LOC_Os02g30460.1	7e-43	uncharacterized protein MJ0304, putative, expressed	Sb04g020630.1	1e-44	GAMMA CAL2 (GAMMA CARBONIC ANHYDRASE-LIKE 2); transferase	GRMZM2G125668_P01	2e-44	mitochondrial NADH ubiquinone oxidoreductase 29 kDa subunit	Bradi3g44060.1	3e-43	GAMMA CAL2 (GAMMA CARBONIC ANHYDRASE-LIKE 2); transferase
AC243243.m00001	AC243243.t00001	-	828	LOC_Os04g38290.1	5e-50	expressed protein	Sb01g028180.1	3e-69		GRMZM2G104198_P01	4e-34	hypothetical protein LOC100277508	Bradi4g21310.1	2e-38
AC243243.m00002	AC243243.t00002	+	76
AC243243.m00003	AC243243.t00003	+	245
AC243243.m00004	AC243243.t00004	-	376	LOC_Os11g06780.1	7e-107	serine/threonine-protein kinase BRI1-like 1 precursor, putative, expressed	Sb02g000750.1	2e-58	leucine-rich repeat transmembrane protein kinase, putative	GRMZM2G120574_P01	9e-58		Bradi4g24590.1	1e-104	protein kinase family protein
AC243243.m00005	AC243243.t00005	+	574	LOC_Os05g34820.1	7e-152	expressed protein	Sb04g024620.1	2e-157	binding	GRMZM2G020409_P01	9e-156		Bradi5g18230.1	3e-150	binding
AC243244.m00001	AC243244.t00001	-	820	LOC_Os11g11490.1	0	TKL_IRAK_CR4L.7 - The CR4L subfamily has homology with Crinkly4, expressed	Sb05g008500.1	0	CCR4 (ARABIDOPSIS THALIANA CRINKLY4 RELATED 4); kinase	GRMZM2G118628_P01	0		Bradi4g22030.1	0	CCR4 (ARABIDOPSIS THALIANA CRINKLY4 RELATED 4); kinase
AC243244.m00002	AC243244.t00002	-	116	LOC_Os11g11430.2	8e-16	OsIAA29 - Auxin-responsive Aux/IAA gene family member, expressed	Sb05g008510.1	2e-23	IAA9 (INDOLE-3-ACETIC ACID INDUCIBLE 9); transcription factor	GRMZM2G148188_P01	8e-23		Bradi4g22050.1	7e-15	IAA18 (INDOLE-3-ACETIC ACID INDUCIBLE 18); transcription factor
AC243244.m00003	AC243244.t00003	-	344	LOC_Os11g11410.1	4e-66	OsIAA27 - Auxin-responsive Aux/IAA gene family member, expressed	Sb05g008512.1	8e-96	IAA13; transcription factor	GRMZM5G825707_P02	2e-76	IAA27 - auxin-responsive Aux/IAA family member	Bradi4g22060.1	1e-64	IAA18 (INDOLE-3-ACETIC ACID INDUCIBLE 18); transcription factor
AC243244.m00004	AC243244.t00003	-	343	LOC_Os11g11410.1	8e-65	OsIAA27 - Auxin-responsive Aux/IAA gene family member, expressed	Sb05g008512.1	2e-94	IAA13; transcription factor	GRMZM5G825707_P02	7e-76	IAA27 - auxin-responsive Aux/IAA family member	Bradi4g22060.1	7e-66	IAA18 (INDOLE-3-ACETIC ACID INDUCIBLE 18); transcription factor
AC243245.m00001	AC243245.t00001	-	632	LOC_Os05g08310.1	1e-58	retrotransposon protein, putative, Ty3-gypsy subclass				GRMZM2G393157_P01	6e-139
AC243245.m00002	AC243245.t00002	+	322	LOC_Os05g40110.1	3e-38	retrotransposon protein, putative, unclassified	Sb04g012900.1	4e-84		AC190767.2_FGP001	2e-38		Bradi5g04800.1	1e-17
AC243245.m00003	AC243245.t00003	+	153				Sb03g022830.1	3e-11	unknown protein
AC243245.m00004	AC243245.t00004	+	78							GRMZM2G018024_P01	2e-11
AC243245.m00005	AC243245.t00005	+	167				Sb10g005340.1	5e-11	nodulin family protein	GRMZM2G127080_P02	7e-11	hypothetical protein LOC100382294
AC243246.m00001	AC243246.t00001	-	310	LOC_Os11g06610.1	3e-43	jasmonate-induced protein, putative				GRMZM2G092160_P03	6e-87	hypothetical protein LOC100382852 (LOC100382852), mRNA
AC243246.m00002	AC243246.t00002	+	326	LOC_Os11g06460.1	2e-19	ribosome inactivating protein, expressed	Sb02g038250.1	2e-18		GRMZM2G100776_P01	8e-51		Bradi1g63700.1	3e-14
AC243246.m00003	AC243246.t00003	-	77
AC243246.m00004	AC243246.t00004	-	306	LOC_Os11g06610.1	8e-43	jasmonate-induced protein, putative				GRMZM2G092160_P03	8e-86	hypothetical protein LOC100382852 (LOC100382852), mRNA
AC243246.m00005	AC243246.t00005	+	70
AC243246.m00006	AC243246.t00006	+	54
AC243246.m00007	AC243246.t00007	+	219
AC243246.m00008	AC243246.t00008	-	413	LOC_Os08g30740.1	1e-70	ABC transporter, ATP-binding protein, putative, expressed	Sb07g019510.1	4e-80	ATATH1; ATPase, coupled to transmembrane movement of substances / transporter	GRMZM2G142249_P01	5e-80		Bradi3g35400.2	4e-72
AC243247.m00001	AC243247.t00001	+	140	LOC_Os07g12650.3	2e-68	ribosomal protein L7Ae, putative, expressed	Sb09g020940.1	8e-76	40S ribosomal protein S12 (RPS12C)	GRMZM2G139900_P02	8e-75	hypothetical protein LOC100193804	Bradi1g53740.2	2e-67
AC243247.m00002	AC243247.t00002	+	109	LOC_Os07g12650.1	1e-45	ribosomal protein L7Ae, putative, expressed	Sb09g020940.1	2e-50	40S ribosomal protein S12 (RPS12C)	GRMZM2G132929_P01	3e-50	LOC100281932	Bradi1g06520.3	1e-43
AC243247.m00003	AC243247.t00003	+	44
AC243247.m00004	AC243247.t00004	+	179	LOC_Os03g13180.1	5e-15	peroxidase precursor, putative, expressed	Sb09g021000.1	5e-25	peroxidase, putative	GRMZM2G117365_P01	4e-25		Bradi1g68930.1	1e-28	peroxidase, putative
AC243247.m00005	AC243247.t00005	+	313	LOC_Os03g13180.1	1e-91	peroxidase precursor, putative, expressed	Sb09g021040.1	2e-137	peroxidase, putative	GRMZM2G117365_P01	1e-133		Bradi4g05230.1	1e-125	peroxidase, putative
AC243247.m00006	AC243247.t00006	+	185	LOC_Os10g01750.1	1e-39	retrotransposon protein, putative, unclassified	Sb09g020970.1	7e-46	peroxidase, putative	GRMZM2G117365_P01	3e-44		Bradi4g05230.1	4e-42	peroxidase, putative
AC243247.m00007	AC243247.t00007	-	451	LOC_Os11g14220.1	0	tubulin/FtsZ domain containing protein, putative, expressed	Sb01g009560.1	0	TUA2; structural constituent of cytoskeleton	GRMZM2G153292_P08	0	Tubulin alpha-1 chain (Alpha-1-tubulin)	Bradi1g10150.1	0	TUA2; structural constituent of cytoskeleton
AC243247.m00008	AC243247.t00008	+	292	LOC_Os05g35240.1	1e-17	expressed protein	Sb09g021060.1	6e-22		GRMZM2G071362_P01	2e-20		Bradi2g24720.1	3e-17
AC243247.m00009	AC243247.t00009	-	402	LOC_Os05g35266.1	6e-180	galactosyltransferase, putative, expressed	Sb09g021080.1	1e-172	galactosyltransferase family protein	GRMZM2G119265_P01	2e-153	beta-1,3-galactosyltransferase sqv-2	Bradi2g24700.1	2e-178	galactosyltransferase family protein
AC243247.m00010	AC243247.t00010	-	262	LOC_Os05g35274.5	2e-43	RNA recognition motif containing protein, putative, expressed	Sb09g021090.1	3e-43	RNA recognition motif (RRM)-containing protein	GRMZM2G175676_P04	2e-56	hypothetical protein LOC100384862	Bradi2g24690.4	3e-39
AC243247.m00011	AC243247.t00010	-	262	LOC_Os05g35274.5	2e-43	RNA recognition motif containing protein, putative, expressed	Sb09g021090.1	3e-43	RNA recognition motif (RRM)-containing protein	GRMZM2G175676_P04	2e-56	hypothetical protein LOC100384862	Bradi2g24690.4	3e-39
AC243247.m00012	AC243247.t00011	+	448	LOC_Os06g13120.1	5e-91	conserved hypothetical protein	Sb09g021100.1	9e-148	ankyrin repeat family protein	GRMZM2G056608_P01	5e-50		Bradi1g25900.1	7e-50	ankyrin repeat family protein
AC243247.m00013	AC243247.t00012	-	364	LOC_Os01g65480.1	4e-104	dnaJ domain containing protein, expressed	Sb09g021110.1	1e-134	DNAJ chaperone C-terminal domain-containing protein	GRMZM2G175860_P02	1e-127	hypothetical protein LOC100273460	Bradi2g24680.1	4e-111	DNAJ heat shock protein, putative
AC243247.m00014	AC243247.t00013	+	254	LOC_Os02g35200.1	4e-30	VP15, putative, expressed	Sb04g022920.1	2e-33	CNX7; catalytic	GRMZM2G121468_P02	7e-34	Molybdopterin synthase sulfur carrier subunit (Sulfur carrier protein MOCS2A)(Molybdenum cofactor synthesis protein 2A)(MOCS2A)(Molybdenum cofactor synthesis protein 2 small subunit)(Protein viviparous15)	Bradi3g45980.1	8e-33	CNX7; catalytic
AC243247.m00015	AC243247.t00014	-	538	LOC_Os05g35360.1	5e-126	beta-galactosidase 7 precursor, putative, expressed	Sb09g021140.1	2e-127	BGAL16 (beta-galactosidase 16); beta-galactosidase/ catalytic/ cation binding / sugar binding	AC234152.1_FGP005	3e-124		Bradi2g56600.1	5e-134	BGAL16 (beta-galactosidase 16); beta-galactosidase/ catalytic/ cation binding / sugar binding
AC243248.m00001	AC243248.t00001	+	338	LOC_Os06g47300.1	2e-17	RNA recognition motif containing protein, putative, expressed	Sb10g027920.1	2e-23	nucleic acid binding / nucleotide binding	GRMZM2G064330_P02	7e-23	hypothetical protein LOC100193418	Bradi1g33290.1	8e-18	nucleic acid binding / nucleotide binding
AC243248.m00002	AC243248.t00002	-	452	LOC_Os07g48500.1	2e-91	stress responsive protein, putative, expressed	Sb02g043260.2	2e-97		GRMZM2G410766_P01	2e-95	Stress responsive protein	Bradi1g17450.1	2e-88	hydroxyproline-rich glycoprotein family protein
AC243248.m00003	AC243248.t00003	-	436							AC198324.3_FGP003	6e-11
AC243248.m00004	AC243248.t00004	-	342	LOC_Os07g48490.2	5e-169	stress responsive protein, putative, expressed	Sb02g043230.1	1e-173	hydroxyproline-rich glycoprotein family protein	GRMZM2G469380_P02	1e-175	hypothetical protein LOC100275372	Bradi1g17460.1	1e-165	hydroxyproline-rich glycoprotein family protein
AC243248.m00005	AC243248.t00005	+	288	LOC_Os06g47310.1	9e-82	plant-specific domain TIGR01627 family protein, expressed	Sb10g027930.1	2e-91	unknown protein	GRMZM2G026881_P01	5e-91	Putative uncharacterized protein	Bradi1g33300.1	5e-66	unknown protein
AC243248.m00006	AC243248.t00006	+	248
AC243248.m00007	AC243248.t00007	-	277	LOC_Os06g47320.1	7e-58	T-complex protein, putative, expressed	Sb04g004030.1	6e-58	chaperonin, putative	GRMZM2G009871_P02	3e-57	hypothetical protein LOC100272855	Bradi3g04430.1	2e-57	chaperonin, putative
AC243248.m00008	AC243248.t00008	+	101	LOC_Os06g47330.1	7e-30	dynamin family protein, putative, expressed	Sb10g027960.1	2e-34	ATEHD1 (EPS15 HOMOLOGY DOMAIN 1); GTP binding / GTPase/ calcium ion binding	GRMZM2G113613_P01	7e-33	hypothetical protein LOC100384394	Bradi1g33310.1	8e-30	ATEHD1 (EPS15 HOMOLOGY DOMAIN 1); GTP binding / GTPase/ calcium ion binding
AC243248.m00009	AC243248.t00009	+	195	LOC_Os06g47330.1	6e-97	dynamin family protein, putative, expressed	Sb10g027960.1	5e-101	ATEHD1 (EPS15 HOMOLOGY DOMAIN 1); GTP binding / GTPase/ calcium ion binding	GRMZM2G113613_P01	1e-100	hypothetical protein LOC100384394	Bradi1g33310.1	4e-97	ATEHD1 (EPS15 HOMOLOGY DOMAIN 1); GTP binding / GTPase/ calcium ion binding
AC243248.m00010	AC243248.t00010	+	530	LOC_Os06g47340.1	0	glycosyltransferase family 43 protein, putative, expressed	Sb10g027970.1	0	glycosyl transferase family 43 protein	GRMZM2G113655_P01	0	glycosyltransferase	Bradi1g33320.3	0
AC243248.m00011	AC243248.t00011	-	305	LOC_Os08g40050.1	1e-19	retrotransposon protein, putative, unclassified, expressed	Sb09g027900.1	1e-10	nucleic acid binding	GRMZM2G010548_P01	1e-14
AC243248.m00012	AC243248.t00012	+	282	LOC_Os04g57440.1	2e-39	oryzain beta chain precursor, putative, expressed	Sb10g027980.1	1e-47	cysteine proteinase, putative / thiol protease, putative	GRMZM2G166603_P01	1e-42		Bradi5g25640.1	2e-39	cysteine proteinase, putative / thiol protease, putative
AC243248.m00013	AC243248.t00013	+	253	LOC_Os04g55650.1	3e-24	oryzain alpha chain precursor, putative, expressed	Sb10g028000.1	2e-32	cysteine proteinase, putative / thiol protease, putative	GRMZM2G150276_P01	1e-29	maize insect resistance1	Bradi5g24030.3	4e-25
AC243249.m00001	AC243249.t00001	+	203	LOC_Os03g25030.1	1e-22	GDSL-like lipase/acylhydrolase, putative, expressed	Sb02g040890.1	2e-14	lipase, putative	GRMZM2G117754_P02	2e-18	alpha-L-fucosidase 2	Bradi1g19840.1	5e-16	lipase, putative
AC243249.m00002	AC243249.t00002	-	97	LOC_Os03g25050.1	1e-45	chaperonin, putative, expressed	Sb01g034530.1	4e-48	CPN10 (CHAPERONIN 10); chaperone binding	GRMZM2G073401_P01	6e-48	LOC100286239	Bradi1g19860.1	2e-39	CPN10 (CHAPERONIN 10); chaperone binding
AC243249.m00003	AC243249.t00003	-	140	LOC_Os04g40380.1	1e-17	hypothetical protein	Sb07g001530.1	1e-15		GRMZM2G037023_P01	5e-11	hypothetical protein LOC100278687
AC243249.m00004	AC243249.t00004	+	220	LOC_Os07g44710.1	4e-26	CAMK_CAMK_like.36 - CAMK includes calcium/calmodulin depedent protein kinases, expressed	Sb01g034520.1	6e-27	calcium-dependent protein kinase, putative / CDPK, putative	GRMZM2G422576_P03	2e-26	hypothetical protein LOC100381527	Bradi1g35090.1	4e-21	calcium-dependent protein kinase, putative / CDPK, putative
AC243249.m00005	AC243249.t00005	-	330	LOC_Os06g42890.1	3e-74	DNA binding protein, putative	Sb05g001130.1	2e-57	ATGSTT3 (GLUTATHIONE S-TRANSFERASE THETA 3); glutathione transferase	GRMZM2G026879_P01	5e-92		Bradi1g42330.1	2e-16	DNA binding
AC243249.m00006	AC243249.t00006	+	134	LOC_Os03g25110.1	1e-35	expressed protein	Sb01g034510.1	7e-40	unknown protein	GRMZM5G808350_P02	1e-39	hypothetical protein LOC100382085	Bradi1g61630.1	1e-37	unknown protein
AC243249.m00007	AC243249.t00007	-	287	LOC_Os03g25120.1	1e-68	HSF-type DNA-binding domain containing protein, expressed	Sb01g034500.1	8e-86	AT-HSFB4; DNA binding / transcription factor	AC216247.3_FGP001	1e-84		Bradi1g61620.1	8e-65	AT-HSFB4; DNA binding / transcription factor
AC243249.m00008	AC243249.t00008	-	156	LOC_Os03g25130.2	2e-52	OB-fold nucleic acid binding domain containing protein, putative, expressed	Sb01g034490.1	1e-71	STN1; nucleic acid binding	GRMZM2G117779_P01	2e-70	OB-fold nucleic acid binding domain containing protein	Bradi1g61610.2	7e-67
AC243249.m00009	AC243249.t00009	+	17
AC243249.m00010	AC243249.t00010	+	324	LOC_Os03g25140.1	1e-158	peptidyl-prolyl isomerase PASTICCINO1, putative, expressed	Sb01g034480.1	2e-174	PAS1 (PASTICCINO 1); FK506 binding / binding / peptidyl-prolyl cis-trans isomerase	GRMZM2G117746_P01	1e-169	peptidyl-prolyl isomerase PASTICCINO1	Bradi1g61590.1	2e-94	PAS1 (PASTICCINO 1); FK506 binding / binding / peptidyl-prolyl cis-trans isomerase
AC243249.m00011	AC243249.t00011	+	235	LOC_Os03g25150.1	3e-49	transposon protein, putative, unclassified, expressed	Sb01g034470.1	1e-56	TT7 (TRANSPARENT TESTA 7); flavonoid 3\'-monooxygenase/ oxygen binding	GRMZM2G119067_P01	3e-55		Bradi1g61580.1	4e-51	TT7 (TRANSPARENT TESTA 7); flavonoid 3\'-monooxygenase/ oxygen binding
AC243249.m00012	AC243249.t00012	-	972	LOC_Os07g49520.1	0	2-oxoglutarate dehydrogenase E1 component, mitochondrial precursor, putative, expressed	Sb06g013940.1	0	2-oxoglutarate dehydrogenase E1 component, putative / oxoglutarate decarboxylase, putative / alpha-ketoglutaric dehydrogenase, putative	GRMZM2G151169_P01	0	hypothetical protein LOC100383412	Bradi5g08230.5	0
AC243249.m00013	AC243249.t00013	+	319	LOC_Os03g25320.1	2e-116	peroxidase precursor, putative	Sb01g034420.1	1e-106	peroxidase, putative	GRMZM2G168073_P01	3e-104		Bradi1g61550.1	2e-112	peroxidase, putative
AC243249.m00014	AC243249.t00014	-	408	LOC_Os11g24110.1	2e-33	retrotransposon protein, putative, Ty3-gypsy subclass	Sb09g008630.1	2e-25	unknown protein
AC243249.m00015	AC243249.t00015	-	330	LOC_Os03g25320.1	6e-139	peroxidase precursor, putative	Sb01g034420.1	8e-117	peroxidase, putative	GRMZM2G024234_P01	2e-116		Bradi1g61550.1	7e-137	peroxidase, putative
AC243249.m00016	AC243249.t00016	-	667	LOC_Os03g25320.1	2e-137	peroxidase precursor, putative	Sb01g034420.1	3e-108	peroxidase, putative	GRMZM2G024234_P01	4e-109		Bradi1g61550.1	5e-127	peroxidase, putative
AC243249.m00017	AC243249.t00017	+	335	LOC_Os03g25330.1	1e-147	peroxidase precursor, putative, expressed	Sb01g034430.2	2e-163		GRMZM2G040638_P01	2e-161	Peroxidase 2 Precursor (EC 1.11.1.7)(Plasma membrane-bound peroxidase 2)(pmPOX2)	Bradi1g61540.1	1e-142	peroxidase, putative
AC243249.m00018	AC243249.t00018	+	329	LOC_Os03g25360.1	2e-144	peroxidase precursor, putative, expressed	Sb01g034420.1	2e-153	peroxidase, putative	GRMZM2G024234_P01	1e-145		Bradi1g61530.1	4e-137	peroxidase, putative
AC243249.m00019	AC243249.t00019	-	497	LOC_Os03g60080.1	2e-21	NAC domain-containing protein 67, putative, expressed	Sb01g034410.1	2e-44	ATAF2; transcription activator	GRMZM2G347043_P01	6e-22	NAC1 transcription factor	Bradi1g17480.1	1e-21	anac047 (Arabidopsis NAC domain containing protein 47); transcription factor
AC243249.m00020	AC243249.t00020	+	981	LOC_Os03g25380.1	0	pentatricopeptide, putative, expressed	Sb05g001460.1	0	pentatricopeptide (PPR) repeat-containing protein	GRMZM2G020864_P03	0	Pentatricopeptide repeat protein PPR868-14	Bradi1g61520.1	0	pentatricopeptide (PPR) repeat-containing protein
AC243249.m00021	AC243249.t00021	+	166	LOC_Os03g25400.1	1e-75	kinase, putative, expressed	Sb01g034390.1	4e-82	PDK (PYRUVATE DEHYDROGENASE KINASE); ATP binding / histidine phosphotransfer kinase/ pyruvate dehydrogenase (acetyl-transferring) kinase	GRMZM2G107196_P02	7e-81	pyruvate dehydrogenase (lipoamide) kinase1	Bradi1g61500.1	1e-78	PDK (PYRUVATE DEHYDROGENASE KINASE); ATP binding / histidine phosphotransfer kinase/ pyruvate dehydrogenase (acetyl-transferring) kinase
AC243250.m00001	AC243250.t00001	-	351	LOC_Os04g54002.1	2e-106	serine/threonine-protein kinase receptor precursor, putative, expressed	Sb06g029725.1	3e-131	ATP binding / carbohydrate binding / kinase/ protein kinase/ protein serine/threonine kinase/ protein tyrosine kinase/ sugar binding	GRMZM2G010962_P01	2e-115		Bradi5g22980.1	5e-106	B120; ATP binding / protein kinase/ protein serine/threonine kinase/ sugar binding
AC243250.m00002	AC243250.t00002	-	542	LOC_Os04g53994.1	2e-114	kinase, putative, expressed	Sb06g029725.1	1e-95	ATP binding / carbohydrate binding / kinase/ protein kinase/ protein serine/threonine kinase/ protein tyrosine kinase/ sugar binding	GRMZM2G175258_P01	1e-101		Bradi5g22930.1	7e-108	B120; ATP binding / protein kinase/ protein serine/threonine kinase/ sugar binding
AC243250.m00003	AC243250.t00003	-	672	LOC_Os04g54002.1	2e-136	serine/threonine-protein kinase receptor precursor, putative, expressed	Sb06g029725.1	4e-165	ATP binding / carbohydrate binding / kinase/ protein kinase/ protein serine/threonine kinase/ protein tyrosine kinase/ sugar binding	GRMZM2G010962_P01	6e-149		Bradi5g22980.1	7e-134	B120; ATP binding / protein kinase/ protein serine/threonine kinase/ sugar binding
AC243250.m00004	AC243250.t00004	-	351	LOC_Os12g40419.2	2e-51	protein kinase domain containing protein, expressed	Sb08g020880.1	4e-61	lectin protein kinase, putative	GRMZM2G038893_P01	7e-63	WAK-like kinase	Bradi4g02230.1	2e-48	protein kinase family protein
AC243250.m00005	AC243250.t00005	-	44
AC243250.m00006	AC243250.t00006	-	205	LOC_Os04g53998.1	9e-46	kinase, putative, expressed	Sb06g029725.1	2e-57	ATP binding / carbohydrate binding / kinase/ protein kinase/ protein serine/threonine kinase/ protein tyrosine kinase/ sugar binding	GRMZM2G160853_P01	9e-53		Bradi5g22980.1	2e-49	B120; ATP binding / protein kinase/ protein serine/threonine kinase/ sugar binding
AC243250.m00007	AC243250.t00007	-	623	LOC_Os04g53994.1	1e-96	kinase, putative, expressed	Sb02g032130.1	3e-84	S-locus lectin protein kinase family protein	GRMZM2G175258_P01	3e-86		Bradi5g22930.1	6e-92	B120; ATP binding / protein kinase/ protein serine/threonine kinase/ sugar binding
AC243250.m00008	AC243250.t00008	+	492	LOC_Os04g54070.1	1e-139	receptor-like kinase, putative	Sb06g029740.1	2e-174	ATP binding / protein kinase/ protein serine/threonine kinase/ protein tyrosine kinase/ sugar binding	GRMZM2G000620_P01	1e-176	receptor-like kinase	Bradi3g00950.1	6e-179	ATP binding / protein kinase/ protein serine/threonine kinase/ protein tyrosine kinase/ sugar binding
AC243251.m00001	AC243251.t00001	+	662	LOC_Os07g03830.1	0	lectin-like receptor kinase, putative	Sb02g002240.1	0	RLK (receptor lectin kinase); kinase	GRMZM2G328258_P01	0		Bradi1g54170.1	0	RLK (receptor lectin kinase); kinase
AC243251.m00002	AC243251.t00002	-	788	LOC_Os07g03820.1	0	lectin-like receptor kinase, putative, expressed	Sb10g011000.1	0	RLK (receptor lectin kinase); kinase	GRMZM2G142037_P01	0	Putative uncharacterized protein	Bradi1g54160.1	0	RLK (receptor lectin kinase); kinase
AC243251.m00003	AC243251.t00003	+	122	LOC_Os07g15880.1	4e-16	mitochondrial prohibitin complex protein 2, putative, expressed	Sb02g008640.1	3e-18	ATPHB2 (PROHIBITIN 2)	AC217358.3_FGP005	8e-17	prohibitin4	Bradi1g53070.1	1e-15	ATPHB1 (PROHIBITIN 1)
AC243251.m00004	AC243251.t00004	-	162
AC243251.m00005	AC243251.t00005	+	127	LOC_Os07g15680.1	5e-23	phospholipase D, putative, expressed	Sb02g008130.1	3e-23	ATPLDDELTA; phospholipase D	GRMZM2G145944_P01	1e-22		Bradi4g36800.1	1e-19	ATPLDDELTA; phospholipase D
AC243251.m00006	AC243251.t00006	-	228	LOC_Os07g15670.3	3e-66	peroxiredoxin, putative, expressed	Sb02g008120.2	7e-66		GRMZM2G145895_P01	4e-66	hypothetical protein LOC100272300	Bradi1g53100.5	3e-65
AC243251.m00007	AC243251.t00007	+	382	LOC_Os07g13890.1	3e-80	OsFBX230 - F-box domain containing protein, expressed	Sb02g008113.1	8e-55	F-box family protein	GRMZM2G156490_P01	1e-41	hypothetical protein LOC100382083	Bradi1g54770.1	2e-28	F-box family protein
AC243252.m00001	AC243252.t00001	-	681	LOC_Os03g58490.2	2e-124	DUF593 domain containing protein, expressed	Sb01g004990.1	5e-157	unknown protein	GRMZM2G163912_P01	2e-66	seed specific protein Bn15D14A	Bradi2g51510.1	1e-46	unknown protein
AC243252.m00002	AC243252.t00002	-	444	LOC_Os03g58470.1	3e-15	retrotransposon protein, putative, Ty3-gypsy subclass, expressed	Sb01g005010.1	4e-20	histone H1.2	GRMZM2G003002_P03	3e-17	Histone H1	Bradi1g05330.1	1e-16	histone H1, putative
AC243252.m00003	AC243252.t00003	+	154	LOC_Os07g08660.1	7e-78	40S ribosomal protein S15, putative, expressed	Sb02g004720.1	2e-77	40S ribosomal protein S15 (RPS15D)	GRMZM2G111172_P01	3e-77	40S ribosomal protein S15	Bradi1g55280.1	2e-74	40S ribosomal protein S15 (RPS15D)
AC243252.m00004	AC243252.t00004	-	404	LOC_Os03g58420.2	4e-65	OsWRKY6 - Superfamily of TFs having WRKY and zinc finger domains, expressed	Sb01g005070.1	2e-73	WRKY7; calmodulin binding / transcription factor	GRMZM2G164082_P01	4e-123		Bradi1g14300.3	2e-32
AC243252.m00005	AC243252.t00005	-	1804	LOC_Os03g58400.1	0	C-5 cytosine-specific DNA methylase, putative, expressed	Sb01g005084.1	0	MET1 (METHYLTRANSFERASE 1); methyltransferase	GRMZM2G334041_P01	0	DNA methyl transferase1	Bradi1g05380.1	0	MET1 (METHYLTRANSFERASE 1); methyltransferase
AC243252.m00006	AC243252.t00006	-	223				Sb01g005090.1	5e-12	DRIP2 (DREB2A-INTERACTING PROTEIN 2); protein binding / ubiquitin-protein ligase/ zinc ion binding	GRMZM2G457544_P01	2e-11	protein binding protein	Bradi1g05390.1	2e-11	DRIP2 (DREB2A-INTERACTING PROTEIN 2); protein binding / ubiquitin-protein ligase/ zinc ion binding
AC243252.m00007	AC243252.t00007	+	435	LOC_Os06g06740.1	4e-97	MYB family transcription factor, putative, expressed	Sb08g004250.1	1e-140	MYB98 (myb domain protein 98); DNA binding / transcription factor	GRMZM5G870592_P01	3e-124		Bradi2g54640.1	4e-39	MYB3R-5 (MYB DOMAIN PROTEIN 3R-5); DNA binding / transcription factor
AC243252.m00008	AC243252.t00008	+	181	LOC_Os07g08460.1	1e-44	OsIAA24 - Auxin-responsive Aux/IAA gene family member, expressed	Sb01g005110.1	2e-66	SHY2 (SHORT HYPOCOTYL 2); transcription factor	GRMZM5G809195_P01	2e-59	IAA14 - auxin-responsive Aux/IAA family member	Bradi1g05410.1	5e-45	SHY2 (SHORT HYPOCOTYL 2); transcription factor
AC243252.m00009	AC243252.t00009	-	220	LOC_Os03g58340.1	1e-37	expressed protein	Sb01g005120.1	2e-56	unknown protein	GRMZM2G004290_P01	2e-36		Bradi1g05420.2	1e-51
AC243252.m00010	AC243252.t00010	+	122	LOC_Os03g58260.2	2e-29	indole-3-glycerol phosphate lyase, chloroplast precursor, putative, expressed	Sb01g005160.1	2e-31	TSA1 (TRYPTOPHAN SYNTHASE ALPHA CHAIN); tryptophan synthase	GRMZM2G015436_P02	8e-31	Indole-3-glycerol phosphate lyasePutative uncharacterized protein ;	Bradi1g05470.1	3e-26	tryptophan synthase, alpha subunit, putative
AC243252.m00011	AC243252.t00011	+	248	LOC_Os03g58250.1	3e-55	bZIP transcription factor domain containing protein, expressed	Sb01g005170.1	1e-57	BZIP25 (BASIC LEUCINE ZIPPER 25); protein heterodimerization/ transcription factor	GRMZM2G016150_P01	3e-55	opaque2 heterodimerizing protein1	Bradi1g05480.1	8e-50	BZIP25 (BASIC LEUCINE ZIPPER 25); protein heterodimerization/ transcription factor
AC243252.m00012	AC243252.t00012	-	111	LOC_Os03g58240.1	5e-48	GTP binding protein, putative, expressed	Sb01g005180.1	1e-51	guanylate-binding family protein	GRMZM2G305254_P06	1e-53	hypothetical protein LOC100280273	Bradi1g05490.1	5e-48	guanylate-binding family protein
AC243253.m00001	AC243253.t00001	-	320	LOC_Os02g27620.2	5e-79	endonuclease/exonuclease/phosphatase family domain containing protein, expressed	Sb07g026650.1	4e-50	inositol or phosphatidylinositol phosphatase/ inositol-polyphosphate 5-phosphatase	GRMZM2G366698_P01	1e-90	hypothetical protein LOC100194149	Bradi3g43460.1	6e-80	FRA3 (FRAGILE FIBER3); inositol or phosphatidylinositol phosphatase
AC243253.m00002	AC243253.t00002	-	297	LOC_Os09g32440.1	4e-78	endonuclease/exonuclease/phosphatase family domain containing protein, expressed	Sb02g028990.1	3e-77	inositol or phosphatidylinositol phosphatase/ inositol-polyphosphate 5-phosphatase	GRMZM2G366698_P01	2e-132	hypothetical protein LOC100194149	Bradi3g43460.1	6e-116	FRA3 (FRAGILE FIBER3); inositol or phosphatidylinositol phosphatase
AC243253.m00003	AC243253.t00003	-	601	LOC_Os08g41270.1	2e-19	endonuclease/exonuclease/phosphatase family domain containing protein, expressed	Sb07g026650.1	4e-17	inositol or phosphatidylinositol phosphatase/ inositol-polyphosphate 5-phosphatase	GRMZM2G366698_P03	7e-36	hypothetical protein LOC100194149	Bradi3g43460.1	2e-34	FRA3 (FRAGILE FIBER3); inositol or phosphatidylinositol phosphatase
AC243253.m00004	AC243253.t00004	+	125
AC243253.m00005	AC243253.t00005	-	128	LOC_Os12g28210.1	6e-19	retrotransposon, putative, centromere-specific
AC243253.m00006	AC243253.t00006	+	268	LOC_Os08g21840.1	5e-63	50S ribosomal protein L15, putative, expressed	Sb03g012270.1	4e-65	ribosomal protein L15 family protein	GRMZM2G058923_P01	6e-65	hypothetical protein LOC100191689	Bradi3g20440.1	1e-61	ribosomal protein L15 family protein
AC243253.m00007	AC243253.t00007	-	734
AC243253.m00008	AC243253.t00008	-	263	LOC_Os02g27490.2	7e-66	bile acid sodium symporter family protein, putative, expressed	Sb02g030200.2	2e-22		GRMZM2G149619_P01	7e-22	hypothetical protein LOC100303815	Bradi3g43450.1	9e-67	bile acid:sodium symporter family protein
AC243253.m00009	AC243253.t00009	-	508	LOC_Os02g27480.1	0	membrane attack complex component/perforin/complement C9, putative, expressed	Sb04g018940.1	0	unknown protein	GRMZM2G012046_P01	0	hypothetical protein LOC100383384	Bradi3g43420.1	0	unknown protein
AC243253.m00010	AC243253.t00009	-	508	LOC_Os02g27480.1	0	membrane attack complex component/perforin/complement C9, putative, expressed	Sb04g018940.1	0	unknown protein	GRMZM2G012046_P01	0	hypothetical protein LOC100383384	Bradi3g43420.1	0	unknown protein
AC243253.m00011	AC243253.t00010	-	91	LOC_Os02g27480.4	3e-20	membrane attack complex component/perforin/complement C9, putative, expressed	Sb04g018940.1	5e-39	unknown protein	GRMZM2G012046_P01	2e-37	hypothetical protein LOC100383384	Bradi3g43420.1	3e-31	unknown protein
AC243253.m00012	AC243253.t00011	-	289	LOC_Os01g32510.1	1e-14	retrotransposon protein, putative, unclassified
AC243253.m00013	AC243253.t00012	-	211	LOC_Os07g40320.1	3e-14	vesicle transport protein GOT1B, putative, expressed	Sb02g038200.1	1e-22	WPP1 (WPP domain protein 1)	GRMZM2G309970_P01	1e-25	hypothetical protein LOC100304042	Bradi1g22800.1	2e-24	WPP2
AC243254.m00001	AC243254.t00001	-	233
AC243254.m00002	AC243254.t00002	-	25
AC243254.m00003	AC243254.t00003	-	96	LOC_Os04g35380.1	2e-24	expressed protein	Sb06g017010.1	2e-25	unknown protein	GRMZM2G047705_P03	5e-45	hypothetical protein LOC100192738	Bradi5g10400.1	1e-22	unknown protein
AC243254.m00004	AC243254.t00004	+	140	LOC_Os04g35300.1	4e-37	SLL1 protein, putative, expressed	Sb06g017000.1	3e-43	unknown protein	GRMZM2G047512_P02	5e-39	hypothetical protein LOC100272991	Bradi5g10390.1	1e-37	unknown protein
AC243254.m00005	AC243254.t00005	+	419	LOC_Os04g35290.1	0	OsPDIL5-2 protein disulfide isomerase PDIL5-2, expressed	Sb06g016990.1	0	ATPDIL5-2 (PDI-LIKE 5-2); protein disulfide isomerase	GRMZM2G176443_P02	0	protein disulfide isomerase	Bradi5g10380.1	0	ATPDIL5-2 (PDI-LIKE 5-2); protein disulfide isomerase
AC243254.m00006	AC243254.t00006	+	656	LOC_Os04g35280.1	0	neutral/alkaline invertase, putative, expressed	Sb04g029440.1	0	beta-fructofuranosidase, putative / invertase, putative / saccharase, putative / beta-fructosidase, putative	GRMZM2G136139_P01	0	neutral/alkaline invertase	Bradi5g10360.1	0	beta-fructofuranosidase, putative / invertase, putative / saccharase, putative / beta-fructosidase, putative
AC243254.m00007	AC243254.t00007	-	463	LOC_Os02g27769.1	4e-38	40S ribosomal protein S27, putative, expressed	Sb04g019000.1	2e-39	ARS27A (ARABIDOPSIS RIBOSOMAL PROTEIN S27); structural constituent of ribosome	GRMZM2G066222_P01	4e-39	ribosomal protein S27
AC243254.m00008	AC243254.t00008	+	391	LOC_Os04g35260.1	2e-52	DEAD/DEAH box helicase domain containing protein, expressed	Sb06g016980.1	1e-63	helicase domain-containing protein	GRMZM2G013283_P02	5e-59		Bradi5g10330.1	1e-54	helicase domain-containing protein
AC243254.m00009	AC243254.t00009	+	216	LOC_Os04g35260.1	6e-35	DEAD/DEAH box helicase domain containing protein, expressed	Sb06g017220.1	2e-35	helicase domain-containing protein	GRMZM2G013283_P02	6e-34		Bradi5g10330.1	1e-35	helicase domain-containing protein
AC243254.m00010	AC243254.t00010	+	231	LOC_Os08g39160.1	1e-63	formyl transferase, putative, expressed	Sb06g016970.1	3e-74	phosphoribosylglycinamide formyltransferase	GRMZM2G155626_P01	3e-73	hypothetical protein LOC100272448	Bradi5g10310.3	5e-66
AC243254.m00011	AC243254.t00011	-	364	LOC_Os04g35240.1	0	CAMK_CAMK_like.25 - CAMK includes calcium/calmodulin depedent protein kinases, expressed	Sb06g016960.1	0	SNRK2.4 (SNF1-RELATED PROTEIN KINASE 2.4); kinase	GRMZM2G155593_P01	0	LOC100282729	Bradi5g10300.1	5e-180	SNRK2.4 (SNF1-RELATED PROTEIN KINASE 2.4); kinase
AC243254.m00012	AC243254.t00012	+	155	LOC_Os02g29220.1	5e-54	expressed protein	Sb06g016950.1	1e-58	unknown protein	GRMZM2G330424_P01	7e-52	hypothetical protein LOC100382999	Bradi5g10290.1	8e-60	unknown protein
AC243254.m00013	AC243254.t00013	-	300	LOC_Os04g35210.1	2e-28	Leucine Rich Repeat family protein, expressed	Sb06g016947.1	9e-34	disease resistance protein (CC-NBS-LRR class), putative	GRMZM2G029211_P01	4e-22	hypothetical protein LOC100381927	Bradi4g08710.1	3e-33	disease resistance protein (CC-NBS-LRR class), putative
AC243254.m00014	AC243254.t00014	-	55
AC243254.m00015	AC243254.t00015	-	631	LOC_Os10g01060.1	2e-68	protein kinase family protein, putative, expressed	Sb06g017260.1	2e-87	protein kinase family protein / U-box domain-containing protein	GRMZM2G018059_P02	2e-96		Bradi1g61450.1	8e-124	protein kinase family protein / U-box domain-containing protein
AC243254.m00016	AC243254.t00016	-	232	LOC_Os04g35190.1	1e-85	OsFBX133 - F-box domain containing protein, expressed	Sb06g016930.1	3e-91	FBP7 (F-BOX PROTEIN 7)	GRMZM2G117633_P03	7e-91	LOC100285517	Bradi5g10260.1	3e-85	FBP7 (F-BOX PROTEIN 7)
AC243255.m00001	AC243255.t00001	+	421	LOC_Os11g43700.1	1e-26	RGH1A, putative, expressed	Sb05g027300.1	1e-30	disease resistance protein (CC-NBS class), putative	GRMZM2G077068_P01	4e-24		Bradi3g60980.1	1e-25	disease resistance protein (CC-NBS class), putative
AC243255.m00002	AC243255.t00002	+	119	LOC_Os05g51500.1	2e-36	eukaryotic translation initiation factor 5B, putative, expressed	Sb08g016090.1	5e-48	eukaryotic translation initiation factor 2 family protein / eIF-2 family protein	GRMZM2G023418_P01	1e-36	hypothetical protein LOC100384185	Bradi4g06730.1	7e-45	eukaryotic translation initiation factor 2 family protein / eIF-2 family protein
AC243255.m00003	AC243255.t00003	-	379
AC243256.m00001	AC243256.t00001	+	254	LOC_Os03g47760.1	1e-47	SAB, putative, expressed	Sb01g011950.1	6e-56	SAB (SABRE)	GRMZM2G448687_P01	6e-45	aberrant pollen transmission1	Bradi1g12490.1	3e-55	SAB (SABRE)
AC243256.m00002	AC243256.t00002	-	165	LOC_Os03g47770.1	3e-79	ubiquitin-conjugating enzyme E2 W, putative, expressed	Sb01g011940.1	5e-82	ATUBC2-1; ubiquitin-protein ligase	GRMZM2G116840_P04	2e-80	hypothetical protein LOC100193523	Bradi1g12480.1	4e-78	ATUBC2-1; ubiquitin-protein ligase
AC243256.m00003	AC243256.t00003	+	274	LOC_Os03g47780.1	5e-81	WD repeat-containing protein, putative, expressed	Sb05g023230.1	3e-85	transducin family protein / WD-40 repeat family protein	GRMZM2G094959_P05	4e-64	hypothetical protein LOC100191700	Bradi2g60690.1	2e-83	transducin family protein / WD-40 repeat family protein
AC243256.m00004	AC243256.t00004	-	522	LOC_Os03g47790.3	0	transposon protein, putative, unclassified, expressed	Sb01g011920.2	0		GRMZM2G003607_P01	0	transposon protein	Bradi1g12470.2	0
AC243256.m00005	AC243256.t00005	-	311	LOC_Os03g47800.1	8e-61	RNA recognition motif containing protein, expressed	Sb01g011910.1	3e-72	glycine-rich RNA-binding protein	GRMZM2G083783_P01	1e-72	hypothetical protein LOC100381912	Bradi1g12460.1	6e-61	glycine-rich RNA-binding protein
AC243256.m00006	AC243256.t00006	-	422	LOC_Os09g08190.1	2e-71	sulfotransferase domain containing protein, expressed	Sb01g011900.1	5e-110	SOT18 (DESULFO-GLUCOSINOLATE SULFOTRANSFERASE 18); 3-methylthiopropyl-desulfoglucosinolate sulfotransferase/ 4-methylthiobutyl-desulfoglucosinolate sulfotransferase/ 5-methylthiopentyl-desulfoglucosinolate sulfotransferase/ 7-methylthioheptyl-desulfogluco	GRMZM2G341959_P02	7e-115	flavonol 4-sulfotransferase	Bradi4g08950.1	7e-92	sulfotransferase family protein
AC243256.m00007	AC243256.t00007	-	755	LOC_Os03g47810.1	0	nodulin family protein, putative, expressed	Sb01g011890.1	0	nodulin family protein	GRMZM2G467893_P01	0	hypothetical protein LOC100273339	Bradi1g12440.1	0	nodulin family protein
AC243256.m00008	AC243256.t00008	-	885	LOC_Os03g47830.1	2e-53	argonaute, putative, expressed	Sb01g011880.1	4e-62	AGO1 (ARGONAUTE 1); endoribonuclease/ miRNA binding / protein binding / siRNA binding	GRMZM2G461936_P01	2e-62	hypothetical protein LOC100384259	Bradi1g05160.1	2e-49	AGO1 (ARGONAUTE 1); endoribonuclease/ miRNA binding / protein binding / siRNA binding
AC243256.m00009	AC243256.t00009	-	679	LOC_Os03g47830.1	1e-62	argonaute, putative, expressed	Sb01g011870.1	6e-68	AGO1 (ARGONAUTE 1); endoribonuclease/ miRNA binding / protein binding / siRNA binding	GRMZM2G461936_P01	3e-60	hypothetical protein LOC100384259	Bradi1g12430.1	2e-52	AGO5 (ARGONAUTE 5); nucleic acid binding
AC243257.m00001	AC243257.t00001	+	470
AC243257.m00002	AC243257.t00002	-	302	LOC_Os02g49470.1	8e-53	tic20 protein-related, putative, expressed				GRMZM2G317451_P01	9e-59	hypothetical protein LOC100193921 (LOC100193921), mRNA	Bradi3g56350.1	1e-52	unknown protein
AC243257.m00003	AC243257.t00003	-	359	LOC_Os06g17390.1	2e-98	auxin-independent growth promoter protein, putative, expressed	Sb04g029280.1	6e-102	unknown protein	GRMZM2G020285_P01	4e-103		Bradi1g43560.1	2e-100	unknown protein
AC243257.m00004	AC243257.t00004	-	306	LOC_Os02g49450.1	2e-108	BSD domain-containing protein, putative, expressed	Sb04g029290.1	8e-115	BSD domain-containing protein	GRMZM2G127548_P01	1e-112	BSD domain containing proteinPutative uncharacterized protein ;	Bradi3g56370.1	2e-107	BSD domain-containing protein
AC243257.m00005	AC243257.t00005	-	129	LOC_Os02g49450.1	1e-23	BSD domain-containing protein, putative, expressed	Sb04g029290.1	4e-28	BSD domain-containing protein	GRMZM2G127548_P01	2e-26	BSD domain containing proteinPutative uncharacterized protein ;	Bradi3g56370.1	1e-22	BSD domain-containing protein
AC243257.m00006	AC243257.t00006	-	178	LOC_Os02g49450.1	1e-65	BSD domain-containing protein, putative, expressed	Sb04g029290.1	3e-67	BSD domain-containing protein	GRMZM2G127548_P01	1e-66	BSD domain containing proteinPutative uncharacterized protein ;	Bradi3g56370.1	2e-65	BSD domain-containing protein
AC243257.m00007	AC243257.t00007	+	284	LOC_Os02g49440.1	3e-35	dof zinc finger domain containing protein, putative, expressed	Sb04g029300.1	3e-37	OBP4; DNA binding / transcription factor	GRMZM2G394941_P01	1e-36		Bradi3g56380.1	7e-29	OBP4; DNA binding / transcription factor
AC243257.m00008	AC243257.t00008	-	273	LOC_Os02g49360.1	4e-26	RNA methyltransferase domain-containing protein 2, putative, expressed	Sb04g029360.1	1e-29	unknown protein	GRMZM2G312944_P01	4e-26	hypothetical protein LOC100383580	Bradi3g56410.1	8e-25	unknown protein
AC243257.m00009	AC243257.t00009	+	206	LOC_Os02g49350.1	7e-29	plastocyanin-like domain containing protein, putative, expressed	Sb10g010730.1	1e-28	plastocyanin-like domain-containing protein	GRMZM2G011951_P01	1e-47	uclacyanin-2	Bradi5g25890.1	1e-26	plastocyanin-like domain-containing protein
AC243257.m00010	AC243257.t00010	-	453	LOC_Os02g48870.1	8e-132	aspartic proteinase nepenthesin-2 precursor, putative, expressed	Sb04g029400.1	3e-175	chloroplast nucleoid DNA-binding protein, putative	GRMZM2G124684_P01	2e-172	aspartic proteinase nepenthesin-2	Bradi3g53620.1	1e-114	chloroplast nucleoid DNA-binding protein, putative
AC243257.m00011	AC243257.t00011	+	317	LOC_Os04g15800.1	2e-122	expressed protein	Sb06g003210.1	3e-133	unknown protein	GRMZM2G177596_P01	2e-128	hypothetical protein LOC100191331	Bradi5g04060.1	8e-90	unknown protein
AC243257.m00012	AC243257.t00012	+	88	LOC_Os02g49340.1	9e-26	nitrate-induced NOI protein, putative, expressed	Sb04g029410.1	5e-39	nitrate-responsive NOI protein, putative	GRMZM2G011951_P03	1e-33	uclacyanin-2	Bradi1g43430.1	4e-25	unknown protein
AC243257.m00013	AC243257.t00012	+	87	LOC_Os02g49340.1	2e-24	nitrate-induced NOI protein, putative, expressed	Sb04g029410.1	4e-37	nitrate-responsive NOI protein, putative	GRMZM2G377161_P01	9e-32		Bradi1g43430.1	1e-25	unknown protein
AC243257.m00014	AC243257.t00013	-	513	LOC_Os02g49332.2	2e-80	CSLE2 - cellulose synthase-like family E, expressed	Sb04g029420.1	1e-84	ATCSLE1; cellulose synthase/ transferase, transferring glycosyl groups	GRMZM2G012044_P01	7e-82		Bradi3g56440.1	2e-79	ATCSLE1; cellulose synthase/ transferase, transferring glycosyl groups
AC243257.m00015	AC243257.t00014	-	243	LOC_Os02g49332.1	2e-94	CSLE2 - cellulose synthase-like family E, expressed	Sb04g029420.1	1e-103	ATCSLE1; cellulose synthase/ transferase, transferring glycosyl groups	GRMZM2G012044_P01	9e-104		Bradi3g56440.1	3e-84	ATCSLE1; cellulose synthase/ transferase, transferring glycosyl groups
AC243257.m00016	AC243257.t00015	-	376	LOC_Os02g49326.1	8e-105	SET domain-containing protein, putative, expressed	Sb04g029430.1	7e-107	SET domain-containing protein	GRMZM2G077258_P03	5e-108	hypothetical protein LOC100272441	Bradi3g56450.4	2e-130
AC243257.m00017	AC243257.t00016	+	374	LOC_Os02g49320.1	7e-126	sucrase-related, putative, expressed	Sb04g029450.1	2e-145	sucrase-related	GRMZM2G020775_P01	2e-140	hypothetical protein LOC100193791	Bradi3g56460.1	4e-136	sucrase-related
AC243257.m00018	AC243257.t00017	-	561	LOC_Os02g49310.1	0	AGC_PVPK_like_kin82y.7 - ACG kinases include homologs to PKA, PKG and PKC, expressed	Sb04g029460.1	0	D6PKL2 (D6 PROTEIN KINASE LIKE 2); kinase	GRMZM2G020938_P03	0	LOC100281711	Bradi1g43350.1	0	D6PKL2 (D6 PROTEIN KINASE LIKE 2); kinase
AC243257.m00019	AC243257.t00018	-	233	LOC_Os02g49260.1	5e-50	transporter-related, putative, expressed	Sb04g029470.1	6e-50	transporter-related	GRMZM2G075372_P01	6e-49	hypothetical protein LOC100191213	Bradi3g56480.1	2e-49	transporter-related
AC243257.m00020	AC243257.t00019	-	243				Sb04g029480.1	2e-14	COL9 (CONSTANS-LIKE 9); transcription factor/ zinc ion binding	GRMZM2G042198_P01	3e-13	hypothetical protein LOC100193195	Bradi3g56490.3	1e-11
AC243257.m00021	AC243257.t00020	+	364							AC189883.3_FGP002	1e-10
AC243258.m00001	AC243258.t00001	+	256				Sb01g017450.1	2e-35	plastid-lipid associated protein PAP / fibrillin family protein	GRMZM2G026800_P01	6e-23		Bradi3g30740.3	1e-32
AC243258.m00002	AC243258.t00002	-	126				Sb01g017440.1	1e-12	LSU4 (RESPONSE TO LOW SULFUR 4)	GRMZM2G339562_P01	9e-11	hypothetical protein LOC100274353	Bradi3g30730.1	3e-11
AC243258.m00003	AC243258.t00003	+	377	LOC_Os11g06390.6	0	actin, putative, expressed	Sb01g017430.1	0	ACT7 (ACTIN 7); structural constituent of cytoskeleton	GRMZM2G082484_P01	0	hypothetical protein LOC100381643	Bradi3g30710.2	0
AC243258.m00004	AC243258.t00004	+	377	LOC_Os08g08140.1	9e-67	receptor-like kinase, putative, expressed	Sb01g017420.1	3e-69	S-locus lectin protein kinase family protein	GRMZM2G330751_P01	2e-88		Bradi3g15480.1	4e-69	ARK3 (A. THALIANA RECEPTOR KINASE 3); kinase/ transmembrane receptor protein serine/threonine kinase
AC243258.m00005	AC243258.t00005	+	304				Sb01g017400.1	2e-15	unknown protein	GRMZM2G475956_P01	2e-11	hypothetical protein LOC100275132	Bradi3g30690.1	8e-11	unknown protein
AC243258.m00006	AC243258.t00006	-	380	LOC_Os10g36680.1	2e-122	ubiquitin carboxyl-terminal hydrolase, family 1, putative, expressed	Sb01g017350.1	2e-147	ubiquitin thiolesterase	GRMZM2G172451_P01	3e-150		Bradi3g30680.1	3e-130	ubiquitin thiolesterase
AC243258.m00007	AC243258.t00007	+	638	LOC_Os10g36690.4	0	dehydration response related protein, putative, expressed	Sb01g017340.1	0	dehydration-responsive family protein	GRMZM2G114570_P04	0	ankyrin protein kinase-like	Bradi3g30670.3	0
AC243258.m00008	AC243258.t00008	-	94
AC243258.m00009	AC243258.t00009	-	354	LOC_Os10g36703.1	9e-40	CPuORF40 - conserved peptide uORF-containing transcript, expressed	Sb01g017330.1	2e-40	auxin-responsive family protein	GRMZM2G113135_P01	2e-42	hypothetical protein LOC100191931	Bradi3g30660.1	9e-39	auxin-responsive family protein
AC243258.m00010	AC243258.t00010	-	406	LOC_Os10g36710.1	1e-74	CAMK_CAMK_like.40 - CAMK includes calcium/calmodulin depedent protein kinases, expressed	Sb01g017320.1	1e-76	calcium-dependent protein kinase, putative / CDPK, putative	GRMZM2G031893_P01	1e-77		Bradi3g30650.1	2e-63	calcium-dependent protein kinase, putative / CDPK, putative
AC243259.m00001	AC243259.t00001	+	144	LOC_Os03g57760.2	4e-79	25.3 kDa vesicle transport protein, putative, expressed	Sb01g005550.1	7e-81	SEC22; transporter	GRMZM2G120596_P02	2e-80		Bradi2g08010.1	1e-78	SEC22; transporter
AC243259.m00002	AC243259.t00002	-	654	LOC_Os01g40094.1	5e-141	protein phosphatase 2C, putative, expressed	Sb03g026070.1	2e-79	HAB2; catalytic/ protein serine/threonine phosphatase	GRMZM2G134628_P01	2e-75	protein phosphatase 2C ABI2	Bradi2g14420.1	2e-98	HAB1 (HOMOLOGY TO ABI1); catalytic/ protein serine/threonine phosphatase
AC243259.m00003	AC243259.t00003	+	142	LOC_Os03g48140.1	3e-34	myosin, putative, expressed	Sb03g026110.1	3e-40	MYA2 (ARABIDOPSIS MYOSIN 2); GTP-dependent protein binding / Rab GTPase binding / motor	AC155377.1_FGP001	2e-38	myosin1	Bradi2g41980.2	1e-35
AC243260.m00001	AC243260.t00001	+	801	LOC_Os03g49770.1	0	oxysterol-binding protein, putative, expressed	Sb01g010720.1	0	ORP1C (OSBP(OXYSTEROL BINDING PROTEIN)-RELATED PROTEIN 1C); oxysterol binding / phosphoinositide binding	GRMZM2G147332_P01	0		Bradi1g11030.1	0	ORP1C (OSBP(OXYSTEROL BINDING PROTEIN)-RELATED PROTEIN 1C); oxysterol binding / phosphoinositide binding
AC243260.m00002	AC243260.t00002	-	724	LOC_Os03g49800.1	0	phosphatidylinositol-4-phosphate 5-kinase, putative, expressed	Sb01g010710.1	0	ATPIP5K1 (PHOSPHATIDYLINOSITOL-4-PHOSPHATE 5-KINASE 1); 1-phosphatidylinositol-4-phosphate 5-kinase/ actin filament binding / actin monomer binding / phosphatidylinositol phosphate kinase	GRMZM2G157147_P01	0	hypothetical protein LOC100216938	Bradi1g11040.1	0	ATPIP5K1 (PHOSPHATIDYLINOSITOL-4-PHOSPHATE 5-KINASE 1); 1-phosphatidylinositol-4-phosphate 5-kinase/ actin filament binding / actin monomer binding / phosphatidylinositol phosphate kinase
AC243260.m00003	AC243260.t00003	-	1198				Sb08g019850.1	6e-13
AC243260.m00004	AC243260.t00004	+	428	LOC_Os03g49830.1	4e-86	expressed protein	Sb01g010700.1	3e-114	unknown protein	GRMZM2G090435_P01	9e-109	Putative uncharacterized protein Z195D10.15	Bradi1g11050.1	4e-76	unknown protein
AC243260.m00005	AC243260.t00005	+	119
AC243260.m00006	AC243260.t00006	+	187	LOC_Os02g12630.1	2e-31	retrotransposon protein, putative, Ty3-gypsy subclass	Sb03g037190.1	2e-15	pentatricopeptide (PPR) repeat-containing protein	GRMZM2G085433_P01	2e-16		Bradi5g02420.1	2e-20	nucleic acid binding
AC243260.m00007	AC243260.t00007	-	677
AC243260.m00008	AC243260.t00008	+	371	LOC_Os03g49880.1	9e-52	TCP family transcription factor, putative, expressed	Sb01g010690.1	2e-74	TCP12 (TCP DOMAIN PROTEIN 12); transcription factor	AC233950.1_FGP002	1e-78	Transcription factor TEOSINTE BRANCHED 1	Bradi1g11060.1	1e-39	TCP12 (TCP DOMAIN PROTEIN 12); transcription factor
AC243260.m00009	AC243260.t00009	-	89
AC243261.m00001	AC243261.t00001	-	329	LOC_Os02g19310.1	4e-37	retrotransposon protein, putative, Ty3-gypsy subclass	Sb05g016840.1	2e-47	unknown protein
AC243261.m00002	AC243261.t00002	+	217	LOC_Os09g31140.1	4e-19	ZOS9-16 - C2H2 zinc finger protein, expressed	Sb10g024040.1	4e-39	NTT (NO TRANSMITTING TRACT); nucleic acid binding / transcription factor/ zinc ion binding	GRMZM2G435357_P01	1e-38		Bradi1g36070.1	4e-23	NTT (NO TRANSMITTING TRACT); nucleic acid binding / transcription factor/ zinc ion binding
AC243261.m00003	AC243261.t00003	+	142	LOC_Os06g40960.1	3e-71	ZOS6-05 - C2H2 zinc finger protein, expressed	Sb10g024040.1	1e-71	NTT (NO TRANSMITTING TRACT); nucleic acid binding / transcription factor/ zinc ion binding	GRMZM2G435357_P01	1e-71		Bradi1g36070.1	1e-69	NTT (NO TRANSMITTING TRACT); nucleic acid binding / transcription factor/ zinc ion binding
AC243261.m00004	AC243261.t00004	+	366	LOC_Os12g05920.1	6e-88	ZOS12-01 - C2H2 zinc finger protein, expressed	Sb03g028750.1	5e-86		GRMZM2G433333_P02	4e-140	hypothetical protein LOC100216556	Bradi4g42220.2	7e-98
AC243261.m00005	AC243261.t00005	-	333	LOC_Os01g12810.4	3e-76	retrotransposon protein, putative, unclassified, expressed	Sb02g027050.1	2e-115	protein kinase family protein	GRMZM2G003869_P01	3e-111	hypothetical protein LOC100273524	Bradi2g07630.1	3e-76	pentatricopeptide (PPR) repeat-containing protein
AC243261.m00006	AC243261.t00006	-	426	LOC_Os01g12810.4	1e-102	retrotransposon protein, putative, unclassified, expressed	Sb02g027050.1	6e-133	protein kinase family protein	GRMZM2G003869_P01	2e-134	hypothetical protein LOC100273524	Bradi2g07630.1	7e-87	pentatricopeptide (PPR) repeat-containing protein
AC243261.m00007	AC243261.t00007	-	633	LOC_Os01g19280.1	1e-28	expressed protein	Sb05g007380.1	1e-38		GRMZM2G103759_P01	5e-36	hypothetical protein LOC100279579
AC243261.m00008	AC243261.t00008	-	391	LOC_Os06g22520.1	2e-16	retrotransposon protein, putative, Ty3-gypsy subclass				GRMZM2G393157_P01	1e-77
AC243261.m00009	AC243261.t00009	-	658	LOC_Os06g41020.1	3e-116	DUF1680 domain containing protein, putative, expressed	Sb10g024070.1	3e-132	catalytic	GRMZM5G885766_P01	2e-108		Bradi1g36030.1	1e-94	catalytic
AC243261.m00010	AC243261.t00010	-	472	LOC_Os02g10260.1	9e-13	outer membrane protein, OMP85 family protein, expressed	Sb04g006590.1	1e-15	OEP80 (OUTER ENVELOPE PROTEIN OF 80 KDA)	GRMZM2G130064_P01	2e-15		Bradi3g07090.2	9e-16
AC243261.m00011	AC243261.t00011	-	884	LOC_Os06g41030.1	0	DUF1680 domain containing protein, putative, expressed	Sb10g024080.1	0	catalytic	GRMZM2G000566_P01	0	hypothetical protein LOC100384546	Bradi3g07050.1	0	catalytic

## Sheet: Gene loci
LocusID	Rice hit	Sorghum hit	Maize hit	Brachy hit			LocusID	Rice hit	Sorghum hit	Maize hit	Brachy hit
AC243215.t00001	0	0	0	0			AC243215.t00001	LOC_Os01g03710.1	Sb0013s006040.1	AC155377.1_FGP001	Bradi1g05160.1
AC243216.t00001	LOC_Os11g08380.1	Sb05g005710.1	GRMZM5G854264_P01	Bradi4g23500.1			AC243216.t00001	LOC_Os01g12810.4	Sb01g004990.1	AC185108.3_FGP011	Bradi1g05330.1
AC243216.t00002	LOC_Os04g24040.1	0	0	0			AC243216.t00002	LOC_Os01g12810.4	Sb01g005010.1	AC189883.3_FGP002	Bradi1g05380.1
AC243216.t00003	LOC_Os04g37790.2	Sb06g018430.1	GRMZM2G703021_P01	Bradi5g11930.1			AC243216.t00003	LOC_Os01g17240.1	Sb01g005070.1	AC190767.2_FGP001	Bradi1g05390.1
AC243216.t00004	LOC_Os11g08400.1	Sb05g005700.1	GRMZM2G375856_P01	Bradi4g41140.1			AC243216.t00004	LOC_Os01g19280.1	Sb01g005084.1	AC191380.3_FGP001	Bradi1g05410.1
AC243216.t00005	LOC_Os11g08410.1	Sb05g001890.1	GRMZM2G025002_P01	Bradi4g23550.1			AC243216.t00005	LOC_Os01g23970.1	Sb01g005090.1	AC191380.3_FGP001	Bradi1g05420.2
AC243216.t00006	LOC_Os06g48610.1	Sb10g028840.1	GRMZM2G064050_P01	Bradi1g34060.1			AC243216.t00006	LOC_Os01g27890.1	Sb01g005110.1	AC195785.3_FGP004	Bradi1g05470.1
AC243216.t00007	LOC_Os06g02480.1	Sb10g001250.1	GRMZM2G095211_P01	0			AC243216.t00007	LOC_Os01g32510.1	Sb01g005120.1	AC198324.3_FGP003	Bradi1g05480.1
AC243217.t00001	LOC_Os09g36320.1	Sb02g030970.1	GRMZM5G879570_P02	Bradi4g36140.1			AC243217.t00001	LOC_Os01g34960.1	Sb01g005160.1	AC209208.3_FGP002	Bradi1g05490.1
AC243217.t00002	0	Sb0013s006040.1	0	0			AC243217.t00002	LOC_Os01g34960.1	Sb01g005170.1	AC215260.3_FGP001	Bradi1g06110.1
AC243217.t00003	LOC_Os09g36340.1	Sb04g001756.1	GRMZM2G365613_P01	Bradi1g68000.2			AC243217.t00003	LOC_Os01g40050.2	Sb01g005180.1	AC216247.3_FGP001	Bradi1g06520.3
AC243217.t00004	LOC_Os09g36350.1	Sb02g030990.1	GRMZM2G147422_P01	Bradi4g36240.1			AC243217.t00004	LOC_Os01g40070.1	Sb01g005550.1	AC217358.3_FGP005	Bradi1g10150.1
AC243217.t00005	LOC_Os09g36360.1	Sb02g031000.1	GRMZM2G147454_P01	Bradi4g36250.1			AC243217.t00005	LOC_Os01g40094.1	Sb01g005550.1	AC225193.3_FGP004	Bradi1g11030.1
AC243217.t00006	LOC_Os08g43470.1	Sb02g031010.1	GRMZM2G147459_P01	Bradi4g36280.1			AC243217.t00006	LOC_Os01g40094.1	Sb01g008110.1	AC233950.1_FGP002	Bradi1g11040.1
AC243217.t00007	LOC_Os09g36440.1	Sb02g031020.1	GRMZM2G002828_P01	Bradi4g36290.1			AC243217.t00007	LOC_Os01g40110.1	Sb01g009560.1	AC234152.1_FGP005	Bradi1g11050.1
AC243217.t00008	LOC_Os09g36450.2	Sb02g031030.1	GRMZM5G852968_P03	Bradi4g36310.1			AC243217.t00008	LOC_Os01g40190.1	Sb01g010690.1	GRMZM2G000566_P01	Bradi1g11060.1
AC243217.t00009	LOC_Os02g26850.1	Sb02g031040.1	GRMZM2G135782_P02	Bradi3g56710.1			AC243217.t00009	LOC_Os01g64910.1	Sb01g010700.1	GRMZM2G000620_P01	Bradi1g12430.1
AC243217.t00010	LOC_Os02g26850.1	Sb02g031040.1	GRMZM2G135782_P02	Bradi3g56710.1			AC243217.t00010	LOC_Os01g65480.1	Sb01g010710.1	GRMZM2G002828_P01	Bradi1g12440.1
AC243217.t00011	0	0	0	0			AC243217.t00011	LOC_Os01g71800.1	Sb01g010720.1	GRMZM2G002851_P01	Bradi1g12460.1
AC243217.t00012	LOC_Os09g36480.1	Sb02g031060.1	GRMZM2G050714_P01	Bradi4g36330.2			AC243217.t00012	LOC_Os01g72420.1	Sb01g011870.1	GRMZM2G003002_P03	Bradi1g12470.2
AC243217.t00013	LOC_Os09g36490.1	Sb02g031070.1	GRMZM2G150674_P01	0			AC243217.t00013	LOC_Os02g03890.1	Sb01g011880.1	GRMZM2G003607_P01	Bradi1g12480.1
AC243217.t00014	LOC_Os09g28890.2	Sb07g023250.1	AC225193.3_FGP004	Bradi3g38330.1			AC243217.t00014	LOC_Os02g03980.1	Sb01g011890.1	GRMZM2G003869_P01	Bradi1g12490.1
AC243217.t00015	LOC_Os04g21840.1	0	0	0			AC243217.t00015	LOC_Os02g09270.1	Sb01g011900.1	GRMZM2G003869_P01	Bradi1g14300.3
AC243217.t00016	LOC_Os09g36500.1	Sb02g031080.1	GRMZM2G449875_P01	Bradi4g36360.1			AC243217.t00016	LOC_Os02g09720.1	Sb01g011910.1	GRMZM2G004290_P01	Bradi1g17450.1
AC243218.t00001	LOC_Os11g42630.1	0	GRMZM2G393157_P01	0			AC243218.t00001	LOC_Os02g09720.1	Sb01g011920.2	GRMZM2G006117_P01	Bradi1g17460.1
AC243218.t00002	LOC_Os04g46820.1	Sb06g024780.1	GRMZM2G406313_P01	Bradi1g78240.1			AC243218.t00002	LOC_Os02g10260.1	Sb01g011940.1	GRMZM2G006416_P01	Bradi1g17480.1
AC243218.t00003	LOC_Os04g46810.1	Sb06g024790.1	GRMZM2G410338_P01	Bradi1g78250.2			AC243218.t00003	LOC_Os02g12630.1	Sb01g011950.1	GRMZM2G008305_P01	Bradi1g17810.1
AC243218.t00004	0	0	0	0			AC243218.t00004	LOC_Os02g13330.1	Sb01g017320.1	GRMZM2G009871_P02	Bradi1g18390.1
AC243218.t00005	LOC_Os06g08350.1	Sb10g005530.1	GRMZM2G008305_P01	Bradi1g47450.1			AC243218.t00005	LOC_Os02g14090.1	Sb01g017330.1	GRMZM2G010548_P01	Bradi1g18420.1
AC243218.t00006	LOC_Os02g44680.1	Sb04g032390.1	GRMZM2G362848_P01	Bradi3g51350.1			AC243218.t00006	LOC_Os02g18000.1	Sb01g017340.1	GRMZM2G010962_P01	Bradi1g18450.2
AC243218.t00007	LOC_Os02g44670.1	Sb04g032400.1	GRMZM2G362904_P01	Bradi3g51360.1			AC243218.t00007	LOC_Os02g18070.1	Sb01g017350.1	GRMZM2G010962_P01	Bradi1g18450.2
AC243218.t00008	LOC_Os02g44642.1	Sb04g032420.1	GRMZM2G093316_P02	Bradi3g51380.1			AC243218.t00008	LOC_Os02g18090.1	Sb01g017400.1	GRMZM2G011951_P01	Bradi1g18470.1
AC243218.t00009	0	0	0	0			AC243218.t00009	LOC_Os02g18090.1	Sb01g017420.1	GRMZM2G011951_P03	Bradi1g18490.3
AC243218.t00010	LOC_Os02g44630.2	Sb04g032430.1	AC209208.3_FGP002	Bradi5g18170.1			AC243218.t00010	LOC_Os02g18090.1	Sb01g017430.1	GRMZM2G012044_P01	Bradi1g18510.1
AC243218.t00011	LOC_Os02g44610.1	Sb04g032440.1	GRMZM2G310410_P01	Bradi3g51400.1			AC243218.t00011	LOC_Os02g19310.1	Sb01g017440.1	GRMZM2G012044_P01	Bradi1g18510.1
AC243218.t00012	LOC_Os02g44610.1	Sb04g032440.1	GRMZM2G310410_P01	Bradi3g51400.1			AC243218.t00012	LOC_Os02g19620.1	Sb01g017450.1	GRMZM2G012046_P01	Bradi1g18550.2
AC243218.t00013	LOC_Os06g06760.3	Sb10g004400.1	GRMZM2G349344_P01	Bradi3g51400.1			AC243218.t00013	LOC_Os02g26850.1	Sb01g022710.1	GRMZM2G012046_P01	Bradi1g18570.1
AC243219.t00001	LOC_Os02g18090.1	Sb04g011040.1	GRMZM2G111022_P01	Bradi3g10380.1			AC243219.t00001	LOC_Os02g26850.1	Sb01g028180.1	GRMZM2G012865_P01	Bradi1g19840.1
AC243219.t00002	LOC_Os02g18070.1	Sb08g020630.1	GRMZM2G116335_P01	Bradi3g10370.1			AC243219.t00002	LOC_Os02g27480.1	Sb01g028270.1	GRMZM2G013283_P02	Bradi1g19860.1
AC243219.t00003	LOC_Os07g44540.1	0	0	0			AC243219.t00003	LOC_Os02g27480.4	Sb01g028460.1	GRMZM2G013283_P02	Bradi1g20970.1
AC243219.t00004	LOC_Os02g18090.1	Sb04g011040.1	GRMZM2G111022_P01	Bradi3g10380.1			AC243219.t00004	LOC_Os02g27490.2	Sb01g028470.1	GRMZM2G015436_P02	Bradi1g22690.1
AC243219.t00005	LOC_Os02g18000.1	Sb08g020630.1	GRMZM2G116335_P01	Bradi3g10370.1			AC243219.t00005	LOC_Os02g27620.2	Sb01g028480.1	GRMZM2G016150_P01	Bradi1g22800.1
AC243219.t00006	LOC_Os02g18090.1	Sb04g011040.1	GRMZM2G111022_P01	Bradi3g10380.1			AC243219.t00006	LOC_Os02g27769.1	Sb01g034390.1	GRMZM2G018024_P01	Bradi1g22860.1
AC243220.t00001	LOC_Os04g43760.1	Sb06g022740.1	GRMZM2G441347_P01	Bradi3g49250.2			AC243220.t00001	LOC_Os02g29220.1	Sb01g034410.1	GRMZM2G018059_P02	Bradi1g22870.1
AC243220.t00002	LOC_Os07g45970.1	Sb01g008110.1	GRMZM2G474853_P01	Bradi3g49230.1			AC243220.t00002	LOC_Os02g29960.1	Sb01g034420.1	GRMZM2G020285_P01	Bradi1g22890.1
AC243220.t00003	LOC_Os04g43750.2	Sb06g022730.1	GRMZM2G089767_P01	Bradi5g15820.1			AC243220.t00003	LOC_Os02g29960.1	Sb01g034420.1	GRMZM2G020409_P01	Bradi1g22910.1
AC243220.t00004	LOC_Os04g43740.1	Sb06g022720.1	GRMZM2G089806_P01	Bradi5g15810.1			AC243220.t00004	LOC_Os02g29960.1	Sb01g034420.1	GRMZM2G020775_P01	Bradi1g22920.1
AC243220.t00005	LOC_Os06g26150.1	0	GRMZM2G393157_P01	0			AC243220.t00005	LOC_Os02g30460.1	Sb01g034420.1	GRMZM2G020864_P03	Bradi1g22930.1
AC243220.t00006	LOC_Os04g43730.1	Sb06g022700.1	GRMZM2G145109_P01	Bradi5g15800.1			AC243220.t00006	LOC_Os02g30470.1	Sb01g034430.2	GRMZM2G020938_P03	Bradi1g22940.1
AC243220.t00007	LOC_Os04g43730.1	Sb06g022700.1	GRMZM2G145045_P01	Bradi5g15800.1			AC243220.t00007	LOC_Os02g30610.2	Sb01g034470.1	GRMZM2G023418_P01	Bradi1g25740.1
AC243220.t00008	0	0	0	0			AC243220.t00008	LOC_Os02g30620.3	Sb01g034480.1	GRMZM2G024234_P01	Bradi1g25900.1
AC243220.t00009	LOC_Os04g43730.1	Sb06g022700.1	GRMZM2G145045_P01	Bradi5g15800.1			AC243220.t00009	LOC_Os02g30630.2	Sb01g034490.1	GRMZM2G024234_P01	Bradi1g31010.1
AC243220.t00010	LOC_Os02g41580.1	Sb06g022690.1	GRMZM2G049541_P01	Bradi5g15790.1			AC243220.t00010	LOC_Os02g30650.1	Sb01g034500.1	GRMZM2G024234_P01	Bradi1g33290.1
AC243220.t00011	LOC_Os02g41520.1	Sb06g022680.1	GRMZM2G166903_P01	Bradi5g15780.1			AC243220.t00011	LOC_Os02g35200.1	Sb01g034510.1	GRMZM2G025002_P01	Bradi1g33300.1
AC243220.t00012	0	Sb06g022670.1	0	0			AC243220.t00012	LOC_Os02g41520.1	Sb01g034520.1	GRMZM2G026737_P01	Bradi1g33310.1
AC243220.t00013	LOC_Os04g43690.2	Sb06g022670.1	GRMZM2G030275_P04	Bradi5g15770.1			AC243220.t00013	LOC_Os02g41580.1	Sb01g034530.1	GRMZM2G026800_P01	Bradi1g33310.1
AC243221.t00001	LOC_Os12g19960.1	0	0	0			AC243221.t00001	LOC_Os02g44500.1	Sb01g034710.1	GRMZM2G026879_P01	Bradi1g33320.3
AC243221.t00002	0	0	0	0			AC243221.t00002	LOC_Os02g44610.1	Sb01g035420.1	GRMZM2G026881_P01	Bradi1g34060.1
AC243221.t00003	0	0	GRMZM2G571942_P01	0			AC243221.t00003	LOC_Os02g44610.1	Sb01g040210.1	GRMZM2G029211_P01	Bradi1g35090.1
AC243221.t00004	LOC_Os07g12060.1	0	AC191380.3_FGP001	0			AC243221.t00004	LOC_Os02g44630.2	Sb01g040220.1	GRMZM2G030275_P04	Bradi1g36030.1
AC243222.t00001	LOC_Os12g28210.1	0	0	0			AC243222.t00001	LOC_Os02g44642.1	Sb01g040230.1	GRMZM2G030567_P01	Bradi1g36070.1
AC243222.t00002	0	0	0	0			AC243222.t00002	LOC_Os02g44670.1	Sb01g040240.1	GRMZM2G031893_P01	Bradi1g36070.1
AC243222.t00003	LOC_Os03g42530.1	0	0	0			AC243222.t00003	LOC_Os02g44680.1	Sb01g040250.1	GRMZM2G033526_P01	Bradi1g37810.1
AC243222.t00004	LOC_Os01g34960.1	0	0	0			AC243222.t00004	LOC_Os02g48870.1	Sb01g040260.1	GRMZM2G035256_P01	Bradi1g37830.2
AC243223.t00001	LOC_Os06g23730.1	0	0	0			AC243223.t00001	LOC_Os02g48870.1	Sb01g040270.1	GRMZM2G036720_P01	Bradi1g42330.1
AC243223.t00002	0	0	0	0			AC243223.t00002	LOC_Os02g49260.1	Sb01g040330.1	GRMZM2G037015_P01	Bradi1g42970.1
AC243223.t00003	LOC_Os07g40360.1	Sb01g022710.1	GRMZM2G411044_P01	0			AC243223.t00003	LOC_Os02g49310.1	Sb01g046340.1	GRMZM2G037023_P01	Bradi1g42980.1
AC243223.t00004	LOC_Os01g34960.1	0	0	0			AC243223.t00004	LOC_Os02g49320.1	Sb01g047540.1	GRMZM2G038487_P04	Bradi1g42980.1
AC243223.t00005	LOC_Os06g35140.1	Sb10g021360.1	GRMZM2G333083_P01	Bradi3g09160.1			AC243223.t00005	LOC_Os02g49326.1	Sb01g047540.1	GRMZM2G038893_P01	Bradi1g42980.1
AC243224.t00001	LOC_Os05g26940.1	Sb09g014000.1	GRMZM2G176519_P01	Bradi1g17810.1			AC243224.t00001	LOC_Os02g49332.1	Sb01g047540.1	GRMZM2G040638_P01	Bradi1g42980.1
AC243224.t00002	LOC_Os05g27000.1	Sb09g014230.1	GRMZM2G401830_P01	Bradi2g31080.1			AC243224.t00002	LOC_Os02g49332.2	Sb01g047540.1	GRMZM2G041394_P01	Bradi1g42980.1
AC243224.t00003	LOC_Os09g22230.1	0	AC191380.3_FGP001	0			AC243224.t00003	LOC_Os02g49340.1	Sb01g049360.1	GRMZM2G042198_P01	Bradi1g42990.1
AC243225.t00001	LOC_Os01g17240.1	Sb02g032440.1	GRMZM2G146240_P01	Bradi4g37610.1			AC243225.t00001	LOC_Os02g49350.1	Sb01g049390.1	GRMZM2G044301_P01	Bradi1g43000.2
AC243225.t00002	LOC_Os09g38420.1	Sb02g032450.1	GRMZM2G002851_P01	Bradi4g37620.1			AC243225.t00002	LOC_Os02g49360.1	Sb01g049400.1	GRMZM2G046529_P02	Bradi1g43350.1
AC243225.t00003	LOC_Os09g38440.1	Sb02g032470.1	GRMZM2G409224_P03	Bradi4g37630.1			AC243225.t00003	LOC_Os02g49440.1	Sb02g000750.1	GRMZM2G047512_P02	Bradi1g43430.1
AC243225.t00004	LOC_Os09g38440.1	Sb02g032470.1	GRMZM2G409224_P03	Bradi4g37630.2			AC243225.t00004	LOC_Os02g49450.1	Sb02g000900.1	GRMZM2G047705_P03	Bradi1g43560.1
AC243225.t00005	LOC_Os09g38450.1	Sb02g032480.1	GRMZM2G146240_P02	Bradi4g37640.1			AC243225.t00005	LOC_Os02g49450.1	Sb02g001280.1	GRMZM2G047995_P07	Bradi1g43890.1
AC243225.t00006	LOC_Os09g38500.2	Sb02g032490.1	GRMZM2G409213_P01	Bradi4g37650.1			AC243225.t00006	LOC_Os02g49450.1	Sb02g002240.1	GRMZM2G048210_P02	Bradi1g47450.1
AC243225.t00007	0	Sb03g041320.1	GRMZM2G148783_P01	Bradi4g19690.1			AC243225.t00007	LOC_Os02g49470.1	Sb02g004205.1	GRMZM2G048912_P02	Bradi1g49320.1
AC243225.t00008	LOC_Os09g38510.1	Sb02g032510.1	GRMZM2G103840_P01	Bradi4g37670.1			AC243225.t00008	LOC_Os02g56840.1	Sb02g004720.1	GRMZM2G049541_P01	Bradi1g50720.1
AC243225.t00009	LOC_Os09g38520.1	Sb02g032520.1	GRMZM2G041394_P01	Bradi4g37680.1			AC243225.t00009	LOC_Os02g57490.1	Sb02g008113.1	GRMZM2G050714_P01	Bradi1g53070.1
AC243225.t00010	LOC_Os09g38530.1	Sb02g032530.1	GRMZM2G006117_P01	Bradi4g37690.1			AC243225.t00010	LOC_Os03g02660.1	Sb02g008120.2	GRMZM2G053434_P02	Bradi1g53100.5
AC243225.t00011	LOC_Os09g38540.1	Sb02g032540.1	GRMZM2G485559_P01	Bradi4g37700.1			AC243225.t00011	LOC_Os03g02670.2	Sb02g008130.1	GRMZM2G054634_P01	Bradi1g53740.2
AC243225.t00012	LOC_Os09g38550.2	Sb10g025800.1	GRMZM2G006416_P01	Bradi4g37710.2			AC243225.t00012	LOC_Os03g02680.2	Sb02g008640.1	GRMZM2G055263_P01	Bradi1g54160.1
AC243226.t00001	LOC_Os07g47120.1	Sb02g042220.1	GRMZM2G181284_P01	Bradi1g18390.1			AC243226.t00001	LOC_Os03g13180.1	Sb02g024770.1	GRMZM2G055643_P03	Bradi1g54170.1
AC243226.t00002	LOC_Os07g47140.1	Sb02g042230.1	GRMZM2G134671_P01	Bradi1g62420.1			AC243226.t00002	LOC_Os03g13180.1	Sb02g024800.1	GRMZM2G056608_P01	Bradi1g54680.1
AC243226.t00003	LOC_Os07g47150.2	Sb02g042240.2	GRMZM2G053434_P02	Bradi1g18420.1			AC243226.t00003	LOC_Os03g15680.1	Sb02g025850.1	GRMZM2G057243_P01	Bradi1g54770.1
AC243226.t00004	LOC_Os02g03980.1	Sb06g020373.1	GRMZM2G169173_P01	Bradi1g31010.1			AC243226.t00004	LOC_Os03g15690.1	Sb02g025850.1	GRMZM2G057243_P02	Bradi1g55280.1
AC243226.t00005	LOC_Os09g31458.1	Sb07g027670.1	GRMZM2G129405_P01	Bradi4g33830.1			AC243226.t00005	LOC_Os03g15700.1	Sb02g025850.1	GRMZM2G057243_P02	Bradi1g61450.1
AC243226.t00006	LOC_Os07g47180.1	Sb02g042260.1	GRMZM2G333433_P01	Bradi1g18450.2			AC243226.t00006	LOC_Os03g15710.1	Sb02g025930.1	GRMZM2G057243_P02	Bradi1g61500.1
AC243226.t00007	LOC_Os07g47180.1	Sb01g035420.1	GRMZM2G333433_P01	Bradi1g22690.1			AC243226.t00007	LOC_Os03g15720.2	Sb02g026160.1	GRMZM2G058447_P01	Bradi1g61520.1
AC243226.t00008	LOC_Os07g47180.1	Sb02g042260.1	GRMZM5G873277_P01	Bradi1g18450.2			AC243226.t00008	LOC_Os03g15730.1	Sb02g027050.1	GRMZM2G058923_P01	Bradi1g61530.1
AC243226.t00009	LOC_Os09g27040.1	Sb02g025930.1	GRMZM2G388045_P01	Bradi4g31450.1			AC243226.t00009	LOC_Os03g15740.1	Sb02g027050.1	GRMZM2G063566_P02	Bradi1g61540.1
AC243226.t00010	LOC_Os07g47210.1	Sb02g042280.1	GRMZM2G070178_P01	Bradi1g18470.1			AC243226.t00010	LOC_Os03g24410.1	Sb02g028990.1	GRMZM2G064050_P01	Bradi1g61550.1
AC243226.t00011	LOC_Os01g23970.1	Sb02g042290.1	GRMZM2G365282_P01	Bradi1g43890.1			AC243226.t00011	LOC_Os03g25030.1	Sb02g030200.2	GRMZM2G064330_P02	Bradi1g61550.1
AC243226.t00012	LOC_Os04g54020.1	Sb02g042290.1	GRMZM2G177726_P01	Bradi1g25740.1			AC243226.t00012	LOC_Os03g25050.1	Sb02g030970.1	GRMZM2G066222_P01	Bradi1g61550.1
AC243226.t00013	LOC_Os01g27890.1	Sb10g025110.1	GRMZM2G306998_P01	Bradi2g26490.1			AC243226.t00013	LOC_Os03g25110.1	Sb02g030990.1	GRMZM2G070178_P01	Bradi1g61580.1
AC243226.t00014	LOC_Os07g47240.1	Sb09g006050.1	GRMZM2G348914_P01	Bradi2g19270.1			AC243226.t00014	LOC_Os03g25120.1	Sb02g031000.1	GRMZM2G071292_P01	Bradi1g61590.1
AC243226.t00015	LOC_Os07g47250.3	Sb02g042310.1	GRMZM2G047995_P07	Bradi1g18490.3			AC243226.t00015	LOC_Os03g25130.2	Sb02g031010.1	GRMZM2G071362_P01	Bradi1g61610.2
AC243226.t00016	LOC_Os07g47270.1	Sb02g042320.1	GRMZM2G048210_P02	Bradi2g60120.1			AC243226.t00016	LOC_Os03g25140.1	Sb02g031020.1	GRMZM2G073401_P01	Bradi1g61620.1
AC243226.t00017	LOC_Os07g10860.1	Sb02g042330.1	GRMZM2G081639_P01	Bradi1g18510.1			AC243226.t00017	LOC_Os03g25150.1	Sb02g031030.1	GRMZM2G073829_P01	Bradi1g61630.1
AC243226.t00018	0	Sb02g042330.1	GRMZM2G081639_P01	Bradi1g18510.1			AC243226.t00018	LOC_Os03g25320.1	Sb02g031040.1	GRMZM2G073829_P01	Bradi1g62420.1
AC243226.t00019	LOC_Os07g47290.1	Sb02g042340.2	GRMZM2G081682_P01	Bradi1g18550.2			AC243226.t00019	LOC_Os03g25320.1	Sb02g031040.1	GRMZM2G075372_P01	Bradi1g63700.1
AC243226.t00020	LOC_Os07g47300.1	Sb02g042350.1	GRMZM2G077632_P02	Bradi1g18570.1			AC243226.t00020	LOC_Os03g25320.1	Sb02g031060.1	GRMZM2G075499_P01	Bradi1g67270.1
AC243227.t00001	LOC_Os03g24410.1	Sb08g020680.1	GRMZM2G048912_P02	Bradi5g02180.1			AC243227.t00001	LOC_Os03g25330.1	Sb02g031070.1	GRMZM2G075618_P01	Bradi1g67280.1
AC243227.t00002	LOC_Os11g33260.1	Sb10g009420.1	GRMZM2G155087_P01	0			AC243227.t00002	LOC_Os03g25360.1	Sb02g031080.1	GRMZM2G076981_P02	Bradi1g67290.5
AC243227.t00003	LOC_Os02g57490.1	Sb04g037550.1	GRMZM2G075499_P01	Bradi3g55680.1			AC243227.t00003	LOC_Os03g25380.1	Sb02g032130.1	GRMZM2G077068_P01	Bradi1g67310.1
AC243227.t00004	LOC_Os11g07830.1	Sb05g005200.1	GRMZM2G320023_P01	Bradi4g24040.1			AC243227.t00004	LOC_Os03g25400.1	Sb02g032440.1	GRMZM2G077258_P03	Bradi1g67320.1
AC243227.t00005	0	0	0	0			AC243227.t00005	LOC_Os03g32220.1	Sb02g032450.1	GRMZM2G077632_P02	Bradi1g67330.1
AC243227.t00006	LOC_Os12g26290.4	0	GRMZM2G312997_P01	0			AC243227.t00006	LOC_Os03g36000.1	Sb02g032470.1	GRMZM2G077845_P01	Bradi1g67340.1
AC243227.t00007	LOC_Os07g42520.1	Sb06g020320.1	AC215260.3_FGP001	Bradi1g20970.1			AC243227.t00007	LOC_Os03g42520.1	Sb02g032470.1	GRMZM2G077951_P01	Bradi1g68000.2
AC243227.t00008	LOC_Os08g18220.1	Sb08g010830.1	GRMZM2G075618_P01	Bradi1g69950.1			AC243227.t00008	LOC_Os03g42530.1	Sb02g032480.1	GRMZM2G080724_P01	Bradi1g68440.1
AC243228.t00001	LOC_Os12g44370.1	Sb08g023300.1	GRMZM2G307600_P01	Bradi4g00300.1			AC243228.t00001	LOC_Os03g47760.1	Sb02g032490.1	GRMZM2G081639_P01	Bradi1g68930.1
AC243228.t00002	LOC_Os12g44380.1	Sb08g023310.1	GRMZM2G307561_P03	Bradi4g00320.1			AC243228.t00002	LOC_Os03g47770.1	Sb02g032510.1	GRMZM2G081639_P01	Bradi1g69950.1
AC243228.t00003	LOC_Os12g44380.3	Sb08g023310.1	GRMZM2G307561_P03	Bradi4g00320.1			AC243228.t00003	LOC_Os03g47780.1	Sb02g032520.1	GRMZM2G081682_P01	Bradi1g77330.1
AC243228.t00004	LOC_Os12g44380.2	Sb08g023310.1	GRMZM2G307561_P03	Bradi4g00320.1			AC243228.t00004	LOC_Os03g47790.3	Sb02g032530.1	GRMZM2G082484_P01	Bradi1g77330.1
AC243228.t00005	LOC_Os12g44320.1	Sb08g023250.1	AC195785.3_FGP004	Bradi4g00210.1			AC243228.t00005	LOC_Os03g47800.1	Sb02g032540.1	GRMZM2G083783_P01	Bradi1g78240.1
AC243228.t00006	LOC_Os08g31430.1	Sb07g006590.2	GRMZM2G077951_P01	Bradi3g18350.1			AC243228.t00006	LOC_Os03g47810.1	Sb02g033740.1	GRMZM2G085433_P01	Bradi1g78250.2
AC243228.t00007	LOC_Os12g44310.2	Sb01g047540.1	GRMZM2G057243_P02	Bradi4g00330.4			AC243228.t00007	LOC_Os03g47830.1	Sb02g036210.1	GRMZM2G089557_P01	Bradi2g01950.1
AC243228.t00008	LOC_Os12g44310.1	Sb01g047540.1	GRMZM2G057243_P02	0			AC243228.t00008	LOC_Os03g47830.1	Sb02g038000.1	GRMZM2G089767_P01	Bradi2g07300.1
AC243228.t00009	LOC_Os12g44310.1	Sb01g047540.1	GRMZM2G057243_P02	Bradi4g00330.4			AC243228.t00009	LOC_Os03g48140.1	Sb02g038020.1	GRMZM2G089806_P01	Bradi2g07630.1
AC243228.t00010	LOC_Os12g44310.2	Sb01g047540.1	GRMZM2G057243_P01	Bradi4g00330.2			AC243228.t00010	LOC_Os03g49150.1	Sb02g038030.1	GRMZM2G090435_P01	Bradi2g07630.1
AC243228.t00011	LOC_Os03g42520.1	Sb08g023230.1	GRMZM2G169535_P01	Bradi4g00340.1			AC243228.t00011	LOC_Os03g49770.1	Sb02g038040.1	GRMZM2G091245_P01	Bradi2g08010.1
AC243228.t00012	LOC_Os03g49150.1	Sb08g023220.1	GRMZM2G169451_P01	Bradi4g00370.1			AC243228.t00012	LOC_Os03g49800.1	Sb02g038050.2	GRMZM2G092104_P01	Bradi2g14420.1
AC243228.t00013	LOC_Os12g44300.1	Sb08g023210.1	GRMZM2G457523_P01	Bradi4g00370.1			AC243228.t00013	LOC_Os03g49830.1	Sb02g038070.1	GRMZM2G092160_P03	Bradi2g19150.1
AC243228.t00014	0	Sb08g023200.1	GRMZM2G123461_P01	Bradi4g00380.1			AC243228.t00014	LOC_Os03g49880.1	Sb02g038080.1	GRMZM2G092160_P03	Bradi2g19270.1
AC243228.t00015	LOC_Os12g44250.1	Sb08g023180.1	GRMZM2G423472_P01	Bradi1g54680.1			AC243228.t00015	LOC_Os03g57760.2	Sb02g038090.1	GRMZM2G092739_P01	Bradi2g19520.1
AC243228.t00016	LOC_Os12g44240.1	Sb08g023170.1	GRMZM2G423476_P01	Bradi4g00410.1			AC243228.t00016	LOC_Os03g58240.1	Sb02g038110.1	GRMZM2G093316_P02	Bradi2g24680.1
AC243229.t00001	LOC_Os03g15740.1	Sb01g040210.1	GRMZM2G151564_P01	Bradi1g67270.1			AC243229.t00001	LOC_Os03g58250.1	Sb02g038140.1	GRMZM2G094959_P05	Bradi2g24690.4
AC243229.t00002	LOC_Os03g15730.1	Sb01g040220.1	GRMZM2G151576_P01	Bradi1g67280.1			AC243229.t00002	LOC_Os03g58260.2	Sb02g038200.1	GRMZM2G095211_P01	Bradi2g24700.1
AC243229.t00003	LOC_Os03g15720.2	Sb01g040230.1	GRMZM2G151582_P01	Bradi1g67290.5			AC243229.t00003	LOC_Os03g58340.1	Sb02g038250.1	GRMZM2G096412_P01	Bradi2g24720.1
AC243229.t00004	LOC_Os12g36400.1	Sb02g001280.1	0	Bradi3g03310.1			AC243229.t00004	LOC_Os03g58400.1	Sb02g040890.1	GRMZM2G097456_P01	Bradi2g26490.1
AC243229.t00005	LOC_Os03g15710.1	Sb01g040240.1	GRMZM2G177928_P01	Bradi1g67310.1			AC243229.t00005	LOC_Os03g58420.2	Sb02g042220.1	GRMZM2G099005_P01	Bradi2g31080.1
AC243229.t00006	LOC_Os03g15700.1	Sb01g040250.1	GRMZM2G307906_P01	Bradi1g67320.1			AC243229.t00006	LOC_Os03g58470.1	Sb02g042230.1	GRMZM2G100776_P01	Bradi2g31110.1
AC243229.t00007	LOC_Os03g15690.1	Sb01g040260.1	GRMZM2G118208_P01	Bradi1g67330.1			AC243229.t00007	LOC_Os03g58490.2	Sb02g042240.2	GRMZM2G103759_P01	Bradi2g31110.2
AC243229.t00008	LOC_Os03g15680.1	Sb01g040270.1	GRMZM2G055263_P01	Bradi1g67340.1			AC243229.t00008	LOC_Os03g60080.1	Sb02g042260.1	GRMZM2G103840_P01	Bradi2g31530.1
AC243230.t00001	LOC_Os02g56840.1	Sb04g036810.1	GRMZM5G862817_P04	Bradi3g55020.1			AC243230.t00001	LOC_Os03g63570.1	Sb02g042260.1	GRMZM2G104198_P01	Bradi2g41910.3
AC243230.t00002	0	0	GRMZM2G317572_P01	0			AC243230.t00002	LOC_Os04g10610.1	Sb02g042280.1	GRMZM2G106980_P02	Bradi2g41940.1
AC243230.t00003	LOC_Os08g44270.1	Sb07g024430.1	GRMZM2G456217_P01	Bradi4g40640.1			AC243230.t00003	LOC_Os04g11810.1	Sb02g042290.1	GRMZM2G107116_P02	Bradi2g41950.1
AC243230.t00004	0	0	0	0			AC243230.t00004	LOC_Os04g11810.1	Sb02g042290.1	GRMZM2G107116_P02	Bradi2g41960.1
AC243230.t00005	LOC_Os02g13330.1	Sb10g022200.1	GRMZM2G154987_P01	Bradi1g37810.1			AC243230.t00005	LOC_Os04g15800.1	Sb02g042310.1	GRMZM2G107116_P02	Bradi2g41970.1
AC243230.t00006	LOC_Os04g43450.1	0	0	0			AC243230.t00006	LOC_Os04g21840.1	Sb02g042320.1	GRMZM2G107116_P03	Bradi2g41980.2
AC243230.t00007	LOC_Os05g10730.2	Sb10g022190.1	GRMZM2G113203_P03	Bradi1g37830.2			AC243230.t00007	LOC_Os04g24040.1	Sb02g042330.1	GRMZM2G107196_P02	Bradi2g49250.1
AC243231.t00001	0	0	0	0			AC243231.t00001	LOC_Os04g28050.2	Sb02g042330.1	GRMZM2G108589_P02	Bradi2g51510.1
AC243231.t00002	LOC_Os11g40610.5	Sb05g025110.1	GRMZM5G877647_P01	Bradi4g13230.1			AC243231.t00002	LOC_Os04g35190.1	Sb02g042340.2	GRMZM2G111022_P01	Bradi2g54640.1
AC243231.t00003	LOC_Os11g40600.1	Sb05g025080.1	GRMZM2G058447_P01	Bradi4g13260.1			AC243231.t00003	LOC_Os04g35210.1	Sb02g042350.1	GRMZM2G111022_P01	Bradi2g56600.1
AC243231.t00004	LOC_Os11g40590.3	Sb05g025070.1	GRMZM2G358827_P01	Bradi4g13280.1			AC243231.t00004	LOC_Os04g35240.1	Sb02g043230.1	GRMZM2G111022_P01	Bradi2g60120.1
AC243231.t00005	LOC_Os11g41120.1	Sb05g025120.1	GRMZM2G123996_P01	Bradi4g12950.1			AC243231.t00005	LOC_Os04g35260.1	Sb02g043260.2	GRMZM2G111172_P01	Bradi2g60690.1
AC243232.t00001	0	Sb01g049400.1	0	0			AC243232.t00001	LOC_Os04g35260.1	Sb03g007380.2	GRMZM2G111872_P01	Bradi2g61060.1
AC243232.t00002	0	0	0	0			AC243232.t00002	LOC_Os04g35280.1	Sb03g012270.1	GRMZM2G113135_P01	Bradi2g61500.2
AC243232.t00003	LOC_Os03g02660.1	Sb01g049390.1	GRMZM2G030567_P01	0			AC243232.t00003	LOC_Os04g35290.1	Sb03g022830.1	GRMZM2G113203_P03	Bradi3g00950.1
AC243232.t00004	LOC_Os03g02670.2	Sb01g049360.1	GRMZM2G143187_P01	Bradi1g77330.1			AC243232.t00004	LOC_Os04g35300.1	Sb03g026040.1	GRMZM2G113613_P01	Bradi3g03310.1
AC243232.t00005	LOC_Os03g02680.2	Sb04g001920.1	GRMZM2G143213_P02	Bradi1g77330.1			AC243232.t00005	LOC_Os04g35380.1	Sb03g026050.1	GRMZM2G113613_P01	Bradi3g04430.1
AC243232.t00006	0	0	0	0			AC243232.t00006	LOC_Os04g36910.1	Sb03g026070.1	GRMZM2G113655_P01	Bradi3g06240.1
AC243232.t00007	LOC_Os02g29960.1	Sb02g025850.1	GRMZM2G125482_P01	Bradi4g31380.1			AC243232.t00007	LOC_Os04g37790.2	Sb03g026070.1	GRMZM2G114570_P04	Bradi3g06580.1
AC243232.t00008	LOC_Os04g11810.1	Sb09g005680.1	GRMZM2G073829_P01	Bradi5g01770.1			AC243232.t00008	LOC_Os04g38240.1	Sb03g026080.1	GRMZM2G116335_P01	Bradi3g07050.1
AC243232.t00009	LOC_Os02g29960.1	Sb02g025850.1	GRMZM2G140915_P01	Bradi4g31380.1			AC243232.t00009	LOC_Os04g38290.1	Sb03g026090.1	GRMZM2G116335_P01	Bradi3g07090.2
AC243232.t00010	LOC_Os09g08990.1	Sb01g034710.1	GRMZM2G140915_P01	Bradi4g31380.1			AC243232.t00010	LOC_Os04g40380.1	Sb03g026110.1	GRMZM2G116840_P04	Bradi3g09160.1
AC243232.t00011	LOC_Os02g29960.1	Sb02g025850.1	GRMZM2G125482_P01	Bradi4g31380.1			AC243232.t00011	LOC_Os04g43450.1	Sb03g028750.1	GRMZM2G117365_P01	Bradi3g10370.1
AC243232.t00012	LOC_Os04g11810.1	Sb09g005680.1	GRMZM2G073829_P01	Bradi5g01770.1			AC243232.t00012	LOC_Os04g43690.2	Sb03g037190.1	GRMZM2G117365_P01	Bradi3g10370.1
AC243233.t00001	LOC_Os08g13920.1	Sb06g015880.1	GRMZM2G119783_P01	Bradi3g18590.1			AC243233.t00001	LOC_Os04g43730.1	Sb03g041320.1	GRMZM2G117365_P01	Bradi3g10380.1
AC243233.t00002	LOC_Os11g31020.1	0	0	0			AC243233.t00002	LOC_Os04g43730.1	Sb03g046100.1	GRMZM2G117633_P03	Bradi3g10380.1
AC243233.t00003	LOC_Os10g41780.3	Sb03g046660.1	GRMZM2G038487_P04	Bradi2g61500.2			AC243233.t00003	LOC_Os04g43730.1	Sb03g046660.1	GRMZM2G117746_P01	Bradi3g10380.1
AC243233.t00004	LOC_Os02g19620.1	0	0	0			AC243233.t00004	LOC_Os04g43740.1	Sb04g001756.1	GRMZM2G117754_P02	Bradi3g12770.3
AC243233.t00005	LOC_Os01g03710.1	Sb03g007380.2	GRMZM2G121066_P01	Bradi2g01950.1			AC243233.t00005	LOC_Os04g43750.2	Sb04g001920.1	GRMZM2G117779_P01	Bradi3g15480.1
AC243233.t00006	LOC_Os04g51520.1	Sb06g015930.1	GRMZM2G063566_P02	Bradi3g18590.1			AC243233.t00006	LOC_Os04g43760.1	Sb04g004030.1	GRMZM2G118208_P01	Bradi3g18350.1
AC243233.t00007	LOC_Os02g48870.1	Sb04g029390.1	GRMZM2G124684_P01	Bradi3g53620.1			AC243233.t00007	LOC_Os04g46810.1	Sb04g005760.1	GRMZM2G118628_P01	Bradi3g18590.1
AC243233.t00008	LOC_Os12g36270.1	Sb08g018990.1	GRMZM2G399325_P01	Bradi4g05280.1			AC243233.t00008	LOC_Os04g46820.1	Sb04g006090.1	GRMZM2G119067_P01	Bradi3g18590.1
AC243234.t00001	LOC_Os01g40050.2	Sb03g026040.1	GRMZM2G036720_P01	Bradi2g41910.3			AC243234.t00001	LOC_Os04g51520.1	Sb04g006100.1	GRMZM2G119265_P01	Bradi3g20440.1
AC243234.t00002	LOC_Os01g40070.1	Sb03g026050.1	GRMZM2G037015_P01	Bradi2g41940.1			AC243234.t00002	LOC_Os04g53994.1	Sb04g006590.1	GRMZM2G119270_P01	Bradi3g22070.1
AC243234.t00003	LOC_Os02g44500.1	Sb04g032520.1	GRMZM2G135893_P01	Bradi3g51010.1			AC243234.t00003	LOC_Os04g53994.1	Sb04g008542.1	GRMZM2G119783_P01	Bradi3g22070.1
AC243234.t00004	LOC_Os01g40094.1	Sb03g026070.1	GRMZM2G134628_P01	Bradi2g41950.1			AC243234.t00004	LOC_Os04g53998.1	Sb04g011040.1	GRMZM2G120574_P01	Bradi3g22350.2
AC243234.t00005	LOC_Os06g09850.3	Sb01g005550.1	GRMZM2G120596_P01	Bradi1g06110.1			AC243234.t00005	LOC_Os04g54002.1	Sb04g011040.1	GRMZM2G120596_P01	Bradi3g30650.1
AC243234.t00006	0	0	0	0			AC243234.t00006	LOC_Os04g54002.1	Sb04g011040.1	GRMZM2G120596_P02	Bradi3g30660.1
AC243234.t00007	LOC_Os01g40110.1	Sb03g026080.1	GRMZM2G170632_P02	Bradi2g41960.1			AC243234.t00007	LOC_Os04g54020.1	Sb04g012900.1	GRMZM2G121066_P01	Bradi3g30670.3
AC243234.t00008	LOC_Os01g40190.1	Sb03g026090.1	GRMZM2G170628_P01	Bradi2g41970.1			AC243234.t00008	LOC_Os04g54070.1	Sb04g018940.1	GRMZM2G121468_P02	Bradi3g30680.1
AC243235.t00001	LOC_Os04g28050.2	0	0	0			AC243235.t00001	LOC_Os04g55650.1	Sb04g018940.1	GRMZM2G123461_P01	Bradi3g30690.1
AC243235.t00002	0	0	0	Bradi4g42180.1			AC243235.t00002	LOC_Os04g57440.1	Sb04g019000.1	GRMZM2G123996_P01	Bradi3g30710.2
AC243235.t00003	LOC_Os12g26020.1	Sb04g038210.1	GRMZM2G179358_P01	Bradi2g07300.1			AC243235.t00003	LOC_Os05g08310.1	Sb04g020630.1	GRMZM2G124026_P01	Bradi3g30730.1
AC243235.t00004	LOC_Os01g71800.1	Sb01g028270.1	GRMZM2G035256_P01	Bradi2g19520.1			AC243235.t00004	LOC_Os05g10420.1	Sb04g020640.1	GRMZM2G124684_P01	Bradi3g30740.3
AC243236.t00001	LOC_Os05g23140.1	Sb07g028370.1	GRMZM2G080724_P01	Bradi1g68440.1			AC243236.t00001	LOC_Os05g10420.1	Sb04g020660.1	GRMZM2G124684_P01	Bradi3g33920.1
AC243236.t00002	LOC_Os08g26820.1	Sb07g019160.1	GRMZM2G174449_P01	Bradi3g22070.1			AC243236.t00002	LOC_Os05g10730.2	Sb04g020670.1	GRMZM2G125482_P01	Bradi3g33930.1
AC243236.t00003	LOC_Os08g26820.1	Sb07g019160.1	GRMZM2G174449_P01	Bradi3g22070.1			AC243236.t00003	LOC_Os05g23140.1	Sb04g020680.1	GRMZM2G125482_P01	Bradi3g33950.1
AC243236.t00004	0	Sb08g023260.1	GRMZM2G151236_P06	0			AC243236.t00004	LOC_Os05g23670.1	Sb04g020690.1	GRMZM2G125668_P01	Bradi3g35070.1
AC243236.t00005	0	Sb07g015690.1	0	0			AC243236.t00005	LOC_Os05g23670.1	Sb04g022920.1	GRMZM2G125867_P02	Bradi3g35400.2
AC243236.t00006	LOC_Os04g36910.1	Sb07g025780.1	GRMZM2G026737_P01	Bradi3g54590.1			AC243236.t00006	LOC_Os05g26940.1	Sb04g024620.1	GRMZM2G127080_P02	Bradi3g36100.1
AC243236.t00007	LOC_Os08g25700.1	Sb07g012110.1	GRMZM2G091245_P01	Bradi3g22350.2			AC243236.t00007	LOC_Os05g27000.1	Sb04g029280.1	GRMZM2G127548_P01	Bradi3g38330.1
AC243236.t00008	0	Sb08g021650.1	GRMZM2G381822_P01	0			AC243236.t00008	LOC_Os05g34820.1	Sb04g029290.1	GRMZM2G127548_P01	Bradi3g43420.1
AC243236.t00009	LOC_Os02g09270.1	Sb04g005760.1	GRMZM2G012865_P01	Bradi3g06240.1			AC243236.t00009	LOC_Os05g35240.1	Sb04g029290.1	GRMZM2G127548_P01	Bradi3g43420.1
AC243237.t00001	LOC_Os09g25090.1	Sb02g024770.1	GRMZM2G129018_P02	Bradi4g30380.1			AC243237.t00001	LOC_Os05g35266.1	Sb04g029290.1	GRMZM2G129018_P02	Bradi3g43450.1
AC243237.t00002	LOC_Os01g72420.1	Sb03g046100.1	GRMZM2G071292_P01	Bradi2g61060.1			AC243237.t00002	LOC_Os05g35274.5	Sb04g029300.1	GRMZM2G129405_P01	Bradi3g43460.1
AC243237.t00003	0	0	0	0			AC243237.t00003	LOC_Os05g35360.1	Sb04g029360.1	GRMZM2G130064_P01	Bradi3g43460.1
AC243237.t00004	LOC_Os04g10610.1	0	0	0			AC243237.t00004	LOC_Os05g40110.1	Sb04g029390.1	GRMZM2G132929_P01	Bradi3g43460.1
AC243237.t00005	LOC_Os09g27500.1	Sb02g026160.1	GRMZM2G154752_P01	Bradi4g31710.1			AC243237.t00005	LOC_Os05g51500.1	Sb04g029400.1	GRMZM2G134628_P01	Bradi3g44060.1
AC243237.t00006	LOC_Os09g25190.1	Sb02g024800.1	GRMZM2G125867_P02	Bradi4g30410.1			AC243237.t00006	LOC_Os06g02480.1	Sb04g029410.1	GRMZM2G134628_P01	Bradi3g44070.1
AC243237.t00007	LOC_Os02g14090.1	Sb04g008542.1	GRMZM2G429540_P01	Bradi3g35070.1			AC243237.t00007	LOC_Os06g06740.1	Sb04g029420.1	GRMZM2G134671_P01	Bradi3g44100.1
AC243238.t00001	LOC_Os07g40250.1	Sb02g038140.1	GRMZM2G076981_P02	Bradi1g22860.1			AC243238.t00001	LOC_Os06g06760.3	Sb04g029420.1	GRMZM2G135782_P02	Bradi3g44130.1
AC243238.t00002	LOC_Os07g40240.1	Sb02g038110.1	GRMZM2G077845_P01	0			AC243238.t00002	LOC_Os06g08350.1	Sb04g029430.1	GRMZM2G135782_P02	Bradi3g44140.1
AC243238.t00003	LOC_Os07g40150.1	Sb02g038090.1	GRMZM2G181219_P01	Bradi1g22870.1			AC243238.t00003	LOC_Os06g09850.3	Sb04g029440.1	GRMZM2G135893_P01	Bradi3g45980.1
AC243238.t00004	LOC_Os07g40120.1	Sb02g038080.1	GRMZM2G092739_P01	Bradi1g22890.1			AC243238.t00004	LOC_Os06g13120.1	Sb04g029450.1	GRMZM2G136139_P01	Bradi3g49230.1
AC243238.t00005	LOC_Os02g09720.1	Sb04g006090.1	GRMZM5G843192_P01	0			AC243238.t00005	LOC_Os06g17000.1	Sb04g029460.1	GRMZM2G139213_P01	Bradi3g49250.2
AC243238.t00006	LOC_Os02g09720.1	Sb04g006100.1	GRMZM2G146034_P01	Bradi3g06580.1			AC243238.t00006	LOC_Os06g17000.1	Sb04g029470.1	GRMZM2G139900_P02	Bradi3g51010.1
AC243238.t00007	LOC_Os03g32220.1	Sb02g038070.1	AC185108.3_FGP011	Bradi2g49250.1			AC243238.t00007	LOC_Os06g17390.1	Sb04g029480.1	GRMZM2G140915_P01	Bradi3g51350.1
AC243238.t00008	LOC_Os02g03890.1	Sb02g038050.2	GRMZM2G167932_P02	Bradi3g12770.3			AC243238.t00008	LOC_Os06g19680.1	Sb04g032390.1	GRMZM2G140915_P01	Bradi3g51360.1
AC243238.t00009	LOC_Os07g40020.1	Sb02g038040.1	GRMZM2G097456_P01	Bradi1g22910.1			AC243238.t00009	LOC_Os06g19690.1	Sb04g032400.1	GRMZM2G142037_P01	Bradi3g51380.1
AC243238.t00010	LOC_Os01g64910.1	Sb02g036210.1	GRMZM2G096412_P01	Bradi2g19150.1			AC243238.t00010	LOC_Os06g19730.1	Sb04g032420.1	GRMZM2G142249_P01	Bradi3g51400.1
AC243238.t00011	LOC_Os07g40000.1	Sb02g038030.1	GRMZM2G177110_P01	Bradi1g22920.1			AC243238.t00011	LOC_Os06g19730.1	Sb04g032430.1	GRMZM2G143008_P01	Bradi3g51400.1
AC243238.t00012	LOC_Os07g39980.1	Sb02g038020.1	GRMZM5G824534_P02	Bradi1g22930.1			AC243238.t00012	LOC_Os06g19730.1	Sb04g032440.1	GRMZM2G143187_P01	Bradi3g51400.1
AC243238.t00013	LOC_Os03g36000.1	Sb01g040330.1	GRMZM2G360439_P01	Bradi4g23630.1			AC243238.t00013	LOC_Os06g19730.1	Sb04g032440.1	GRMZM2G143213_P02	Bradi3g53620.1
AC243238.t00014	LOC_Os07g39960.1	Sb02g038000.1	GRMZM2G089557_P01	Bradi1g22940.1			AC243238.t00014	LOC_Os06g19800.1	Sb04g032520.1	GRMZM2G144818_P01	Bradi3g53620.1
AC243239.t00001	0	0	0	0			AC243239.t00001	LOC_Os06g22520.1	Sb04g036810.1	GRMZM2G145045_P01	Bradi3g54590.1
AC243239.t00002	0	0	0	0			AC243239.t00002	LOC_Os06g23730.1	Sb04g037550.1	GRMZM2G145045_P01	Bradi3g55020.1
AC243239.t00003	LOC_Os05g23670.1	Sb09g008870.1	GRMZM2G108589_P02	Bradi2g31110.2			AC243239.t00003	LOC_Os06g26150.1	Sb04g038210.1	GRMZM2G145109_P01	Bradi3g55680.1
AC243239.t00004	LOC_Os05g23670.1	Sb02g000900.1	GRMZM2G044301_P01	Bradi2g31110.1			AC243239.t00004	LOC_Os06g35140.1	Sb05g001130.1	GRMZM2G145895_P01	Bradi3g56350.1
AC243240.t00001	0	0	0	0			AC243240.t00001	LOC_Os06g40960.1	Sb05g001460.1	GRMZM2G145944_P01	Bradi3g56370.1
AC243240.t00002	LOC_Os09g07510.2	Sb10g001960.2	GRMZM2G164352_P05	Bradi4g08720.1			AC243240.t00002	LOC_Os06g41020.1	Sb05g001890.1	GRMZM2G146034_P01	Bradi3g56370.1
AC243240.t00003	LOC_Os06g19800.1	Sb09g025520.1	GRMZM2G106980_P02	Bradi1g42970.1			AC243240.t00003	LOC_Os06g41030.1	Sb05g005200.1	GRMZM2G146240_P01	Bradi3g56370.1
AC243240.t00004	LOC_Os06g19730.1	Sb10g011095.1	GRMZM2G107116_P02	Bradi1g42980.1			AC243240.t00004	LOC_Os06g42890.1	Sb05g005700.1	GRMZM2G146240_P02	Bradi3g56380.1
AC243240.t00005	LOC_Os06g19730.1	0	GRMZM2G107116_P02	Bradi1g42980.1			AC243240.t00005	LOC_Os06g47300.1	Sb05g005710.1	GRMZM2G147123_P01	Bradi3g56410.1
AC243240.t00006	LOC_Os06g19730.1	0	GRMZM2G107116_P02	Bradi1g42980.1			AC243240.t00006	LOC_Os06g47310.1	Sb05g007380.1	GRMZM2G147332_P01	Bradi3g56440.1
AC243240.t00007	LOC_Os06g19730.1	0	GRMZM2G107116_P03	Bradi1g42980.1			AC243240.t00007	LOC_Os06g47320.1	Sb05g008500.1	GRMZM2G147422_P01	Bradi3g56440.1
AC243240.t00008	0	Sb10g011090.1	0	Bradi1g42980.1			AC243240.t00008	LOC_Os06g47330.1	Sb05g008510.1	GRMZM2G147454_P01	Bradi3g56450.4
AC243240.t00009	0	0	0	0			AC243240.t00009	LOC_Os06g47330.1	Sb05g008512.1	GRMZM2G147459_P01	Bradi3g56460.1
AC243240.t00010	LOC_Os09g38200.1	0	GRMZM2G336137_P01	0			AC243240.t00010	LOC_Os06g47340.1	Sb05g016840.1	GRMZM2G148188_P01	Bradi3g56480.1
AC243240.t00011	LOC_Os06g19690.1	Sb02g004205.1	GRMZM2G046529_P02	Bradi1g42990.1			AC243240.t00011	LOC_Os06g47880.1	Sb05g022610.1	GRMZM2G148783_P01	Bradi3g56490.3
AC243240.t00012	LOC_Os03g63570.1	Sb05g022610.1	0	0			AC243240.t00012	LOC_Os06g48610.1	Sb05g023230.1	GRMZM2G149619_P01	Bradi3g56710.1
AC243240.t00013	LOC_Os06g47880.1	Sb02g033740.1	GRMZM2G139213_P01	Bradi4g31620.1			AC243240.t00013	LOC_Os06g50110.1	Sb05g024000.1	GRMZM2G150276_P01	Bradi3g56710.1
AC243240.t00014	LOC_Os11g41390.1	0	0	0			AC243240.t00014	LOC_Os07g03820.1	Sb05g024010.1	GRMZM2G150674_P01	Bradi3g60980.1
AC243240.t00015	LOC_Os06g19680.1	Sb10g011070.1	GRMZM2G055643_P03	Bradi1g43000.2			AC243240.t00015	LOC_Os07g03830.1	Sb05g025070.1	GRMZM2G151169_P01	Bradi4g00210.1
AC243240.t00016	LOC_Os06g17000.1	Sb09g025520.1	GRMZM5G800586_P01	Bradi1g49320.1			AC243240.t00016	LOC_Os07g08460.1	Sb05g025080.1	GRMZM2G151236_P06	Bradi4g00300.1
AC243240.t00017	LOC_Os06g17000.1	Sb09g025520.1	GRMZM5G800586_P01	Bradi1g50720.1			AC243240.t00017	LOC_Os07g08660.1	Sb05g025110.1	GRMZM2G151564_P01	Bradi4g00320.1
AC243241.t00001	0	0	0	0			AC243241.t00001	LOC_Os07g10860.1	Sb05g025120.1	GRMZM2G151576_P01	Bradi4g00320.1
AC243241.t00002	LOC_Os04g38240.1	0	0	0			AC243241.t00002	LOC_Os07g12060.1	Sb05g027300.1	GRMZM2G151582_P01	Bradi4g00320.1
AC243241.t00003	LOC_Os10g37170.1	Sb06g016240.1	GRMZM2G092104_P01	Bradi2g31530.1			AC243241.t00003	LOC_Os07g12650.1	Sb06g003210.1	GRMZM2G153292_P08	Bradi4g00330.2
AC243241.t00004	LOC_Os12g09530.1	Sb01g046340.1	GRMZM2G360439_P01	Bradi3g36100.1			AC243241.t00004	LOC_Os07g12650.3	Sb06g013920.1	GRMZM2G154752_P01	Bradi4g00330.4
AC243241.t00005	LOC_Os10g42090.2	Sb01g028480.1	GRMZM2G144818_P01	Bradi3g33920.1			AC243241.t00005	LOC_Os07g13890.1	Sb06g013940.1	GRMZM2G154987_P01	Bradi4g00330.4
AC243241.t00006	LOC_Os10g42100.1	Sb01g028470.1	GRMZM2G033526_P01	Bradi3g33930.1			AC243241.t00006	LOC_Os07g15670.3	Sb06g015880.1	GRMZM2G155087_P01	Bradi4g00340.1
AC243241.t00007	LOC_Os10g42110.1	Sb01g028460.1	GRMZM2G054634_P01	Bradi3g33950.1			AC243241.t00007	LOC_Os07g15680.1	Sb06g015930.1	GRMZM2G155593_P01	Bradi4g00370.1
AC243242.t00001	0	0	0	0			AC243242.t00001	LOC_Os07g15880.1	Sb06g016240.1	GRMZM2G155626_P01	Bradi4g00370.1
AC243242.t00002	LOC_Os02g30650.1	Sb04g020690.1	GRMZM2G111872_P01	Bradi3g44140.1			AC243242.t00002	LOC_Os07g39960.1	Sb06g016930.1	GRMZM2G156490_P01	Bradi4g00380.1
AC243242.t00003	0	0	0	0			AC243242.t00003	LOC_Os07g39980.1	Sb06g016947.1	GRMZM2G157147_P01	Bradi4g00410.1
AC243242.t00004	LOC_Os02g30630.2	Sb04g020680.1	GRMZM2G143008_P01	Bradi3g44130.1			AC243242.t00004	LOC_Os07g40000.1	Sb06g016950.1	GRMZM2G159675_P01	Bradi4g02230.1
AC243242.t00005	0	Sb06g013920.1	GRMZM2G159675_P01	0			AC243242.t00005	LOC_Os07g40020.1	Sb06g016960.1	GRMZM2G160853_P01	Bradi4g05230.1
AC243242.t00006	LOC_Os02g30620.3	Sb04g020670.1	GRMZM2G147123_P01	Bradi5g08200.1			AC243242.t00006	LOC_Os07g40120.1	Sb06g016970.1	GRMZM2G163912_P01	Bradi4g05230.1
AC243242.t00007	LOC_Os02g30610.2	Sb04g020660.1	GRMZM2G119270_P01	Bradi3g44100.1			AC243242.t00007	LOC_Os07g40150.1	Sb06g016980.1	GRMZM2G164082_P01	Bradi4g05280.1
AC243242.t00008	LOC_Os05g10420.1	Sb05g024000.1	0	Bradi5g22690.1			AC243242.t00008	LOC_Os07g40240.1	Sb06g016990.1	GRMZM2G164352_P05	Bradi4g06730.1
AC243242.t00009	LOC_Os06g50110.1	Sb08g001600.1	GRMZM2G099005_P01	0			AC243242.t00009	LOC_Os07g40250.1	Sb06g017000.1	GRMZM2G166603_P01	Bradi4g08710.1
AC243242.t00010	LOC_Os05g10420.1	Sb05g024010.1	0	Bradi5g22690.1			AC243242.t00010	LOC_Os07g40320.1	Sb06g017010.1	GRMZM2G166903_P01	Bradi4g08720.1
AC243242.t00011	LOC_Os02g30470.1	Sb04g020640.1	GRMZM2G124026_P01	Bradi3g44070.1			AC243242.t00011	LOC_Os07g40360.1	Sb06g017220.1	GRMZM2G167932_P02	Bradi4g08950.1
AC243242.t00012	LOC_Os02g30460.1	Sb04g020630.1	GRMZM2G125668_P01	Bradi3g44060.1			AC243242.t00012	LOC_Os07g42520.1	Sb06g017260.1	GRMZM2G168073_P01	Bradi4g12950.1
AC243243.t00001	LOC_Os04g38290.1	Sb01g028180.1	GRMZM2G104198_P01	Bradi4g21310.1			AC243243.t00001	LOC_Os07g44540.1	Sb06g018430.1	GRMZM2G169173_P01	Bradi4g13230.1
AC243243.t00002	0	0	0	0			AC243243.t00002	LOC_Os07g44710.1	Sb06g020320.1	GRMZM2G169451_P01	Bradi4g13260.1
AC243243.t00003	0	0	0	0			AC243243.t00003	LOC_Os07g45970.1	Sb06g020373.1	GRMZM2G169535_P01	Bradi4g13280.1
AC243243.t00004	LOC_Os11g06780.1	Sb02g000750.1	GRMZM2G120574_P01	Bradi4g24590.1			AC243243.t00004	LOC_Os07g47120.1	Sb06g022670.1	GRMZM2G170628_P01	Bradi4g19690.1
AC243243.t00005	LOC_Os05g34820.1	Sb04g024620.1	GRMZM2G020409_P01	Bradi5g18230.1			AC243243.t00005	LOC_Os07g47140.1	Sb06g022670.1	GRMZM2G170632_P02	Bradi4g21310.1
AC243244.t00001	LOC_Os11g11490.1	Sb05g008500.1	GRMZM2G118628_P01	Bradi4g22030.1			AC243244.t00001	LOC_Os07g47150.2	Sb06g022680.1	GRMZM2G172451_P01	Bradi4g22030.1
AC243244.t00002	LOC_Os11g11430.2	Sb05g008510.1	GRMZM2G148188_P01	Bradi4g22050.1			AC243244.t00002	LOC_Os07g47180.1	Sb06g022690.1	GRMZM2G174449_P01	Bradi4g22050.1
AC243244.t00003	LOC_Os11g11410.1	Sb05g008512.1	GRMZM5G825707_P02	Bradi4g22060.1			AC243244.t00003	LOC_Os07g47180.1	Sb06g022700.1	GRMZM2G174449_P01	Bradi4g22060.1
AC243245.t00001	LOC_Os05g08310.1	0	GRMZM2G393157_P01	0			AC243245.t00001	LOC_Os07g47180.1	Sb06g022700.1	GRMZM2G175258_P01	Bradi4g23500.1
AC243245.t00002	LOC_Os05g40110.1	Sb04g012900.1	AC190767.2_FGP001	Bradi5g04800.1			AC243245.t00002	LOC_Os07g47210.1	Sb06g022700.1	GRMZM2G175258_P01	Bradi4g23550.1
AC243245.t00003	0	Sb03g022830.1	0	0			AC243245.t00003	LOC_Os07g47240.1	Sb06g022720.1	GRMZM2G175676_P04	Bradi4g23630.1
AC243245.t00004	0	0	GRMZM2G018024_P01	0			AC243245.t00004	LOC_Os07g47250.3	Sb06g022730.1	GRMZM2G175860_P02	Bradi4g24040.1
AC243245.t00005	0	Sb10g005340.1	GRMZM2G127080_P02	0			AC243245.t00005	LOC_Os07g47270.1	Sb06g022740.1	GRMZM2G176443_P02	Bradi4g24590.1
AC243246.t00001	LOC_Os11g06610.1	0	GRMZM2G092160_P03	0			AC243246.t00001	LOC_Os07g47290.1	Sb06g024780.1	GRMZM2G176519_P01	Bradi4g30380.1
AC243246.t00002	LOC_Os11g06460.1	Sb02g038250.1	GRMZM2G100776_P01	Bradi1g63700.1			AC243246.t00002	LOC_Os07g47300.1	Sb06g024790.1	GRMZM2G177110_P01	Bradi4g30410.1
AC243246.t00003	0	0	0	0			AC243246.t00003	LOC_Os07g48490.2	Sb06g029725.1	GRMZM2G177596_P01	Bradi4g31380.1
AC243246.t00004	LOC_Os11g06610.1	0	GRMZM2G092160_P03	0			AC243246.t00004	LOC_Os07g48500.1	Sb06g029725.1	GRMZM2G177726_P01	Bradi4g31380.1
AC243246.t00005	0	0	0	0			AC243246.t00005	LOC_Os07g49520.1	Sb06g029725.1	GRMZM2G177928_P01	Bradi4g31380.1
AC243246.t00006	0	0	0	0			AC243246.t00006	LOC_Os08g08140.1	Sb06g029725.1	GRMZM2G179358_P01	Bradi4g31380.1
AC243246.t00007	0	0	0	0			AC243246.t00007	LOC_Os08g13920.1	Sb06g029740.1	GRMZM2G181219_P01	Bradi4g31450.1
AC243246.t00008	LOC_Os08g30740.1	Sb07g019510.1	GRMZM2G142249_P01	Bradi3g35400.2			AC243246.t00008	LOC_Os08g18220.1	Sb07g001530.1	GRMZM2G181284_P01	Bradi4g31620.1
AC243247.t00001	LOC_Os07g12650.3	Sb09g020940.1	GRMZM2G139900_P02	Bradi1g53740.2			AC243247.t00001	LOC_Os08g21840.1	Sb07g006590.2	GRMZM2G305254_P06	Bradi4g31710.1
AC243247.t00002	LOC_Os07g12650.1	Sb09g020940.1	GRMZM2G132929_P01	Bradi1g06520.3			AC243247.t00002	LOC_Os08g25700.1	Sb07g012110.1	GRMZM2G306998_P01	Bradi4g33830.1
AC243247.t00003	0	0	0	0			AC243247.t00003	LOC_Os08g26820.1	Sb07g015690.1	GRMZM2G307561_P03	Bradi4g36140.1
AC243247.t00004	LOC_Os03g13180.1	Sb09g021000.1	GRMZM2G117365_P01	Bradi1g68930.1			AC243247.t00004	LOC_Os08g26820.1	Sb07g019160.1	GRMZM2G307561_P03	Bradi4g36240.1
AC243247.t00005	LOC_Os03g13180.1	Sb09g021040.1	GRMZM2G117365_P01	Bradi4g05230.1			AC243247.t00005	LOC_Os08g30740.1	Sb07g019160.1	GRMZM2G307561_P03	Bradi4g36250.1
AC243247.t00006	LOC_Os10g01750.1	Sb09g020970.1	GRMZM2G117365_P01	Bradi4g05230.1			AC243247.t00006	LOC_Os08g31430.1	Sb07g019510.1	GRMZM2G307600_P01	Bradi4g36280.1
AC243247.t00007	LOC_Os11g14220.1	Sb01g009560.1	GRMZM2G153292_P08	Bradi1g10150.1			AC243247.t00007	LOC_Os08g39160.1	Sb07g023250.1	GRMZM2G307906_P01	Bradi4g36290.1
AC243247.t00008	LOC_Os05g35240.1	Sb09g021060.1	GRMZM2G071362_P01	Bradi2g24720.1			AC243247.t00008	LOC_Os08g40050.1	Sb07g024430.1	GRMZM2G309970_P01	Bradi4g36310.1
AC243247.t00009	LOC_Os05g35266.1	Sb09g021080.1	GRMZM2G119265_P01	Bradi2g24700.1			AC243247.t00009	LOC_Os08g41270.1	Sb07g025780.1	GRMZM2G310410_P01	Bradi4g36330.2
AC243247.t00010	LOC_Os05g35274.5	Sb09g021090.1	GRMZM2G175676_P04	Bradi2g24690.4			AC243247.t00010	LOC_Os08g43470.1	Sb07g026650.1	GRMZM2G310410_P01	Bradi4g36360.1
AC243247.t00011	LOC_Os06g13120.1	Sb09g021100.1	GRMZM2G056608_P01	Bradi1g25900.1			AC243247.t00011	LOC_Os08g44270.1	Sb07g026650.1	GRMZM2G312944_P01	Bradi4g36800.1
AC243247.t00012	LOC_Os01g65480.1	Sb09g021110.1	GRMZM2G175860_P02	Bradi2g24680.1			AC243247.t00012	LOC_Os09g07510.2	Sb07g027670.1	GRMZM2G312997_P01	Bradi4g37610.1
AC243247.t00013	LOC_Os02g35200.1	Sb04g022920.1	GRMZM2G121468_P02	Bradi3g45980.1			AC243247.t00013	LOC_Os09g08190.1	Sb07g028370.1	GRMZM2G317451_P01	Bradi4g37620.1
AC243247.t00014	LOC_Os05g35360.1	Sb09g021140.1	AC234152.1_FGP005	Bradi2g56600.1			AC243247.t00014	LOC_Os09g08990.1	Sb08g001600.1	GRMZM2G317572_P01	Bradi4g37630.1
AC243248.t00001	LOC_Os06g47300.1	Sb10g027920.1	GRMZM2G064330_P02	Bradi1g33290.1			AC243248.t00001	LOC_Os09g22230.1	Sb08g004250.1	GRMZM2G320023_P01	Bradi4g37630.2
AC243248.t00002	LOC_Os07g48500.1	Sb02g043260.2	GRMZM2G410766_P01	Bradi1g17450.1			AC243248.t00002	LOC_Os09g25090.1	Sb08g010830.1	GRMZM2G328258_P01	Bradi4g37640.1
AC243248.t00003	0	0	AC198324.3_FGP003	0			AC243248.t00003	LOC_Os09g25190.1	Sb08g016090.1	GRMZM2G330424_P01	Bradi4g37650.1
AC243248.t00004	LOC_Os07g48490.2	Sb02g043230.1	GRMZM2G469380_P02	Bradi1g17460.1			AC243248.t00004	LOC_Os09g27040.1	Sb08g018990.1	GRMZM2G330751_P01	Bradi4g37670.1
AC243248.t00005	LOC_Os06g47310.1	Sb10g027930.1	GRMZM2G026881_P01	Bradi1g33300.1			AC243248.t00005	LOC_Os09g27500.1	Sb08g019850.1	GRMZM2G333083_P01	Bradi4g37680.1
AC243248.t00006	0	0	0	0			AC243248.t00006	LOC_Os09g28890.2	Sb08g020630.1	GRMZM2G333433_P01	Bradi4g37690.1
AC243248.t00007	LOC_Os06g47320.1	Sb04g004030.1	GRMZM2G009871_P02	Bradi3g04430.1			AC243248.t00007	LOC_Os09g31140.1	Sb08g020630.1	GRMZM2G333433_P01	Bradi4g37700.1
AC243248.t00008	LOC_Os06g47330.1	Sb10g027960.1	GRMZM2G113613_P01	Bradi1g33310.1			AC243248.t00008	LOC_Os09g31458.1	Sb08g020680.1	GRMZM2G334041_P01	Bradi4g37710.2
AC243248.t00009	LOC_Os06g47330.1	Sb10g027960.1	GRMZM2G113613_P01	Bradi1g33310.1			AC243248.t00009	LOC_Os09g32440.1	Sb08g020880.1	GRMZM2G336137_P01	Bradi4g40640.1
AC243248.t00010	LOC_Os06g47340.1	Sb10g027970.1	GRMZM2G113655_P01	Bradi1g33320.3			AC243248.t00010	LOC_Os09g36320.1	Sb08g021650.1	GRMZM2G339562_P01	Bradi4g41140.1
AC243248.t00011	LOC_Os08g40050.1	Sb09g027900.1	GRMZM2G010548_P01	0			AC243248.t00011	LOC_Os09g36340.1	Sb08g023170.1	GRMZM2G341959_P02	Bradi4g42180.1
AC243248.t00012	LOC_Os04g57440.1	Sb10g027980.1	GRMZM2G166603_P01	Bradi5g25640.1			AC243248.t00012	LOC_Os09g36350.1	Sb08g023180.1	GRMZM2G347043_P01	Bradi4g42220.2
AC243248.t00013	LOC_Os04g55650.1	Sb10g028000.1	GRMZM2G150276_P01	Bradi5g24030.3			AC243248.t00013	LOC_Os09g36360.1	Sb08g023200.1	GRMZM2G348914_P01	Bradi5g01770.1
AC243249.t00001	LOC_Os03g25030.1	Sb02g040890.1	GRMZM2G117754_P02	Bradi1g19840.1			AC243249.t00001	LOC_Os09g36440.1	Sb08g023210.1	GRMZM2G349344_P01	Bradi5g01770.1
AC243249.t00002	LOC_Os03g25050.1	Sb01g034530.1	GRMZM2G073401_P01	Bradi1g19860.1			AC243249.t00002	LOC_Os09g36450.2	Sb08g023220.1	GRMZM2G358827_P01	Bradi5g02180.1
AC243249.t00003	LOC_Os04g40380.1	Sb07g001530.1	GRMZM2G037023_P01	0			AC243249.t00003	LOC_Os09g36480.1	Sb08g023230.1	GRMZM2G360439_P01	Bradi5g02420.1
AC243249.t00004	LOC_Os07g44710.1	Sb01g034520.1	GRMZM2G422576_P03	Bradi1g35090.1			AC243249.t00004	LOC_Os09g36490.1	Sb08g023250.1	GRMZM2G360439_P01	Bradi5g04060.1
AC243249.t00005	LOC_Os06g42890.1	Sb05g001130.1	GRMZM2G026879_P01	Bradi1g42330.1			AC243249.t00005	LOC_Os09g36500.1	Sb08g023260.1	GRMZM2G362848_P01	Bradi5g04800.1
AC243249.t00006	LOC_Os03g25110.1	Sb01g034510.1	GRMZM5G808350_P02	Bradi1g61630.1			AC243249.t00006	LOC_Os09g38200.1	Sb08g023300.1	GRMZM2G362904_P01	Bradi5g08200.1
AC243249.t00007	LOC_Os03g25120.1	Sb01g034500.1	AC216247.3_FGP001	Bradi1g61620.1			AC243249.t00007	LOC_Os09g38420.1	Sb08g023310.1	GRMZM2G365282_P01	Bradi5g08230.5
AC243249.t00008	LOC_Os03g25130.2	Sb01g034490.1	GRMZM2G117779_P01	Bradi1g61610.2			AC243249.t00008	LOC_Os09g38440.1	Sb08g023310.1	GRMZM2G365613_P01	Bradi5g10260.1
AC243249.t00009	0	0	0	0			AC243249.t00009	LOC_Os09g38440.1	Sb08g023310.1	GRMZM2G366698_P01	Bradi5g10290.1
AC243249.t00010	LOC_Os03g25140.1	Sb01g034480.1	GRMZM2G117746_P01	Bradi1g61590.1			AC243249.t00010	LOC_Os09g38450.1	Sb09g005680.1	GRMZM2G366698_P01	Bradi5g10300.1
AC243249.t00011	LOC_Os03g25150.1	Sb01g034470.1	GRMZM2G119067_P01	Bradi1g61580.1			AC243249.t00011	LOC_Os09g38500.2	Sb09g005680.1	GRMZM2G366698_P03	Bradi5g10310.3
AC243249.t00012	LOC_Os07g49520.1	Sb06g013940.1	GRMZM2G151169_P01	Bradi5g08230.5			AC243249.t00012	LOC_Os09g38510.1	Sb09g006050.1	GRMZM2G375856_P01	Bradi5g10330.1
AC243249.t00013	LOC_Os03g25320.1	Sb01g034420.1	GRMZM2G168073_P01	Bradi1g61550.1			AC243249.t00013	LOC_Os09g38520.1	Sb09g008630.1	GRMZM2G381822_P01	Bradi5g10330.1
AC243249.t00014	LOC_Os11g24110.1	Sb09g008630.1	0	0			AC243249.t00014	LOC_Os09g38530.1	Sb09g008870.1	GRMZM2G388045_P01	Bradi5g10360.1
AC243249.t00015	LOC_Os03g25320.1	Sb01g034420.1	GRMZM2G024234_P01	Bradi1g61550.1			AC243249.t00015	LOC_Os09g38540.1	Sb09g014000.1	GRMZM2G393157_P01	Bradi5g10380.1
AC243249.t00016	LOC_Os03g25320.1	Sb01g034420.1	GRMZM2G024234_P01	Bradi1g61550.1			AC243249.t00016	LOC_Os09g38550.2	Sb09g014230.1	GRMZM2G393157_P01	Bradi5g10390.1
AC243249.t00017	LOC_Os03g25330.1	Sb01g034430.2	GRMZM2G040638_P01	Bradi1g61540.1			AC243249.t00017	LOC_Os10g01060.1	Sb09g020940.1	GRMZM2G393157_P01	Bradi5g10400.1
AC243249.t00018	LOC_Os03g25360.1	Sb01g034420.1	GRMZM2G024234_P01	Bradi1g61530.1			AC243249.t00018	LOC_Os10g01750.1	Sb09g020940.1	GRMZM2G393157_P01	Bradi5g11930.1
AC243249.t00019	LOC_Os03g60080.1	Sb01g034410.1	GRMZM2G347043_P01	Bradi1g17480.1			AC243249.t00019	LOC_Os10g36680.1	Sb09g020970.1	GRMZM2G394941_P01	Bradi5g15770.1
AC243249.t00020	LOC_Os03g25380.1	Sb05g001460.1	GRMZM2G020864_P03	Bradi1g61520.1			AC243249.t00020	LOC_Os10g36690.4	Sb09g021000.1	GRMZM2G399325_P01	Bradi5g15780.1
AC243249.t00021	LOC_Os03g25400.1	Sb01g034390.1	GRMZM2G107196_P02	Bradi1g61500.1			AC243249.t00021	LOC_Os10g36703.1	Sb09g021040.1	GRMZM2G401830_P01	Bradi5g15790.1
AC243250.t00001	LOC_Os04g54002.1	Sb06g029725.1	GRMZM2G010962_P01	Bradi5g22980.1			AC243250.t00001	LOC_Os10g36710.1	Sb09g021060.1	GRMZM2G406313_P01	Bradi5g15800.1
AC243250.t00002	LOC_Os04g53994.1	Sb06g029725.1	GRMZM2G175258_P01	Bradi5g22930.1			AC243250.t00002	LOC_Os10g37170.1	Sb09g021080.1	GRMZM2G409213_P01	Bradi5g15800.1
AC243250.t00003	LOC_Os04g54002.1	Sb06g029725.1	GRMZM2G010962_P01	Bradi5g22980.1			AC243250.t00003	LOC_Os10g41780.3	Sb09g021090.1	GRMZM2G409224_P03	Bradi5g15800.1
AC243250.t00004	LOC_Os12g40419.2	Sb08g020880.1	GRMZM2G038893_P01	Bradi4g02230.1			AC243250.t00004	LOC_Os10g42090.2	Sb09g021100.1	GRMZM2G409224_P03	Bradi5g15810.1
AC243250.t00005	0	0	0	0			AC243250.t00005	LOC_Os10g42100.1	Sb09g021110.1	GRMZM2G410338_P01	Bradi5g15820.1
AC243250.t00006	LOC_Os04g53998.1	Sb06g029725.1	GRMZM2G160853_P01	Bradi5g22980.1			AC243250.t00006	LOC_Os10g42110.1	Sb09g021140.1	GRMZM2G410766_P01	Bradi5g18170.1
AC243250.t00007	LOC_Os04g53994.1	Sb02g032130.1	GRMZM2G175258_P01	Bradi5g22930.1			AC243250.t00007	LOC_Os11g06390.6	Sb09g025520.1	GRMZM2G411044_P01	Bradi5g18230.1
AC243250.t00008	LOC_Os04g54070.1	Sb06g029740.1	GRMZM2G000620_P01	Bradi3g00950.1			AC243250.t00008	LOC_Os11g06460.1	Sb09g025520.1	GRMZM2G422576_P03	Bradi5g22690.1
AC243251.t00001	LOC_Os07g03830.1	Sb02g002240.1	GRMZM2G328258_P01	Bradi1g54170.1			AC243251.t00001	LOC_Os11g06610.1	Sb09g025520.1	GRMZM2G423472_P01	Bradi5g22690.1
AC243251.t00002	LOC_Os07g03820.1	Sb10g011000.1	GRMZM2G142037_P01	Bradi1g54160.1			AC243251.t00002	LOC_Os11g06610.1	Sb09g027900.1	GRMZM2G423476_P01	Bradi5g22930.1
AC243251.t00003	LOC_Os07g15880.1	Sb02g008640.1	AC217358.3_FGP005	Bradi1g53070.1			AC243251.t00003	LOC_Os11g06780.1	Sb10g001250.1	GRMZM2G429540_P01	Bradi5g22930.1
AC243251.t00004	0	0	0	0			AC243251.t00004	LOC_Os11g07830.1	Sb10g001960.2	GRMZM2G433333_P02	Bradi5g22980.1
AC243251.t00005	LOC_Os07g15680.1	Sb02g008130.1	GRMZM2G145944_P01	Bradi4g36800.1			AC243251.t00005	LOC_Os11g08380.1	Sb10g004400.1	GRMZM2G435357_P01	Bradi5g22980.1
AC243251.t00006	LOC_Os07g15670.3	Sb02g008120.2	GRMZM2G145895_P01	Bradi1g53100.5			AC243251.t00006	LOC_Os11g08400.1	Sb10g005340.1	GRMZM2G435357_P01	Bradi5g22980.1
AC243251.t00007	LOC_Os07g13890.1	Sb02g008113.1	GRMZM2G156490_P01	Bradi1g54770.1			AC243251.t00007	LOC_Os11g08410.1	Sb10g005530.1	GRMZM2G441347_P01	Bradi5g24030.3
AC243252.t00001	LOC_Os03g58490.2	Sb01g004990.1	GRMZM2G163912_P01	Bradi2g51510.1			AC243252.t00001	LOC_Os11g11410.1	Sb10g009420.1	GRMZM2G448687_P01	Bradi5g25640.1
AC243252.t00002	LOC_Os03g58470.1	Sb01g005010.1	GRMZM2G003002_P03	Bradi1g05330.1			AC243252.t00002	LOC_Os11g11430.2	Sb10g010730.1	GRMZM2G449875_P01	Bradi5g25890.1
AC243252.t00003	LOC_Os07g08660.1	Sb02g004720.1	GRMZM2G111172_P01	Bradi1g55280.1			AC243252.t00003	LOC_Os11g11490.1	Sb10g011000.1	GRMZM2G456217_P01
AC243252.t00004	LOC_Os03g58420.2	Sb01g005070.1	GRMZM2G164082_P01	Bradi1g14300.3			AC243252.t00004	LOC_Os11g14220.1	Sb10g011070.1	GRMZM2G457523_P01
AC243252.t00005	LOC_Os03g58400.1	Sb01g005084.1	GRMZM2G334041_P01	Bradi1g05380.1			AC243252.t00005	LOC_Os11g24110.1	Sb10g011090.1	GRMZM2G457544_P01
AC243252.t00006	0	Sb01g005090.1	GRMZM2G457544_P01	Bradi1g05390.1			AC243252.t00006	LOC_Os11g31020.1	Sb10g011095.1	GRMZM2G461936_P01
AC243252.t00007	LOC_Os06g06740.1	Sb08g004250.1	GRMZM5G870592_P01	Bradi2g54640.1			AC243252.t00007	LOC_Os11g33260.1	Sb10g021360.1	GRMZM2G461936_P01
AC243252.t00008	LOC_Os07g08460.1	Sb01g005110.1	GRMZM5G809195_P01	Bradi1g05410.1			AC243252.t00008	LOC_Os11g40590.3	Sb10g022190.1	GRMZM2G467893_P01
AC243252.t00009	LOC_Os03g58340.1	Sb01g005120.1	GRMZM2G004290_P01	Bradi1g05420.2			AC243252.t00009	LOC_Os11g40600.1	Sb10g022200.1	GRMZM2G469380_P02
AC243252.t00010	LOC_Os03g58260.2	Sb01g005160.1	GRMZM2G015436_P02	Bradi1g05470.1			AC243252.t00010	LOC_Os11g40610.5	Sb10g024040.1	GRMZM2G474853_P01
AC243252.t00011	LOC_Os03g58250.1	Sb01g005170.1	GRMZM2G016150_P01	Bradi1g05480.1			AC243252.t00011	LOC_Os11g41120.1	Sb10g024040.1	GRMZM2G475956_P01
AC243252.t00012	LOC_Os03g58240.1	Sb01g005180.1	GRMZM2G305254_P06	Bradi1g05490.1			AC243252.t00012	LOC_Os11g41390.1	Sb10g024070.1	GRMZM2G485559_P01
AC243253.t00001	LOC_Os02g27620.2	Sb07g026650.1	GRMZM2G366698_P01	Bradi3g43460.1			AC243253.t00001	LOC_Os11g42630.1	Sb10g024080.1	GRMZM2G571942_P01
AC243253.t00002	LOC_Os09g32440.1	Sb02g028990.1	GRMZM2G366698_P01	Bradi3g43460.1			AC243253.t00002	LOC_Os11g43700.1	Sb10g025110.1	GRMZM2G703021_P01
AC243253.t00003	LOC_Os08g41270.1	Sb07g026650.1	GRMZM2G366698_P03	Bradi3g43460.1			AC243253.t00003	LOC_Os12g05920.1	Sb10g025800.1	GRMZM5G800586_P01
AC243253.t00004	0	0	0	0			AC243253.t00004	LOC_Os12g09530.1	Sb10g027920.1	GRMZM5G800586_P01
AC243253.t00005	LOC_Os12g28210.1	0	0	0			AC243253.t00005	LOC_Os12g19960.1	Sb10g027930.1	GRMZM5G808350_P02
AC243253.t00006	LOC_Os08g21840.1	Sb03g012270.1	GRMZM2G058923_P01	Bradi3g20440.1			AC243253.t00006	LOC_Os12g26020.1	Sb10g027960.1	GRMZM5G809195_P01
AC243253.t00007	0	0	0	0			AC243253.t00007	LOC_Os12g26290.4	Sb10g027960.1	GRMZM5G824534_P02
AC243253.t00008	LOC_Os02g27490.2	Sb02g030200.2	GRMZM2G149619_P01	Bradi3g43450.1			AC243253.t00008	LOC_Os12g28210.1	Sb10g027970.1	GRMZM5G825707_P02
AC243253.t00009	LOC_Os02g27480.1	Sb04g018940.1	GRMZM2G012046_P01	Bradi3g43420.1			AC243253.t00009	LOC_Os12g28210.1	Sb10g027980.1	GRMZM5G843192_P01
AC243253.t00010	LOC_Os02g27480.4	Sb04g018940.1	GRMZM2G012046_P01	Bradi3g43420.1			AC243253.t00010	LOC_Os12g36270.1	Sb10g028000.1	GRMZM5G852968_P03
AC243253.t00011	LOC_Os01g32510.1	0	0	0			AC243253.t00011	LOC_Os12g36400.1	Sb10g028840.1	GRMZM5G854264_P01
AC243253.t00012	LOC_Os07g40320.1	Sb02g038200.1	GRMZM2G309970_P01	Bradi1g22800.1			AC243253.t00012	LOC_Os12g40419.2		GRMZM5G862817_P04
AC243254.t00001	0	0	0	0			AC243254.t00001	LOC_Os12g44240.1		GRMZM5G870592_P01
AC243254.t00002	0	0	0	0			AC243254.t00002	LOC_Os12g44250.1		GRMZM5G873277_P01
AC243254.t00003	LOC_Os04g35380.1	Sb06g017010.1	GRMZM2G047705_P03	Bradi5g10400.1			AC243254.t00003	LOC_Os12g44300.1		GRMZM5G877647_P01
AC243254.t00004	LOC_Os04g35300.1	Sb06g017000.1	GRMZM2G047512_P02	Bradi5g10390.1			AC243254.t00004	LOC_Os12g44310.1		GRMZM5G879570_P02
AC243254.t00005	LOC_Os04g35290.1	Sb06g016990.1	GRMZM2G176443_P02	Bradi5g10380.1			AC243254.t00005	LOC_Os12g44310.1		GRMZM5G885766_P01
AC243254.t00006	LOC_Os04g35280.1	Sb04g029440.1	GRMZM2G136139_P01	Bradi5g10360.1			AC243254.t00006	LOC_Os12g44310.2
AC243254.t00007	LOC_Os02g27769.1	Sb04g019000.1	GRMZM2G066222_P01	0			AC243254.t00007	LOC_Os12g44310.2
AC243254.t00008	LOC_Os04g35260.1	Sb06g016980.1	GRMZM2G013283_P02	Bradi5g10330.1			AC243254.t00008	LOC_Os12g44320.1
AC243254.t00009	LOC_Os04g35260.1	Sb06g017220.1	GRMZM2G013283_P02	Bradi5g10330.1			AC243254.t00009	LOC_Os12g44370.1
AC243254.t00010	LOC_Os08g39160.1	Sb06g016970.1	GRMZM2G155626_P01	Bradi5g10310.3			AC243254.t00010	LOC_Os12g44380.1
AC243254.t00011	LOC_Os04g35240.1	Sb06g016960.1	GRMZM2G155593_P01	Bradi5g10300.1			AC243254.t00011	LOC_Os12g44380.2
AC243254.t00012	LOC_Os02g29220.1	Sb06g016950.1	GRMZM2G330424_P01	Bradi5g10290.1			AC243254.t00012	LOC_Os12g44380.3
AC243254.t00013	LOC_Os04g35210.1	Sb06g016947.1	GRMZM2G029211_P01	Bradi4g08710.1			AC243254.t00013
AC243254.t00014	0	0	0	0			AC243254.t00014
AC243254.t00015	LOC_Os10g01060.1	Sb06g017260.1	GRMZM2G018059_P02	Bradi1g61450.1			AC243254.t00015
AC243254.t00016	LOC_Os04g35190.1	Sb06g016930.1	GRMZM2G117633_P03	Bradi5g10260.1			AC243254.t00016
AC243255.t00001	LOC_Os11g43700.1	Sb05g027300.1	GRMZM2G077068_P01	Bradi3g60980.1			AC243255.t00001
AC243255.t00002	LOC_Os05g51500.1	Sb08g016090.1	GRMZM2G023418_P01	Bradi4g06730.1			AC243255.t00002
AC243255.t00003	0	0	0	0			AC243255.t00003
AC243256.t00001	LOC_Os03g47760.1	Sb01g011950.1	GRMZM2G448687_P01	Bradi1g12490.1			AC243256.t00001
AC243256.t00002	LOC_Os03g47770.1	Sb01g011940.1	GRMZM2G116840_P04	Bradi1g12480.1			AC243256.t00002
AC243256.t00003	LOC_Os03g47780.1	Sb05g023230.1	GRMZM2G094959_P05	Bradi2g60690.1			AC243256.t00003
AC243256.t00004	LOC_Os03g47790.3	Sb01g011920.2	GRMZM2G003607_P01	Bradi1g12470.2			AC243256.t00004
AC243256.t00005	LOC_Os03g47800.1	Sb01g011910.1	GRMZM2G083783_P01	Bradi1g12460.1			AC243256.t00005
AC243256.t00006	LOC_Os09g08190.1	Sb01g011900.1	GRMZM2G341959_P02	Bradi4g08950.1			AC243256.t00006
AC243256.t00007	LOC_Os03g47810.1	Sb01g011890.1	GRMZM2G467893_P01	Bradi1g12440.1			AC243256.t00007
AC243256.t00008	LOC_Os03g47830.1	Sb01g011880.1	GRMZM2G461936_P01	Bradi1g05160.1			AC243256.t00008
AC243256.t00009	LOC_Os03g47830.1	Sb01g011870.1	GRMZM2G461936_P01	Bradi1g12430.1			AC243256.t00009
AC243257.t00001	0	0	0	0			AC243257.t00001
AC243257.t00002	LOC_Os02g49470.1	0	GRMZM2G317451_P01	Bradi3g56350.1			AC243257.t00002
AC243257.t00003	LOC_Os06g17390.1	Sb04g029280.1	GRMZM2G020285_P01	Bradi1g43560.1			AC243257.t00003
AC243257.t00004	LOC_Os02g49450.1	Sb04g029290.1	GRMZM2G127548_P01	Bradi3g56370.1			AC243257.t00004
AC243257.t00005	LOC_Os02g49450.1	Sb04g029290.1	GRMZM2G127548_P01	Bradi3g56370.1			AC243257.t00005
AC243257.t00006	LOC_Os02g49450.1	Sb04g029290.1	GRMZM2G127548_P01	Bradi3g56370.1			AC243257.t00006
AC243257.t00007	LOC_Os02g49440.1	Sb04g029300.1	GRMZM2G394941_P01	Bradi3g56380.1			AC243257.t00007
AC243257.t00008	LOC_Os02g49360.1	Sb04g029360.1	GRMZM2G312944_P01	Bradi3g56410.1			AC243257.t00008
AC243257.t00009	LOC_Os02g49350.1	Sb10g010730.1	GRMZM2G011951_P01	Bradi5g25890.1			AC243257.t00009
AC243257.t00010	LOC_Os02g48870.1	Sb04g029400.1	GRMZM2G124684_P01	Bradi3g53620.1			AC243257.t00010
AC243257.t00011	LOC_Os04g15800.1	Sb06g003210.1	GRMZM2G177596_P01	Bradi5g04060.1			AC243257.t00011
AC243257.t00012	LOC_Os02g49340.1	Sb04g029410.1	GRMZM2G011951_P03	Bradi1g43430.1			AC243257.t00012
AC243257.t00013	LOC_Os02g49332.2	Sb04g029420.1	GRMZM2G012044_P01	Bradi3g56440.1			AC243257.t00013
AC243257.t00014	LOC_Os02g49332.1	Sb04g029420.1	GRMZM2G012044_P01	Bradi3g56440.1			AC243257.t00014
AC243257.t00015	LOC_Os02g49326.1	Sb04g029430.1	GRMZM2G077258_P03	Bradi3g56450.4			AC243257.t00015
AC243257.t00016	LOC_Os02g49320.1	Sb04g029450.1	GRMZM2G020775_P01	Bradi3g56460.1			AC243257.t00016
AC243257.t00017	LOC_Os02g49310.1	Sb04g029460.1	GRMZM2G020938_P03	Bradi1g43350.1			AC243257.t00017
AC243257.t00018	LOC_Os02g49260.1	Sb04g029470.1	GRMZM2G075372_P01	Bradi3g56480.1			AC243257.t00018
AC243257.t00019	0	Sb04g029480.1	GRMZM2G042198_P01	Bradi3g56490.3			AC243257.t00019
AC243257.t00020	0	0	AC189883.3_FGP002	0			AC243257.t00020
AC243258.t00001	0	Sb01g017450.1	GRMZM2G026800_P01	Bradi3g30740.3			AC243258.t00001
AC243258.t00002	0	Sb01g017440.1	GRMZM2G339562_P01	Bradi3g30730.1			AC243258.t00002
AC243258.t00003	LOC_Os11g06390.6	Sb01g017430.1	GRMZM2G082484_P01	Bradi3g30710.2			AC243258.t00003
AC243258.t00004	LOC_Os08g08140.1	Sb01g017420.1	GRMZM2G330751_P01	Bradi3g15480.1			AC243258.t00004
AC243258.t00005	0	Sb01g017400.1	GRMZM2G475956_P01	Bradi3g30690.1			AC243258.t00005
AC243258.t00006	LOC_Os10g36680.1	Sb01g017350.1	GRMZM2G172451_P01	Bradi3g30680.1			AC243258.t00006
AC243258.t00007	LOC_Os10g36690.4	Sb01g017340.1	GRMZM2G114570_P04	Bradi3g30670.3			AC243258.t00007
AC243258.t00008	0	0	0	0			AC243258.t00008
AC243258.t00009	LOC_Os10g36703.1	Sb01g017330.1	GRMZM2G113135_P01	Bradi3g30660.1			AC243258.t00009
AC243258.t00010	LOC_Os10g36710.1	Sb01g017320.1	GRMZM2G031893_P01	Bradi3g30650.1			AC243258.t00010
AC243259.t00001	LOC_Os03g57760.2	Sb01g005550.1	GRMZM2G120596_P02	Bradi2g08010.1			AC243259.t00001
AC243259.t00002	LOC_Os01g40094.1	Sb03g026070.1	GRMZM2G134628_P01	Bradi2g14420.1			AC243259.t00002
AC243259.t00003	LOC_Os03g48140.1	Sb03g026110.1	AC155377.1_FGP001	Bradi2g41980.2			AC243259.t00003
AC243260.t00001	LOC_Os03g49770.1	Sb01g010720.1	GRMZM2G147332_P01	Bradi1g11030.1			AC243260.t00001
AC243260.t00002	LOC_Os03g49800.1	Sb01g010710.1	GRMZM2G157147_P01	Bradi1g11040.1			AC243260.t00002
AC243260.t00003	0	Sb08g019850.1	0	0			AC243260.t00003
AC243260.t00004	LOC_Os03g49830.1	Sb01g010700.1	GRMZM2G090435_P01	Bradi1g11050.1			AC243260.t00004
AC243260.t00005	0	0	0	0			AC243260.t00005
AC243260.t00006	LOC_Os02g12630.1	Sb03g037190.1	GRMZM2G085433_P01	Bradi5g02420.1			AC243260.t00006
AC243260.t00007	0	0	0	0			AC243260.t00007
AC243260.t00008	LOC_Os03g49880.1	Sb01g010690.1	AC233950.1_FGP002	Bradi1g11060.1			AC243260.t00008
AC243260.t00009	0	0	0	0			AC243260.t00009
AC243261.t00001	LOC_Os02g19310.1	Sb05g016840.1	0	0			AC243261.t00001
AC243261.t00002	LOC_Os09g31140.1	Sb10g024040.1	GRMZM2G435357_P01	Bradi1g36070.1			AC243261.t00002
AC243261.t00003	LOC_Os06g40960.1	Sb10g024040.1	GRMZM2G435357_P01	Bradi1g36070.1			AC243261.t00003
AC243261.t00004	LOC_Os12g05920.1	Sb03g028750.1	GRMZM2G433333_P02	Bradi4g42220.2			AC243261.t00004
AC243261.t00005	LOC_Os01g12810.4	Sb02g027050.1	GRMZM2G003869_P01	Bradi2g07630.1			AC243261.t00005
AC243261.t00006	LOC_Os01g12810.4	Sb02g027050.1	GRMZM2G003869_P01	Bradi2g07630.1			AC243261.t00006
AC243261.t00007	LOC_Os01g19280.1	Sb05g007380.1	GRMZM2G103759_P01	0			AC243261.t00007
AC243261.t00008	LOC_Os06g22520.1	0	GRMZM2G393157_P01	0			AC243261.t00008
AC243261.t00009	LOC_Os06g41020.1	Sb10g024070.1	GRMZM5G885766_P01	Bradi1g36030.1			AC243261.t00009
AC243261.t00010	LOC_Os02g10260.1	Sb04g006590.1	GRMZM2G130064_P01	Bradi3g07090.2			AC243261.t00010
AC243261.t00011	LOC_Os06g41030.1	Sb10g024080.1	GRMZM2G000566_P01	Bradi3g07050.1			AC243261.t00011

## Sheet: Gene model
ï»¿ModelID	LocusID	Rice Blast Besthit	Sorghum Blast Besthit	Maize Blast Besthit	Brachypodium Blast Besthit
AC243215.m00001	AC243215.t00001	LOC_Os01g03710.1	Sb0013s006040.1	AC155377.1_FGP001	Bradi1g05160.1
AC243216.m00001	AC243216.t00001	LOC_Os01g12810.4	Sb01g004990.1	AC185108.3_FGP011	Bradi1g05330.1
AC243216.m00002	AC243216.t00002	LOC_Os01g12810.4	Sb01g005010.1	AC189883.3_FGP002	Bradi1g05380.1
AC243216.m00003	AC243216.t00003	LOC_Os01g17240.1	Sb01g005070.1	AC190767.2_FGP001	Bradi1g05390.1
AC243216.m00004	AC243216.t00004	LOC_Os01g19280.1	Sb01g005084.1	AC191380.3_FGP001	Bradi1g05410.1
AC243216.m00005	AC243216.t00005	LOC_Os01g23970.1	Sb01g005090.1	AC191380.3_FGP001	Bradi1g05420.2
AC243216.m00006	AC243216.t00006	LOC_Os01g27890.1	Sb01g005110.1	AC195785.3_FGP004	Bradi1g05470.1
AC243216.m00007	AC243216.t00007	LOC_Os01g32510.1	Sb01g005120.1	AC198324.3_FGP003	Bradi1g05480.1
AC243217.m00001	AC243217.t00001	LOC_Os01g34960.1	Sb01g005160.1	AC209208.3_FGP002	Bradi1g05490.1
AC243217.m00002	AC243217.t00002	LOC_Os01g34960.1	Sb01g005170.1	AC215260.3_FGP001	Bradi1g06110.1
AC243217.m00003	AC243217.t00003	LOC_Os01g40050.2	Sb01g005180.1	AC216247.3_FGP001	Bradi1g06520.3
AC243217.m00004	AC243217.t00004	LOC_Os01g40070.1	Sb01g005550.1	AC217358.3_FGP005	Bradi1g10150.1
AC243217.m00005	AC243217.t00004	LOC_Os01g40094.1	Sb01g005550.1	AC225193.3_FGP004	Bradi1g11030.1
AC243217.m00006	AC243217.t00005	LOC_Os01g40094.1	Sb01g008110.1	AC233950.1_FGP002	Bradi1g11040.1
AC243217.m00007	AC243217.t00006	LOC_Os01g40110.1	Sb01g009560.1	AC234152.1_FGP005	Bradi1g11050.1
AC243217.m00008	AC243217.t00007	LOC_Os01g40190.1	Sb01g010690.1	GRMZM2G000566_P01	Bradi1g11060.1
AC243217.m00009	AC243217.t00007	LOC_Os01g64910.1	Sb01g010700.1	GRMZM2G000620_P01	Bradi1g12430.1
AC243217.m00010	AC243217.t00008	LOC_Os01g65480.1	Sb01g010710.1	GRMZM2G002828_P01	Bradi1g12440.1
AC243217.m00011	AC243217.t00009	LOC_Os01g71800.1	Sb01g010720.1	GRMZM2G002851_P01	Bradi1g12460.1
AC243217.m00012	AC243217.t00010	LOC_Os01g72420.1	Sb01g011870.1	GRMZM2G003002_P03	Bradi1g12470.2
AC243217.m00013	AC243217.t00011	LOC_Os02g03890.1	Sb01g011880.1	GRMZM2G003607_P01	Bradi1g12480.1
AC243217.m00014	AC243217.t00012	LOC_Os02g03980.1	Sb01g011890.1	GRMZM2G003869_P01	Bradi1g12490.1
AC243217.m00015	AC243217.t00012	LOC_Os02g09270.1	Sb01g011900.1	GRMZM2G003869_P01	Bradi1g14300.3
AC243217.m00016	AC243217.t00013	LOC_Os02g09720.1	Sb01g011910.1	GRMZM2G004290_P01	Bradi1g17450.1
AC243217.m00017	AC243217.t00014	LOC_Os02g09720.1	Sb01g011920.2	GRMZM2G006117_P01	Bradi1g17460.1
AC243217.m00018	AC243217.t00015	LOC_Os02g10260.1	Sb01g011940.1	GRMZM2G006416_P01	Bradi1g17480.1
AC243217.m00019	AC243217.t00016	LOC_Os02g12630.1	Sb01g011950.1	GRMZM2G006416_P03	Bradi1g17810.1
AC243218.m00001	AC243218.t00001	LOC_Os02g13330.1	Sb01g017320.1	GRMZM2G008305_P01	Bradi1g18390.1
AC243218.m00002	AC243218.t00002	LOC_Os02g14090.1	Sb01g017330.1	GRMZM2G008327_P01	Bradi1g18420.1
AC243218.m00003	AC243218.t00003	LOC_Os02g18000.1	Sb01g017340.1	GRMZM2G009871_P02	Bradi1g18450.2
AC243218.m00004	AC243218.t00004	LOC_Os02g18070.1	Sb01g017350.1	GRMZM2G010548_P01	Bradi1g18450.2
AC243218.m00005	AC243218.t00005	LOC_Os02g18090.1	Sb01g017400.1	GRMZM2G010962_P01	Bradi1g18470.1
AC243218.m00006	AC243218.t00006	LOC_Os02g18090.1	Sb01g017420.1	GRMZM2G010962_P01	Bradi1g18490.3
AC243218.m00007	AC243218.t00007	LOC_Os02g18090.1	Sb01g017430.1	GRMZM2G011951_P01	Bradi1g18510.1
AC243218.m00008	AC243218.t00008	LOC_Os02g19310.1	Sb01g017440.1	GRMZM2G011951_P03	Bradi1g18510.1
AC243218.m00009	AC243218.t00009	LOC_Os02g19620.1	Sb01g017450.1	GRMZM2G012044_P01	Bradi1g18550.2
AC243218.m00010	AC243218.t00010	LOC_Os02g26850.1	Sb01g022710.1	GRMZM2G012044_P01	Bradi1g18570.1
AC243218.m00011	AC243218.t00011	LOC_Os02g26850.1	Sb01g028180.1	GRMZM2G012046_P01	Bradi1g19840.1
AC243218.m00012	AC243218.t00012	LOC_Os02g27480.1	Sb01g028270.1	GRMZM2G012046_P01	Bradi1g19860.1
AC243218.m00013	AC243218.t00013	LOC_Os02g27480.1	Sb01g028460.1	GRMZM2G012046_P01	Bradi1g20970.1
AC243219.m00001	AC243219.t00001	LOC_Os02g27480.4	Sb01g028460.1	GRMZM2G012865_P01	Bradi1g22690.1
AC243219.m00002	AC243219.t00002	LOC_Os02g27490.2	Sb01g028470.1	GRMZM2G013283_P02	Bradi1g22800.1
AC243219.m00003	AC243219.t00003	LOC_Os02g27620.2	Sb01g028480.1	GRMZM2G013283_P02	Bradi1g22860.1
AC243219.m00004	AC243219.t00004	LOC_Os02g27769.1	Sb01g034390.1	GRMZM2G015436_P02	Bradi1g22870.1
AC243219.m00005	AC243219.t00005	LOC_Os02g29220.1	Sb01g034410.1	GRMZM2G016150_P01	Bradi1g22890.1
AC243219.m00006	AC243219.t00006	LOC_Os02g29960.1	Sb01g034420.1	GRMZM2G018024_P01	Bradi1g22910.1
AC243220.m00001	AC243220.t00001	LOC_Os02g29960.1	Sb01g034420.1	GRMZM2G018059_P02	Bradi1g22920.1
AC243220.m00002	AC243220.t00002	LOC_Os02g29960.1	Sb01g034420.1	GRMZM2G020285_P01	Bradi1g22930.1
AC243220.m00003	AC243220.t00003	LOC_Os02g30460.1	Sb01g034420.1	GRMZM2G020409_P01	Bradi1g22940.1
AC243220.m00004	AC243220.t00004	LOC_Os02g30470.1	Sb01g034430.2	GRMZM2G020775_P01	Bradi1g25740.1
AC243220.m00005	AC243220.t00005	LOC_Os02g30610.2	Sb01g034470.1	GRMZM2G020864_P03	Bradi1g25900.1
AC243220.m00006	AC243220.t00006	LOC_Os02g30610.2	Sb01g034480.1	GRMZM2G020938_P03	Bradi1g31010.1
AC243220.m00007	AC243220.t00007	LOC_Os02g30620.3	Sb01g034490.1	GRMZM2G023418_P01	Bradi1g33290.1
AC243220.m00008	AC243220.t00008	LOC_Os02g30630.2	Sb01g034500.1	GRMZM2G024234_P01	Bradi1g33300.1
AC243220.m00009	AC243220.t00009	LOC_Os02g30650.1	Sb01g034510.1	GRMZM2G024234_P01	Bradi1g33310.1
AC243220.m00010	AC243220.t00010	LOC_Os02g35200.1	Sb01g034520.1	GRMZM2G024234_P01	Bradi1g33310.1
AC243220.m00011	AC243220.t00011	LOC_Os02g41520.1	Sb01g034530.1	GRMZM2G025002_P01	Bradi1g33320.3
AC243220.m00012	AC243220.t00012	LOC_Os02g41580.1	Sb01g034710.1	GRMZM2G026737_P01	Bradi1g34060.1
AC243220.m00013	AC243220.t00013	LOC_Os02g44500.1	Sb01g035420.1	GRMZM2G026800_P01	Bradi1g35090.1
AC243221.m00001	AC243221.t00001	LOC_Os02g44610.1	Sb01g040210.1	GRMZM2G026879_P01	Bradi1g36030.1
AC243221.m00002	AC243221.t00002	LOC_Os02g44610.1	Sb01g040220.1	GRMZM2G026881_P01	Bradi1g36070.1
AC243221.m00003	AC243221.t00003	LOC_Os02g44630.2	Sb01g040230.1	GRMZM2G029211_P01	Bradi1g36070.1
AC243221.m00004	AC243221.t00004	LOC_Os02g44642.1	Sb01g040240.1	GRMZM2G030275_P04	Bradi1g37810.1
AC243222.m00001	AC243222.t00001	LOC_Os02g44670.1	Sb01g040250.1	GRMZM2G030567_P01	Bradi1g37830.2
AC243222.m00002	AC243222.t00002	LOC_Os02g44680.1	Sb01g040260.1	GRMZM2G031893_P01	Bradi1g42330.1
AC243222.m00003	AC243222.t00003	LOC_Os02g48870.1	Sb01g040270.1	GRMZM2G033526_P01	Bradi1g42970.1
AC243222.m00004	AC243222.t00004	LOC_Os02g48870.1	Sb01g040330.1	GRMZM2G035256_P01	Bradi1g42980.1
AC243223.m00001	AC243223.t00001	LOC_Os02g49260.1	Sb01g046340.1	GRMZM2G036720_P01	Bradi1g42980.1
AC243223.m00002	AC243223.t00002	LOC_Os02g49310.1	Sb01g047540.1	GRMZM2G037015_P01	Bradi1g42980.1
AC243223.m00003	AC243223.t00003	LOC_Os02g49320.1	Sb01g047540.1	GRMZM2G037023_P01	Bradi1g42980.1
AC243223.m00004	AC243223.t00004	LOC_Os02g49326.1	Sb01g047540.1	GRMZM2G038487_P04	Bradi1g42980.1
AC243223.m00005	AC243223.t00005	LOC_Os02g49332.1	Sb01g047540.1	GRMZM2G038893_P01	Bradi1g42990.1
AC243224.m00001	AC243224.t00001	LOC_Os02g49332.2	Sb01g049360.1	GRMZM2G040638_P01	Bradi1g43000.2
AC243224.m00002	AC243224.t00002	LOC_Os02g49340.1	Sb01g049390.1	GRMZM2G041394_P01	Bradi1g43350.1
AC243224.m00003	AC243224.t00003	LOC_Os02g49340.1	Sb01g049400.1	GRMZM2G042198_P01	Bradi1g43430.1
AC243225.m00001	AC243225.t00001	LOC_Os02g49350.1	Sb02g000750.1	GRMZM2G044301_P01	Bradi1g43430.1
AC243225.m00002	AC243225.t00002	LOC_Os02g49360.1	Sb02g000900.1	GRMZM2G046529_P02	Bradi1g43560.1
AC243225.m00003	AC243225.t00003	LOC_Os02g49440.1	Sb02g001280.1	GRMZM2G047512_P02	Bradi1g43890.1
AC243225.m00004	AC243225.t00004	LOC_Os02g49450.1	Sb02g002240.1	GRMZM2G047705_P03	Bradi1g47450.1
AC243225.m00005	AC243225.t00005	LOC_Os02g49450.1	Sb02g004205.1	GRMZM2G047995_P07	Bradi1g49320.1
AC243225.m00006	AC243225.t00006	LOC_Os02g49450.1	Sb02g004720.1	GRMZM2G048210_P02	Bradi1g50720.1
AC243225.m00007	AC243225.t00007	LOC_Os02g49470.1	Sb02g008113.1	GRMZM2G048912_P02	Bradi1g53070.1
AC243225.m00008	AC243225.t00007	LOC_Os02g56840.1	Sb02g008120.2	GRMZM2G049541_P01	Bradi1g53100.5
AC243225.m00009	AC243225.t00008	LOC_Os02g57490.1	Sb02g008130.1	GRMZM2G050714_P01	Bradi1g53740.2
AC243225.m00010	AC243225.t00009	LOC_Os03g02660.1	Sb02g008640.1	GRMZM2G050714_P01	Bradi1g54160.1
AC243225.m00011	AC243225.t00010	LOC_Os03g02670.2	Sb02g024770.1	GRMZM2G053434_P02	Bradi1g54170.1
AC243225.m00012	AC243225.t00011	LOC_Os03g02680.2	Sb02g024800.1	GRMZM2G054634_P01	Bradi1g54680.1
AC243225.m00013	AC243225.t00012	LOC_Os03g02680.2	Sb02g025850.1	GRMZM2G055263_P01	Bradi1g54770.1
AC243225.m00014	AC243225.t00012	LOC_Os03g13180.1	Sb02g025850.1	GRMZM2G055643_P03	Bradi1g55280.1
AC243226.m00001	AC243226.t00001	LOC_Os03g13180.1	Sb02g025850.1	GRMZM2G056608_P01	Bradi1g61450.1
AC243226.m00002	AC243226.t00002	LOC_Os03g15680.1	Sb02g025930.1	GRMZM2G057243_P01	Bradi1g61500.1
AC243226.m00003	AC243226.t00003	LOC_Os03g15690.1	Sb02g026160.1	GRMZM2G057243_P02	Bradi1g61520.1
AC243226.m00004	AC243226.t00004	LOC_Os03g15700.1	Sb02g027050.1	GRMZM2G057243_P02	Bradi1g61530.1
AC243226.m00005	AC243226.t00005	LOC_Os03g15710.1	Sb02g027050.1	GRMZM2G057243_P02	Bradi1g61540.1
AC243226.m00006	AC243226.t00006	LOC_Os03g15720.2	Sb02g028990.1	GRMZM2G058447_P01	Bradi1g61550.1
AC243226.m00007	AC243226.t00007	LOC_Os03g15730.1	Sb02g030200.2	GRMZM2G058923_P01	Bradi1g61550.1
AC243226.m00008	AC243226.t00008	LOC_Os03g15740.1	Sb02g030970.1	GRMZM2G063566_P02	Bradi1g61550.1
AC243226.m00009	AC243226.t00009	LOC_Os03g24410.1	Sb02g030990.1	GRMZM2G064050_P01	Bradi1g61580.1
AC243226.m00010	AC243226.t00010	LOC_Os03g25030.1	Sb02g030990.1	GRMZM2G064330_P02	Bradi1g61590.1
AC243226.m00011	AC243226.t00011	LOC_Os03g25050.1	Sb02g031000.1	GRMZM2G066222_P01	Bradi1g61610.2
AC243226.m00012	AC243226.t00012	LOC_Os03g25110.1	Sb02g031010.1	GRMZM2G070178_P01	Bradi1g61620.1
AC243226.m00013	AC243226.t00013	LOC_Os03g25120.1	Sb02g031020.1	GRMZM2G071292_P01	Bradi1g61630.1
AC243226.m00014	AC243226.t00014	LOC_Os03g25130.2	Sb02g031020.1	GRMZM2G071362_P01	Bradi1g62420.1
AC243226.m00015	AC243226.t00015	LOC_Os03g25140.1	Sb02g031030.1	GRMZM2G073401_P01	Bradi1g63700.1
AC243226.m00016	AC243226.t00016	LOC_Os03g25150.1	Sb02g031040.1	GRMZM2G073829_P01	Bradi1g67270.1
AC243226.m00017	AC243226.t00017	LOC_Os03g25320.1	Sb02g031040.1	GRMZM2G073829_P01	Bradi1g67280.1
AC243226.m00018	AC243226.t00018	LOC_Os03g25320.1	Sb02g031060.1	GRMZM2G075372_P01	Bradi1g67290.5
AC243226.m00019	AC243226.t00019	LOC_Os03g25320.1	Sb02g031060.1	GRMZM2G075499_P01	Bradi1g67310.1
AC243226.m00020	AC243226.t00020	LOC_Os03g25330.1	Sb02g031070.1	GRMZM2G075618_P01	Bradi1g67320.1
AC243227.m00001	AC243227.t00001	LOC_Os03g25360.1	Sb02g031080.1	GRMZM2G076981_P02	Bradi1g67330.1
AC243227.m00002	AC243227.t00002	LOC_Os03g25380.1	Sb02g032130.1	GRMZM2G077068_P01	Bradi1g67340.1
AC243227.m00003	AC243227.t00003	LOC_Os03g25400.1	Sb02g032440.1	GRMZM2G077258_P03	Bradi1g68000.2
AC243227.m00004	AC243227.t00004	LOC_Os03g32220.1	Sb02g032450.1	GRMZM2G077632_P02	Bradi1g68440.1
AC243227.m00005	AC243227.t00005	LOC_Os03g36000.1	Sb02g032470.1	GRMZM2G077845_P01	Bradi1g68930.1
AC243227.m00006	AC243227.t00006	LOC_Os03g42520.1	Sb02g032470.1	GRMZM2G077951_P01	Bradi1g69950.1
AC243227.m00007	AC243227.t00007	LOC_Os03g42530.1	Sb02g032480.1	GRMZM2G080724_P01	Bradi1g77330.1
AC243227.m00008	AC243227.t00008	LOC_Os03g47760.1	Sb02g032490.1	GRMZM2G081639_P01	Bradi1g77330.1
AC243228.m00001	AC243228.t00001	LOC_Os03g47770.1	Sb02g032510.1	GRMZM2G081639_P01	Bradi1g77330.1
AC243228.m00002	AC243228.t00002	LOC_Os03g47780.1	Sb02g032520.1	GRMZM2G081682_P01	Bradi1g78240.1
AC243228.m00003	AC243228.t00003	LOC_Os03g47790.3	Sb02g032530.1	GRMZM2G082484_P01	Bradi1g78250.2
AC243228.m00004	AC243228.t00004	LOC_Os03g47800.1	Sb02g032540.1	GRMZM2G083783_P01	Bradi2g01950.1
AC243228.m00005	AC243228.t00005	LOC_Os03g47810.1	Sb02g033740.1	GRMZM2G085433_P01	Bradi2g07300.1
AC243228.m00006	AC243228.t00006	LOC_Os03g47830.1	Sb02g036210.1	GRMZM2G089557_P01	Bradi2g07630.1
AC243228.m00007	AC243228.t00007	LOC_Os03g47830.1	Sb02g038000.1	GRMZM2G089767_P01	Bradi2g07630.1
AC243228.m00008	AC243228.t00008	LOC_Os03g48140.1	Sb02g038020.1	GRMZM2G089806_P01	Bradi2g08010.1
AC243228.m00009	AC243228.t00009	LOC_Os03g49150.1	Sb02g038030.1	GRMZM2G090435_P01	Bradi2g14420.1
AC243228.m00010	AC243228.t00010	LOC_Os03g49770.1	Sb02g038040.1	GRMZM2G091245_P01	Bradi2g19150.1
AC243228.m00011	AC243228.t00011	LOC_Os03g49800.1	Sb02g038050.2	GRMZM2G091586_P03	Bradi2g19270.1
AC243228.m00012	AC243228.t00012	LOC_Os03g49830.1	Sb02g038070.1	GRMZM2G092104_P01	Bradi2g19520.1
AC243228.m00013	AC243228.t00013	LOC_Os03g49880.1	Sb02g038080.1	GRMZM2G092160_P03	Bradi2g24680.1
AC243228.m00014	AC243228.t00014	LOC_Os03g57760.2	Sb02g038090.1	GRMZM2G092160_P03	Bradi2g24690.4
AC243228.m00015	AC243228.t00015	LOC_Os03g58240.1	Sb02g038110.1	GRMZM2G092739_P01	Bradi2g24690.4
AC243228.m00016	AC243228.t00016	LOC_Os03g58250.1	Sb02g038140.1	GRMZM2G093316_P02	Bradi2g24700.1
AC243229.m00001	AC243229.t00001	LOC_Os03g58260.2	Sb02g038200.1	GRMZM2G094959_P05	Bradi2g24720.1
AC243229.m00002	AC243229.t00002	LOC_Os03g58340.1	Sb02g038250.1	GRMZM2G095211_P01	Bradi2g26490.1
AC243229.m00003	AC243229.t00003	LOC_Os03g58400.1	Sb02g040890.1	GRMZM2G096412_P01	Bradi2g31080.1
AC243229.m00004	AC243229.t00004	LOC_Os03g58420.2	Sb02g042220.1	GRMZM2G097456_P01	Bradi2g31110.1
AC243229.m00005	AC243229.t00005	LOC_Os03g58470.1	Sb02g042230.1	GRMZM2G099005_P01	Bradi2g31110.2
AC243229.m00006	AC243229.t00006	LOC_Os03g58490.2	Sb02g042240.2	GRMZM2G100776_P01	Bradi2g31530.1
AC243229.m00007	AC243229.t00007	LOC_Os03g60080.1	Sb02g042260.1	GRMZM2G103759_P01	Bradi2g41910.3
AC243229.m00008	AC243229.t00008	LOC_Os03g63570.1	Sb02g042260.1	GRMZM2G103840_P01	Bradi2g41940.1
AC243230.m00001	AC243230.t00001	LOC_Os04g10610.1	Sb02g042280.1	GRMZM2G104198_P01	Bradi2g41950.1
AC243230.m00002	AC243230.t00002	LOC_Os04g11810.1	Sb02g042290.1	GRMZM2G106980_P02	Bradi2g41960.1
AC243230.m00003	AC243230.t00003	LOC_Os04g11810.1	Sb02g042290.1	GRMZM2G107116_P02	Bradi2g41970.1
AC243230.m00004	AC243230.t00004	LOC_Os04g15800.1	Sb02g042310.1	GRMZM2G107116_P02	Bradi2g41980.2
AC243230.m00005	AC243230.t00005	LOC_Os04g21840.1	Sb02g042320.1	GRMZM2G107116_P02	Bradi2g49250.1
AC243230.m00006	AC243230.t00006	LOC_Os04g24040.1	Sb02g042330.1	GRMZM2G107116_P03	Bradi2g51510.1
AC243230.m00007	AC243230.t00007	LOC_Os04g28050.2	Sb02g042330.1	GRMZM2G107196_P02	Bradi2g54640.1
AC243231.m00001	AC243231.t00001	LOC_Os04g35190.1	Sb02g042340.2	GRMZM2G108589_P02	Bradi2g56600.1
AC243231.m00002	AC243231.t00002	LOC_Os04g35210.1	Sb02g042350.1	GRMZM2G111022_P01	Bradi2g60120.1
AC243231.m00003	AC243231.t00003	LOC_Os04g35240.1	Sb02g043230.1	GRMZM2G111022_P01	Bradi2g60690.1
AC243231.m00004	AC243231.t00004	LOC_Os04g35260.1	Sb02g043260.2	GRMZM2G111022_P01	Bradi2g61060.1
AC243231.m00005	AC243231.t00005	LOC_Os04g35260.1	Sb03g007380.2	GRMZM2G111172_P01	Bradi2g61500.2
AC243232.m00001	AC243232.t00001	LOC_Os04g35280.1	Sb03g012270.1	GRMZM2G111872_P01	Bradi3g00950.1
AC243232.m00002	AC243232.t00002	LOC_Os04g35290.1	Sb03g022830.1	GRMZM2G113135_P01	Bradi3g03310.1
AC243232.m00003	AC243232.t00003	LOC_Os04g35300.1	Sb03g026040.1	GRMZM2G113203_P03	Bradi3g04430.1
AC243232.m00004	AC243232.t00004	LOC_Os04g35380.1	Sb03g026050.1	GRMZM2G113613_P01	Bradi3g06240.1
AC243232.m00005	AC243232.t00005	LOC_Os04g36910.1	Sb03g026070.1	GRMZM2G113613_P01	Bradi3g06580.1
AC243232.m00006	AC243232.t00005	LOC_Os04g37790.2	Sb03g026070.1	GRMZM2G113655_P01	Bradi3g07050.1
AC243232.m00007	AC243232.t00006	LOC_Os04g38240.1	Sb03g026080.1	GRMZM2G114570_P04	Bradi3g07090.2
AC243232.m00008	AC243232.t00007	LOC_Os04g38290.1	Sb03g026090.1	GRMZM2G116335_P01	Bradi3g09160.1
AC243232.m00009	AC243232.t00008	LOC_Os04g40380.1	Sb03g026110.1	GRMZM2G116335_P01	Bradi3g10370.1
AC243232.m00010	AC243232.t00009	LOC_Os04g43450.1	Sb03g028750.1	GRMZM2G116840_P04	Bradi3g10370.1
AC243232.m00011	AC243232.t00010	LOC_Os04g43690.2	Sb03g037190.1	GRMZM2G117365_P01	Bradi3g10380.1
AC243232.m00012	AC243232.t00011	LOC_Os04g43730.1	Sb03g041320.1	GRMZM2G117365_P01	Bradi3g10380.1
AC243232.m00013	AC243232.t00012	LOC_Os04g43730.1	Sb03g041320.1	GRMZM2G117365_P01	Bradi3g10380.1
AC243233.m00001	AC243233.t00001	LOC_Os04g43730.1	Sb03g046100.1	GRMZM2G117633_P03	Bradi3g12770.3
AC243233.m00002	AC243233.t00002	LOC_Os04g43740.1	Sb03g046660.1	GRMZM2G117746_P01	Bradi3g15480.1
AC243233.m00003	AC243233.t00003	LOC_Os04g43750.2	Sb04g001756.1	GRMZM2G117754_P02	Bradi3g18350.1
AC243233.m00004	AC243233.t00004	LOC_Os04g43760.1	Sb04g001920.1	GRMZM2G117779_P01	Bradi3g18590.1
AC243233.m00005	AC243233.t00005	LOC_Os04g46810.1	Sb04g001920.1	GRMZM2G118208_P01	Bradi3g18590.1
AC243233.m00006	AC243233.t00006	LOC_Os04g46820.1	Sb04g004030.1	GRMZM2G118628_P01	Bradi3g20440.1
AC243233.m00007	AC243233.t00007	LOC_Os04g51520.1	Sb04g005760.1	GRMZM2G119067_P01	Bradi3g22070.1
AC243233.m00008	AC243233.t00008	LOC_Os04g53994.1	Sb04g006090.1	GRMZM2G119265_P01	Bradi3g22070.1
AC243234.m00001	AC243234.t00001	LOC_Os04g53994.1	Sb04g006100.1	GRMZM2G119270_P01	Bradi3g22350.2
AC243234.m00002	AC243234.t00002	LOC_Os04g53998.1	Sb04g006590.1	GRMZM2G119270_P01	Bradi3g30650.1
AC243234.m00003	AC243234.t00003	LOC_Os04g54002.1	Sb04g008542.1	GRMZM2G119783_P01	Bradi3g30660.1
AC243234.m00004	AC243234.t00004	LOC_Os04g54002.1	Sb04g011040.1	GRMZM2G120574_P01	Bradi3g30670.3
AC243234.m00005	AC243234.t00005	LOC_Os04g54020.1	Sb04g011040.1	GRMZM2G120596_P01	Bradi3g30680.1
AC243234.m00006	AC243234.t00006	LOC_Os04g54070.1	Sb04g011040.1	GRMZM2G120596_P02	Bradi3g30690.1
AC243234.m00007	AC243234.t00007	LOC_Os04g55650.1	Sb04g012900.1	GRMZM2G121066_P01	Bradi3g30710.2
AC243234.m00008	AC243234.t00008	LOC_Os04g57440.1	Sb04g018940.1	GRMZM2G121468_P02	Bradi3g30730.1
AC243235.m00001	AC243235.t00001	LOC_Os05g08310.1	Sb04g018940.1	GRMZM2G123461_P01	Bradi3g30740.3
AC243235.m00002	AC243235.t00002	LOC_Os05g10420.1	Sb04g018940.1	GRMZM2G123996_P01	Bradi3g33920.1
AC243235.m00003	AC243235.t00003	LOC_Os05g10420.1	Sb04g019000.1	GRMZM2G124026_P01	Bradi3g33930.1
AC243235.m00004	AC243235.t00004	LOC_Os05g10730.2	Sb04g020630.1	GRMZM2G124684_P01	Bradi3g33950.1
AC243236.m00001	AC243236.t00001	LOC_Os05g23140.1	Sb04g020640.1	GRMZM2G124684_P01	Bradi3g33950.1
AC243236.m00002	AC243236.t00002	LOC_Os05g23670.1	Sb04g020660.1	GRMZM2G125482_P01	Bradi3g35070.1
AC243236.m00003	AC243236.t00003	LOC_Os05g23670.1	Sb04g020660.1	GRMZM2G125482_P01	Bradi3g35400.2
AC243236.m00004	AC243236.t00004	LOC_Os05g26940.1	Sb04g020670.1	GRMZM2G125668_P01	Bradi3g36100.1
AC243236.m00005	AC243236.t00005	LOC_Os05g27000.1	Sb04g020680.1	GRMZM2G125867_P02	Bradi3g38330.1
AC243236.m00006	AC243236.t00006	LOC_Os05g34820.1	Sb04g020690.1	GRMZM2G127080_P02	Bradi3g43420.1
AC243236.m00007	AC243236.t00007	LOC_Os05g35240.1	Sb04g022920.1	GRMZM2G127548_P01	Bradi3g43420.1
AC243236.m00008	AC243236.t00008	LOC_Os05g35266.1	Sb04g024620.1	GRMZM2G127548_P01	Bradi3g43420.1
AC243236.m00009	AC243236.t00009	LOC_Os05g35274.5	Sb04g029280.1	GRMZM2G127548_P01	Bradi3g43450.1
AC243237.m00001	AC243237.t00001	LOC_Os05g35274.5	Sb04g029290.1	GRMZM2G129018_P02	Bradi3g43460.1
AC243237.m00002	AC243237.t00002	LOC_Os05g35360.1	Sb04g029290.1	GRMZM2G129405_P01	Bradi3g43460.1
AC243237.m00003	AC243237.t00003	LOC_Os05g40110.1	Sb04g029290.1	GRMZM2G130064_P01	Bradi3g43460.1
AC243237.m00004	AC243237.t00004	LOC_Os05g51500.1	Sb04g029300.1	GRMZM2G132929_P01	Bradi3g44060.1
AC243237.m00005	AC243237.t00005	LOC_Os06g02480.1	Sb04g029360.1	GRMZM2G134628_P01	Bradi3g44070.1
AC243237.m00006	AC243237.t00006	LOC_Os06g06740.1	Sb04g029390.1	GRMZM2G134628_P01	Bradi3g44100.1
AC243237.m00007	AC243237.t00007	LOC_Os06g06760.3	Sb04g029400.1	GRMZM2G134671_P01	Bradi3g44100.1
AC243238.m00001	AC243238.t00001	LOC_Os06g08350.1	Sb04g029410.1	GRMZM2G135782_P02	Bradi3g44130.1
AC243238.m00002	AC243238.t00002	LOC_Os06g09850.3	Sb04g029410.1	GRMZM2G135782_P02	Bradi3g44140.1
AC243238.m00003	AC243238.t00003	LOC_Os06g13120.1	Sb04g029420.1	GRMZM2G135893_P01	Bradi3g45980.1
AC243238.m00004	AC243238.t00004	LOC_Os06g17000.1	Sb04g029420.1	GRMZM2G136139_P01	Bradi3g49230.1
AC243238.m00005	AC243238.t00005	LOC_Os06g17000.1	Sb04g029430.1	GRMZM2G139213_P01	Bradi3g49250.2
AC243238.m00006	AC243238.t00006	LOC_Os06g17390.1	Sb04g029440.1	GRMZM2G139900_P02	Bradi3g51010.1
AC243238.m00007	AC243238.t00007	LOC_Os06g19680.1	Sb04g029450.1	GRMZM2G140915_P01	Bradi3g51350.1
AC243238.m00008	AC243238.t00008	LOC_Os06g19690.1	Sb04g029460.1	GRMZM2G140915_P01	Bradi3g51360.1
AC243238.m00009	AC243238.t00009	LOC_Os06g19730.1	Sb04g029470.1	GRMZM2G142037_P01	Bradi3g51380.1
AC243238.m00010	AC243238.t00010	LOC_Os06g19730.1	Sb04g029480.1	GRMZM2G142249_P01	Bradi3g51400.1
AC243238.m00011	AC243238.t00011	LOC_Os06g19730.1	Sb04g032390.1	GRMZM2G143008_P01	Bradi3g51400.1
AC243238.m00012	AC243238.t00012	LOC_Os06g19730.1	Sb04g032400.1	GRMZM2G143187_P01	Bradi3g51400.1
AC243238.m00013	AC243238.t00013	LOC_Os06g19800.1	Sb04g032420.1	GRMZM2G143213_P02	Bradi3g53620.1
AC243238.m00014	AC243238.t00014	LOC_Os06g22520.1	Sb04g032430.1	GRMZM2G144818_P01	Bradi3g53620.1
AC243239.m00001	AC243239.t00001	LOC_Os06g23730.1	Sb04g032440.1	GRMZM2G145045_P01	Bradi3g54590.1
AC243239.m00002	AC243239.t00002	LOC_Os06g26150.1	Sb04g032440.1	GRMZM2G145045_P01	Bradi3g55020.1
AC243239.m00003	AC243239.t00003	LOC_Os06g35140.1	Sb04g032520.1	GRMZM2G145109_P01	Bradi3g55680.1
AC243239.m00004	AC243239.t00004	LOC_Os06g40960.1	Sb04g036810.1	GRMZM2G145895_P01	Bradi3g56350.1
AC243240.m00001	AC243240.t00001	LOC_Os06g41020.1	Sb04g037550.1	GRMZM2G145944_P01	Bradi3g56370.1
AC243240.m00002	AC243240.t00002	LOC_Os06g41030.1	Sb04g038210.1	GRMZM2G146034_P01	Bradi3g56370.1
AC243240.m00003	AC243240.t00003	LOC_Os06g42890.1	Sb05g001130.1	GRMZM2G146240_P01	Bradi3g56370.1
AC243240.m00004	AC243240.t00004	LOC_Os06g47300.1	Sb05g001460.1	GRMZM2G146240_P02	Bradi3g56380.1
AC243240.m00005	AC243240.t00005	LOC_Os06g47310.1	Sb05g001890.1	GRMZM2G147123_P01	Bradi3g56410.1
AC243240.m00006	AC243240.t00006	LOC_Os06g47320.1	Sb05g005200.1	GRMZM2G147332_P01	Bradi3g56440.1
AC243240.m00007	AC243240.t00007	LOC_Os06g47330.1	Sb05g005700.1	GRMZM2G147422_P01	Bradi3g56440.1
AC243240.m00008	AC243240.t00008	LOC_Os06g47330.1	Sb05g005710.1	GRMZM2G147422_P01	Bradi3g56450.4
AC243240.m00009	AC243240.t00009	LOC_Os06g47340.1	Sb05g007380.1	GRMZM2G147454_P01	Bradi3g56460.1
AC243240.m00010	AC243240.t00010	LOC_Os06g47880.1	Sb05g008500.1	GRMZM2G147459_P01	Bradi3g56480.1
AC243240.m00011	AC243240.t00011	LOC_Os06g48610.1	Sb05g008510.1	GRMZM2G148188_P01	Bradi3g56490.3
AC243240.m00012	AC243240.t00012	LOC_Os06g50110.1	Sb05g008512.1	GRMZM2G148783_P01	Bradi3g56710.1
AC243240.m00013	AC243240.t00013	LOC_Os07g03820.1	Sb05g008512.1	GRMZM2G148783_P01	Bradi3g56710.1
AC243240.m00014	AC243240.t00014	LOC_Os07g03830.1	Sb05g016840.1	GRMZM2G149619_P01	Bradi3g60980.1
AC243240.m00015	AC243240.t00015	LOC_Os07g08460.1	Sb05g022610.1	GRMZM2G150276_P01	Bradi4g00210.1
AC243240.m00016	AC243240.t00016	LOC_Os07g08660.1	Sb05g023230.1	GRMZM2G150674_P01	Bradi4g00300.1
AC243240.m00017	AC243240.t00017	LOC_Os07g10860.1	Sb05g024000.1	GRMZM2G151169_P01	Bradi4g00320.1
AC243241.m00001	AC243241.t00001	LOC_Os07g12060.1	Sb05g024010.1	GRMZM2G151236_P06	Bradi4g00320.1
AC243241.m00002	AC243241.t00002	LOC_Os07g12650.1	Sb05g025070.1	GRMZM2G151564_P01	Bradi4g00320.1
AC243241.m00003	AC243241.t00003	LOC_Os07g12650.3	Sb05g025080.1	GRMZM2G151576_P01	Bradi4g00330.2
AC243241.m00004	AC243241.t00004	LOC_Os07g13890.1	Sb05g025110.1	GRMZM2G151582_P01	Bradi4g00330.4
AC243241.m00005	AC243241.t00005	LOC_Os07g15670.3	Sb05g025120.1	GRMZM2G153292_P08	Bradi4g00330.4
AC243241.m00006	AC243241.t00006	LOC_Os07g15680.1	Sb05g027300.1	GRMZM2G154752_P01	Bradi4g00340.1
AC243241.m00007	AC243241.t00007	LOC_Os07g15880.1	Sb06g003210.1	GRMZM2G154987_P01	Bradi4g00370.1
AC243241.m00008	AC243241.t00007	LOC_Os07g39960.1	Sb06g013920.1	GRMZM2G155087_P01	Bradi4g00370.1
AC243242.m00001	AC243242.t00001	LOC_Os07g39980.1	Sb06g013940.1	GRMZM2G155593_P01	Bradi4g00380.1
AC243242.m00002	AC243242.t00002	LOC_Os07g40000.1	Sb06g015880.1	GRMZM2G155626_P01	Bradi4g00410.1
AC243242.m00003	AC243242.t00003	LOC_Os07g40020.1	Sb06g015930.1	GRMZM2G156490_P01	Bradi4g02230.1
AC243242.m00004	AC243242.t00004	LOC_Os07g40120.1	Sb06g016240.1	GRMZM2G157147_P01	Bradi4g05230.1
AC243242.m00005	AC243242.t00005	LOC_Os07g40150.1	Sb06g016930.1	GRMZM2G159675_P01	Bradi4g05230.1
AC243242.m00006	AC243242.t00006	LOC_Os07g40240.1	Sb06g016947.1	GRMZM2G160853_P01	Bradi4g05280.1
AC243242.m00007	AC243242.t00007	LOC_Os07g40250.1	Sb06g016950.1	GRMZM2G163912_P01	Bradi4g06730.1
AC243242.m00008	AC243242.t00007	LOC_Os07g40320.1	Sb06g016960.1	GRMZM2G164082_P01	Bradi4g08710.1
AC243242.m00009	AC243242.t00008	LOC_Os07g40360.1	Sb06g016970.1	GRMZM2G164352_P05	Bradi4g08720.1
AC243242.m00010	AC243242.t00009	LOC_Os07g42520.1	Sb06g016980.1	GRMZM2G166603_P01	Bradi4g08950.1
AC243242.m00011	AC243242.t00010	LOC_Os07g44540.1	Sb06g016990.1	GRMZM2G166903_P01	Bradi4g12950.1
AC243242.m00012	AC243242.t00011	LOC_Os07g44710.1	Sb06g017000.1	GRMZM2G167932_P02	Bradi4g13230.1
AC243242.m00013	AC243242.t00012	LOC_Os07g45970.1	Sb06g017010.1	GRMZM2G168073_P01	Bradi4g13260.1
AC243243.m00001	AC243243.t00001	LOC_Os07g47120.1	Sb06g017220.1	GRMZM2G169080_P01	Bradi4g13280.1
AC243243.m00002	AC243243.t00002	LOC_Os07g47140.1	Sb06g017260.1	GRMZM2G169173_P01	Bradi4g19690.1
AC243243.m00003	AC243243.t00003	LOC_Os07g47150.2	Sb06g018430.1	GRMZM2G169451_P01	Bradi4g19690.1
AC243243.m00004	AC243243.t00004	LOC_Os07g47180.1	Sb06g020320.1	GRMZM2G169535_P01	Bradi4g21310.1
AC243243.m00005	AC243243.t00005	LOC_Os07g47180.1	Sb06g020373.1	GRMZM2G170628_P01	Bradi4g22030.1
AC243244.m00001	AC243244.t00001	LOC_Os07g47180.1	Sb06g022670.1	GRMZM2G170632_P02	Bradi4g22050.1
AC243244.m00002	AC243244.t00002	LOC_Os07g47210.1	Sb06g022670.1	GRMZM2G172451_P01	Bradi4g22060.1
AC243244.m00003	AC243244.t00003	LOC_Os07g47240.1	Sb06g022680.1	GRMZM2G174449_P01	Bradi4g22060.1
AC243244.m00004	AC243244.t00003	LOC_Os07g47250.3	Sb06g022690.1	GRMZM2G174449_P01	Bradi4g23500.1
AC243245.m00001	AC243245.t00001	LOC_Os07g47270.1	Sb06g022700.1	GRMZM2G175258_P01	Bradi4g23550.1
AC243245.m00002	AC243245.t00002	LOC_Os07g47290.1	Sb06g022700.1	GRMZM2G175258_P01	Bradi4g23630.1
AC243245.m00003	AC243245.t00003	LOC_Os07g47300.1	Sb06g022700.1	GRMZM2G175676_P04	Bradi4g24040.1
AC243245.m00004	AC243245.t00004	LOC_Os07g48490.2	Sb06g022720.1	GRMZM2G175676_P04	Bradi4g24590.1
AC243245.m00005	AC243245.t00005	LOC_Os07g48500.1	Sb06g022730.1	GRMZM2G175860_P02	Bradi4g30380.1
AC243246.m00001	AC243246.t00001	LOC_Os07g49520.1	Sb06g022740.1	GRMZM2G176443_P02	Bradi4g30410.1
AC243246.m00002	AC243246.t00002	LOC_Os08g08140.1	Sb06g024780.1	GRMZM2G176519_P01	Bradi4g31380.1
AC243246.m00003	AC243246.t00003	LOC_Os08g13920.1	Sb06g024790.1	GRMZM2G177110_P01	Bradi4g31380.1
AC243246.m00004	AC243246.t00004	LOC_Os08g18220.1	Sb06g029725.1	GRMZM2G177596_P01	Bradi4g31380.1
AC243246.m00005	AC243246.t00005	LOC_Os08g21840.1	Sb06g029725.1	GRMZM2G177726_P01	Bradi4g31380.1
AC243246.m00006	AC243246.t00006	LOC_Os08g25700.1	Sb06g029725.1	GRMZM2G177928_P01	Bradi4g31450.1
AC243246.m00007	AC243246.t00007	LOC_Os08g26820.1	Sb06g029725.1	GRMZM2G179358_P01	Bradi4g31620.1
AC243246.m00008	AC243246.t00008	LOC_Os08g26820.1	Sb06g029740.1	GRMZM2G181219_P01	Bradi4g31710.1
AC243247.m00001	AC243247.t00001	LOC_Os08g30740.1	Sb07g001530.1	GRMZM2G181284_P01	Bradi4g33830.1
AC243247.m00002	AC243247.t00002	LOC_Os08g31430.1	Sb07g006590.2	GRMZM2G305254_P06	Bradi4g36140.1
AC243247.m00003	AC243247.t00003	LOC_Os08g39160.1	Sb07g012110.1	GRMZM2G306998_P01	Bradi4g36240.1
AC243247.m00004	AC243247.t00004	LOC_Os08g40050.1	Sb07g015690.1	GRMZM2G307561_P03	Bradi4g36240.1
AC243247.m00005	AC243247.t00005	LOC_Os08g41270.1	Sb07g019160.1	GRMZM2G307561_P03	Bradi4g36250.1
AC243247.m00006	AC243247.t00006	LOC_Os08g43470.1	Sb07g019160.1	GRMZM2G307561_P03	Bradi4g36280.1
AC243247.m00007	AC243247.t00007	LOC_Os08g44270.1	Sb07g019510.1	GRMZM2G307600_P01	Bradi4g36290.1
AC243247.m00008	AC243247.t00008	LOC_Os09g07510.2	Sb07g023250.1	GRMZM2G307906_P01	Bradi4g36290.1
AC243247.m00009	AC243247.t00009	LOC_Os09g08190.1	Sb07g024430.1	GRMZM2G309970_P01	Bradi4g36310.1
AC243247.m00010	AC243247.t00010	LOC_Os09g08990.1	Sb07g025780.1	GRMZM2G310410_P01	Bradi4g36330.2
AC243247.m00011	AC243247.t00010	LOC_Os09g22230.1	Sb07g026650.1	GRMZM2G310410_P01	Bradi4g36330.2
AC243247.m00012	AC243247.t00011	LOC_Os09g25090.1	Sb07g026650.1	GRMZM2G312944_P01	Bradi4g36360.1
AC243247.m00013	AC243247.t00012	LOC_Os09g25190.1	Sb07g027670.1	GRMZM2G312997_P01	Bradi4g36800.1
AC243247.m00014	AC243247.t00013	LOC_Os09g27040.1	Sb07g028370.1	GRMZM2G317451_P01	Bradi4g37610.1
AC243247.m00015	AC243247.t00014	LOC_Os09g27500.1	Sb08g001600.1	GRMZM2G317572_P01	Bradi4g37620.1
AC243248.m00001	AC243248.t00001	LOC_Os09g28890.2	Sb08g004250.1	GRMZM2G320023_P01	Bradi4g37630.1
AC243248.m00002	AC243248.t00002	LOC_Os09g31140.1	Sb08g010830.1	GRMZM2G328258_P01	Bradi4g37630.2
AC243248.m00003	AC243248.t00003	LOC_Os09g31458.1	Sb08g016090.1	GRMZM2G330424_P01	Bradi4g37640.1
AC243248.m00004	AC243248.t00004	LOC_Os09g32440.1	Sb08g018990.1	GRMZM2G330751_P01	Bradi4g37650.1
AC243248.m00005	AC243248.t00005	LOC_Os09g36320.1	Sb08g019850.1	GRMZM2G333083_P01	Bradi4g37670.1
AC243248.m00006	AC243248.t00006	LOC_Os09g36340.1	Sb08g020630.1	GRMZM2G333433_P01	Bradi4g37680.1
AC243248.m00007	AC243248.t00007	LOC_Os09g36350.1	Sb08g020630.1	GRMZM2G333433_P01	Bradi4g37690.1
AC243248.m00008	AC243248.t00008	LOC_Os09g36350.1	Sb08g020680.1	GRMZM2G334041_P01	Bradi4g37700.1
AC243248.m00009	AC243248.t00009	LOC_Os09g36360.1	Sb08g020880.1	GRMZM2G336137_P01	Bradi4g37710.1
AC243248.m00010	AC243248.t00010	LOC_Os09g36440.1	Sb08g021650.1	GRMZM2G339562_P01	Bradi4g37710.2
AC243248.m00011	AC243248.t00011	LOC_Os09g36440.1	Sb08g023170.1	GRMZM2G341959_P02	Bradi4g40640.1
AC243248.m00012	AC243248.t00012	LOC_Os09g36450.2	Sb08g023180.1	GRMZM2G347043_P01	Bradi4g41140.1
AC243248.m00013	AC243248.t00013	LOC_Os09g36480.1	Sb08g023200.1	GRMZM2G348914_P01	Bradi4g42180.1
AC243249.m00001	AC243249.t00001	LOC_Os09g36480.1	Sb08g023210.1	GRMZM2G349344_P01	Bradi4g42220.2
AC243249.m00002	AC243249.t00002	LOC_Os09g36490.1	Sb08g023220.1	GRMZM2G358827_P01	Bradi5g01770.1
AC243249.m00003	AC243249.t00003	LOC_Os09g36500.1	Sb08g023230.1	GRMZM2G360439_P01	Bradi5g01770.1
AC243249.m00004	AC243249.t00004	LOC_Os09g38200.1	Sb08g023250.1	GRMZM2G360439_P01	Bradi5g02180.1
AC243249.m00005	AC243249.t00005	LOC_Os09g38420.1	Sb08g023260.1	GRMZM2G362848_P01	Bradi5g02420.1
AC243249.m00006	AC243249.t00006	LOC_Os09g38440.1	Sb08g023300.1	GRMZM2G362904_P01	Bradi5g04060.1
AC243249.m00007	AC243249.t00007	LOC_Os09g38440.1	Sb08g023310.1	GRMZM2G365282_P01	Bradi5g04800.1
AC243249.m00008	AC243249.t00008	LOC_Os09g38450.1	Sb08g023310.1	GRMZM2G365613_P01	Bradi5g08200.1
AC243249.m00009	AC243249.t00009	LOC_Os09g38500.2	Sb08g023310.1	GRMZM2G366698_P01	Bradi5g08230.5
AC243249.m00010	AC243249.t00010	LOC_Os09g38510.1	Sb09g005680.1	GRMZM2G366698_P01	Bradi5g10260.1
AC243249.m00011	AC243249.t00011	LOC_Os09g38520.1	Sb09g005680.1	GRMZM2G366698_P03	Bradi5g10290.1
AC243249.m00012	AC243249.t00012	LOC_Os09g38530.1	Sb09g006050.1	GRMZM2G375856_P01	Bradi5g10300.1
AC243249.m00013	AC243249.t00013	LOC_Os09g38540.1	Sb09g008630.1	GRMZM2G377161_P01	Bradi5g10310.3
AC243249.m00014	AC243249.t00014	LOC_Os09g38550.1	Sb09g008870.1	GRMZM2G381822_P01	Bradi5g10330.1
AC243249.m00015	AC243249.t00015	LOC_Os09g38550.2	Sb09g014000.1	GRMZM2G388045_P01	Bradi5g10330.1
AC243249.m00016	AC243249.t00016	LOC_Os10g01060.1	Sb09g014230.1	GRMZM2G393157_P01	Bradi5g10360.1
AC243249.m00017	AC243249.t00017	LOC_Os10g01750.1	Sb09g020940.1	GRMZM2G393157_P01	Bradi5g10380.1
AC243249.m00018	AC243249.t00018	LOC_Os10g36680.1	Sb09g020940.1	GRMZM2G393157_P01	Bradi5g10390.1
AC243249.m00019	AC243249.t00019	LOC_Os10g36690.4	Sb09g020970.1	GRMZM2G393157_P01	Bradi5g10400.1
AC243249.m00020	AC243249.t00020	LOC_Os10g36703.1	Sb09g021000.1	GRMZM2G394941_P01	Bradi5g11930.1
AC243249.m00021	AC243249.t00021	LOC_Os10g36710.1	Sb09g021040.1	GRMZM2G399325_P01	Bradi5g15770.1
AC243250.m00001	AC243250.t00001	LOC_Os10g37170.1	Sb09g021060.1	GRMZM2G401830_P01	Bradi5g15780.1
AC243250.m00002	AC243250.t00002	LOC_Os10g41780.3	Sb09g021080.1	GRMZM2G406313_P01	Bradi5g15790.1
AC243250.m00003	AC243250.t00003	LOC_Os10g42090.2	Sb09g021090.1	GRMZM2G409213_P01	Bradi5g15800.1
AC243250.m00004	AC243250.t00004	LOC_Os10g42100.1	Sb09g021090.1	GRMZM2G409224_P03	Bradi5g15800.1
AC243250.m00005	AC243250.t00005	LOC_Os10g42110.1	Sb09g021100.1	GRMZM2G409224_P03	Bradi5g15800.1
AC243250.m00006	AC243250.t00006	LOC_Os10g42110.1	Sb09g021110.1	GRMZM2G410338_P01	Bradi5g15810.1
AC243250.m00007	AC243250.t00007	LOC_Os11g06390.6	Sb09g021140.1	GRMZM2G410766_P01	Bradi5g15820.1
AC243250.m00008	AC243250.t00008	LOC_Os11g06460.1	Sb09g025520.1	GRMZM2G411044_P01	Bradi5g18170.1
AC243251.m00001	AC243251.t00001	LOC_Os11g06610.1	Sb09g025520.1	GRMZM2G422576_P03	Bradi5g18230.1
AC243251.m00002	AC243251.t00002	LOC_Os11g06610.1	Sb09g025520.1	GRMZM2G423472_P01	Bradi5g22690.1
AC243251.m00003	AC243251.t00003	LOC_Os11g06780.1	Sb09g027900.1	GRMZM2G423476_P01	Bradi5g22690.1
AC243251.m00004	AC243251.t00004	LOC_Os11g07830.1	Sb10g001250.1	GRMZM2G429540_P01	Bradi5g22930.1
AC243251.m00005	AC243251.t00005	LOC_Os11g08380.1	Sb10g001960.2	GRMZM2G433333_P02	Bradi5g22930.1
AC243251.m00006	AC243251.t00006	LOC_Os11g08400.1	Sb10g004400.1	GRMZM2G435357_P01	Bradi5g22980.1
AC243251.m00007	AC243251.t00007	LOC_Os11g08410.1	Sb10g005340.1	GRMZM2G435357_P01	Bradi5g22980.1
AC243252.m00001	AC243252.t00001	LOC_Os11g11410.1	Sb10g005530.1	GRMZM2G441347_P01	Bradi5g22980.1
AC243252.m00002	AC243252.t00002	LOC_Os11g11410.1	Sb10g009420.1	GRMZM2G448687_P01	Bradi5g24030.3
AC243252.m00003	AC243252.t00003	LOC_Os11g11430.2	Sb10g010730.1	GRMZM2G449875_P01	Bradi5g25640.1
AC243252.m00004	AC243252.t00004	LOC_Os11g11490.1	Sb10g011000.1	GRMZM2G456217_P01	Bradi5g25890.1
AC243252.m00005	AC243252.t00005	LOC_Os11g14220.1	Sb10g011070.1	GRMZM2G457523_P01
AC243252.m00006	AC243252.t00006	LOC_Os11g24110.1	Sb10g011090.1	GRMZM2G457544_P01
AC243252.m00007	AC243252.t00007	LOC_Os11g31020.1	Sb10g011095.1	GRMZM2G461936_P01
AC243252.m00008	AC243252.t00008	LOC_Os11g33260.1	Sb10g021360.1	GRMZM2G461936_P01
AC243252.m00009	AC243252.t00009	LOC_Os11g40590.3	Sb10g022190.1	GRMZM2G467893_P01
AC243252.m00010	AC243252.t00010	LOC_Os11g40600.1	Sb10g022200.1	GRMZM2G469380_P02
AC243252.m00011	AC243252.t00011	LOC_Os11g40610.5	Sb10g024040.1	GRMZM2G474853_P01
AC243252.m00012	AC243252.t00012	LOC_Os11g41120.1	Sb10g024040.1	GRMZM2G475956_P01
AC243253.m00001	AC243253.t00001	LOC_Os11g41390.1	Sb10g024070.1	GRMZM2G485559_P01
AC243253.m00002	AC243253.t00002	LOC_Os11g42630.1	Sb10g024080.1	GRMZM2G571942_P01
AC243253.m00003	AC243253.t00003	LOC_Os11g43700.1	Sb10g025110.1	GRMZM2G703021_P01
AC243253.m00004	AC243253.t00004	LOC_Os12g05920.1	Sb10g025800.1	GRMZM5G800586_P01
AC243253.m00005	AC243253.t00005	LOC_Os12g09530.1	Sb10g025800.1	GRMZM5G800586_P01
AC243253.m00006	AC243253.t00006	LOC_Os12g19960.1	Sb10g027920.1	GRMZM5G808350_P02
AC243253.m00007	AC243253.t00007	LOC_Os12g26020.1	Sb10g027930.1	GRMZM5G809195_P01
AC243253.m00008	AC243253.t00008	LOC_Os12g26290.4	Sb10g027960.1	GRMZM5G824534_P02
AC243253.m00009	AC243253.t00009	LOC_Os12g28210.1	Sb10g027960.1	GRMZM5G825707_P02
AC243253.m00010	AC243253.t00009	LOC_Os12g28210.1	Sb10g027970.1	GRMZM5G825707_P02
AC243253.m00011	AC243253.t00010	LOC_Os12g32200.1	Sb10g027980.1	GRMZM5G843192_P01
AC243253.m00012	AC243253.t00011	LOC_Os12g36270.1	Sb10g028000.1	GRMZM5G852968_P03
AC243253.m00013	AC243253.t00012	LOC_Os12g36400.1	Sb10g028840.1	GRMZM5G854264_P01
AC243254.m00001	AC243254.t00001	LOC_Os12g40419.2		GRMZM5G862817_P04
AC243254.m00002	AC243254.t00002	LOC_Os12g44240.1		GRMZM5G870592_P01
AC243254.m00003	AC243254.t00003	LOC_Os12g44250.1		GRMZM5G873277_P01
AC243254.m00004	AC243254.t00004	LOC_Os12g44300.1		GRMZM5G877647_P01
AC243254.m00005	AC243254.t00005	LOC_Os12g44310.1		GRMZM5G879570_P02
AC243254.m00006	AC243254.t00006	LOC_Os12g44310.1		GRMZM5G885766_P01
AC243254.m00007	AC243254.t00007	LOC_Os12g44310.2
AC243254.m00008	AC243254.t00008	LOC_Os12g44310.2
AC243254.m00009	AC243254.t00009	LOC_Os12g44320.1
AC243254.m00010	AC243254.t00010	LOC_Os12g44370.1
AC243254.m00011	AC243254.t00011	LOC_Os12g44380.1
AC243254.m00012	AC243254.t00012	LOC_Os12g44380.2
AC243254.m00013	AC243254.t00013	LOC_Os12g44380.3
AC243254.m00014	AC243254.t00014
AC243254.m00015	AC243254.t00015
AC243254.m00016	AC243254.t00016
AC243255.m00001	AC243255.t00001
AC243255.m00002	AC243255.t00002
AC243255.m00003	AC243255.t00003
AC243256.m00001	AC243256.t00001
AC243256.m00002	AC243256.t00002
AC243256.m00003	AC243256.t00003
AC243256.m00004	AC243256.t00004
AC243256.m00005	AC243256.t00005
AC243256.m00006	AC243256.t00006
AC243256.m00007	AC243256.t00007
AC243256.m00008	AC243256.t00008
AC243256.m00009	AC243256.t00009
AC243257.m00001	AC243257.t00001
AC243257.m00002	AC243257.t00002
AC243257.m00003	AC243257.t00003
AC243257.m00004	AC243257.t00004
AC243257.m00005	AC243257.t00005
AC243257.m00006	AC243257.t00006
AC243257.m00007	AC243257.t00007
AC243257.m00008	AC243257.t00008
AC243257.m00009	AC243257.t00009
AC243257.m00010	AC243257.t00010
AC243257.m00011	AC243257.t00011
AC243257.m00012	AC243257.t00012
AC243257.m00013	AC243257.t00012
AC243257.m00014	AC243257.t00013
AC243257.m00015	AC243257.t00014
AC243257.m00016	AC243257.t00015
AC243257.m00017	AC243257.t00016
AC243257.m00018	AC243257.t00017
AC243257.m00019	AC243257.t00018
AC243257.m00020	AC243257.t00019
AC243257.m00021	AC243257.t00020
AC243258.m00001	AC243258.t00001
AC243258.m00002	AC243258.t00002
AC243258.m00003	AC243258.t00003
AC243258.m00004	AC243258.t00004
AC243258.m00005	AC243258.t00005
AC243258.m00006	AC243258.t00006
AC243258.m00007	AC243258.t00007
AC243258.m00008	AC243258.t00008
AC243258.m00009	AC243258.t00009
AC243258.m00010	AC243258.t00010
AC243259.m00001	AC243259.t00001
AC243259.m00002	AC243259.t00002
AC243259.m00003	AC243259.t00003
AC243260.m00001	AC243260.t00001
AC243260.m00002	AC243260.t00002
AC243260.m00003	AC243260.t00003
AC243260.m00004	AC243260.t00004
AC243260.m00005	AC243260.t00005
AC243260.m00006	AC243260.t00006
AC243260.m00007	AC243260.t00007
AC243260.m00008	AC243260.t00008
AC243260.m00009	AC243260.t00009
AC243261.m00001	AC243261.t00001
AC243261.m00002	AC243261.t00002
AC243261.m00003	AC243261.t00003
AC243261.m00004	AC243261.t00004
AC243261.m00005	AC243261.t00005
AC243261.m00006	AC243261.t00006
AC243261.m00007	AC243261.t00007
AC243261.m00008	AC243261.t00008
AC243261.m00009	AC243261.t00009
AC243261.m00010	AC243261.t00010
AC243261.m00011	AC243261.t00011
