# Supplementary material for: A Genome-Wide Survey of Switchgrass Genome Structure and Organization
Source: PLoS One. 2012 Apr 12;7(4):e33892. doi: 10.1371/journal.pone.0033892 (PMC3325252; doi:10.1371/journal.pone.0033892)
Supplement: File S9 — Genome characteristics of various plant genomes based upon BAC-end or genome sequence data. (XLS) [file pone.0033892.s010.xls]

## Sheet: Sheet1
Supplemental File S9. Genome characteristics of various plant genomes based upon BAC-end sequence/genome sequence data.
	Gemome Size	Ploidy	Proprotion of genome analyzed*	% GC content	Repeat elements	Most abundant repeat elements	SSR frequency/Kb**	Most abundant SSR type	Reference
Switchgrass	1600	Tetraploid	5.5	45.5	0.333	Ty3/Gypsy	5.4	Trinucleotides	in this article
Brachypodium	350	Diploid	10.9	45.9	0.1099	Ty3/Gypsy	3.9	Trinucleotides	Huo et al. 2008
Rice	490	Diploid	8.33	43.6	35	Ty3/Gypsy	4.3	Trinucleotides	IRGSP 2005, Messing et al. 2004
Wheat (Chr 3B)		Hexaploid	1.1	44.5	0.763	gypsy-like	5.6	Trinculeotides	choulet et al. 2010
Sorghum	697	Diploid		37.7	0.61	gypsy-like	6.4	Trinucleotides	Paterson et al. 2002, 2009; Song 2009
Oak	740	Diploid	~2	35.3	0.059	Ty1/Copia	3.5	Dinucleotides	Rampant et al. 2011
Cucumis melo	454	Diploid	5.7	35.2	0.06	Ty1/Copia	2.6	Mononucleotides	Gonzalez et al. 2010
Dacus carota	473	Diploid	0.3	38.4	14.13	Ty1/Copia	7.6	Trinucleotides	Cavagnaro et al. 2009
Apple	740	Diploid	0.3	39	20.9	Ty1/Copia	-	Dinucleotides	Han et al. 2008
Citrus	367	Diploid	8	39	12.6	gypsy/Copia	5	Dinucleotides	Terol et. Al 2008
Papaya	372	Diploid	4.7	35	16.2	Ty1/Copia	2.2	Dinucleotides	Lai et al. 2006
		*-This referes to percentage of genome sequence analyzed in each study
		**-Average estimated distance (Kb) between SSRs
Cavagnaro PF, Chung SM, Szklarczyk M, Grzebelus D, Senalik D, Atkins AE, Simon PW (2009) Characterization of a deep-coverage carrot (Daucus carota L.) BAC library and initial analysis of BAC-end sequences. Mol Genet Genomics 281:273-288
Choulet F, Wicker T, Rustenholz C, Paux E, Salse J, Leroy P, Schlub S, Le Paslier M, Magdelenat G, Gonthier C, Couloux A, Budak H, Breen J, Pumphrey M, Liu S, Kong X, Jia J, Gut M, Brunel D, Anderson JA, Gill BS, Apples R, Keller B, Feuillet C (2010) Megabase Level Sequencing Reveals Contrasted Organization and Evolution Patterns of the Wheat Gene and Transposable Element Spaces. Plant Cell 22,16…
Gonzalez VM, Rodriguez-Moreno L, Centeno E, Benjak A, Garcia-Mas J, Puigdomenech P, Aranda MA (2010) Genome-wide BAC-end sequencing of Cucumis melo using two BAC libraries. BMC Genomics 11:618
Haberer G, Young S, Bharti AK, Gundlach H, Raymond C, Fuks G, Butler E, Wing RA, Rounsley S, Birren B, Nusbaum C, Mayer KF, Messing J (2005) Structure and architecture of the maize genome. Plant Physiol 139:1612-1624
Han Y, Korban SS (2008). An overview of the apple genome throught BAC end sequence analysis
Huo N, Lazo GR, Vogel JP, You FM, Ma Y, Hayden DM, Coleman-Derr D, Hill TA, Dvorak J, Anderson OD, Luo M, Gu YQ (2008) The nuclear genome of Brachypodium distachyon: analysis of BAC end sequences. Funct integr Genomics 8:135-147.
International Rice Genome Sequencing Project (2005) The map-based sequence of the rice genome. Nature 436: 793Ð800
Lai CWJ, Yu Q, Hou S, Skelton RL, Jones MR, Lewis KLT, Murray J, Eustice M, Guan P, Agbayani R, Moore PH, Ming R, Presting GG:Analysis of papaya BAC end sequences reveals first insights into the organization of a fruit tree genome. Mol Gen Genomics 2006, 276:1-12
Paterson, et al. (2009) The Sorghum bicolor genome and the diversification of grasses. Nature 457, 551-556.
Rampant, PF, Lesur, I, Boussardon C, Bitton F, Martin-Magniette M, Bodenes C, Provost GL, Berges H, Fluch S, Kremer A, Plomion C (2011) Analysis of BAC end sequences in oak, a keystone forest tree species, providing insight into the composition of its genome. BMC Genomics, 12:292
Song, J (2009) Genome-wide in silico analysis of Microsatellites in Sorghum bicolor. International Conference on Future Biomedical Information Engineering
Terol J, Naranjo MA, Ollitrault P, Talon M (2008) Development of genomic resources for Citrus clementina: characterizatio n of three deep-coverage BAC libraries and analysis of 46,000 BAC end sequence. BMC genomics, 9:423

## Sheet: Sheet2
Genome charactersticks base upon BAC end sequence data or genome sequence data
	Gemome Size	Ploidy	Proprotion of genome	% GC content	Repeat Elements	Most abundant repeat elements	SSR frequency/Kb*	Most abundant SSR type	Gene Density	Total number of genes	Reference
Switchgrass	3200	Tetraploid	5.5	45.5	0.2563	Ty3/Gypsy	5.4	Trinucleotides			in this article
Brachypodium	350	Diploid	10.9	45.9	0.1099	Ty3/Gypsy	3.9	Trinucleotides			Huo et al. 2008
Rice	490	diploid	8.33	43.6	35	Ty3/Gypsy	4.3	Trinucleotides			IRGSP 2005	Messing et al. 2004- Maize paper
Wheat (Chr 3B)		Hexaploid	1.1	-	0.763	gypsy-like	5.6	Trinculeotides
Sorghum	697	diploid			0.61	gypsy-like		Trinucleotides			Paterson et al. 2009 The Sorghum bicolor genome and the diversification of grasses
Oak	740	Diploid	~2	35.3	0.059	Ty1/Copia	3.5	Dinucleotides			Rampant et al. 2011
Cucumis melo	454	Diploid	5.7	35.2	0.06	Ty1/Copia	2.6	Mononucleotides			Gonzalez et al. 2010
Soyabean	975		243 MB				3.7	Tetranucleotides			Cavagnaro et al. 2009
Dacus carota	473		0.3	38.4	14.13	Ty1/Copia	7.6	Trinucleotides			Cavagnaro et al. 2009
Apple	740	diploid	0.3	39	20.9	Ty1/Copia		Dinucleotides			Han et al. 2008
Citrus	367	Diploid	8	39	12.6	gypsy/Copia	5	Dinucleotides			Terol et. Al 2008
Papaya	372		4.7	35	16.2	Ty1/Copia	2.2	Dinucleotides			Lai et al. 2006
Maize	2500						8.3	Trinucleotides			Messing et al. 2004
Arabidopsis	157	Diploid					4.1	Trinucleotides
Populus	480		10.8
Lai CWJ, Yu Q, Hou S, Skelton RL, Jones MR, Lewis KLT, Murray J, Eustice M, Guan P, Agbayani R, Moore PH, Ming R, Presting GG:Analysis of papaya BAC end sequences reveals first insights into the organization of a fruit tree genome. Mol Gen Genomics 2006, 276:1-12
Han Y, Korban SS (2008). An overview of the apple genome throught BAC end sequence analysis
Rampant, PF, Lesur, I, Boussardon C, Bitton F, Martin-Magniette M, Bodenes C, Provost GL, Berges H, Fluch S, Kremer A, Plomion C (2011) Analysis of BAC end sequences in oak, a keystone forest tree species, providing insight into the composition of its genome. BMC Genomics, 12:292
Terol J, Naranjo MA, Ollitrault P, Talon M (2008) Development of genomic resources for Citrus clementina: characterizatio n of three deep-coverage BAC libraries and analysis of 46,000 BAC end sequence. BMC genomics, 9:423
