# Supplementary material for: A Genome-Wide Survey of Switchgrass Genome Structure and Organization
Source: PLoS One. 2012 Apr 12;7(4):e33892. doi: 10.1371/journal.pone.0033892 (PMC3325252; doi:10.1371/journal.pone.0033892)
Supplement: File S10 — List of primers used for BAC library characterization and Southern hybridizations. (DOC) [file pone.0033892.s011.doc]

**Supplemental table S10**. List of primers used for BAC library characterization and Southern hybridizations.

|  | **Name** | **Primer** | **Sequence** |
| --- | --- | --- | --- |
| Chloroplast-specific genes | *rbcL* | For | 5-TACTTCCATTGTGGGTAACGTAT-3 |
| Rev | 5-AGATACCGCGAGAACGATCT-3 |
| *ndhA* | For | 5-TAACTTTTTGTGTACTAGCAATATCTC-3 |
| Rev | 5-CTGTGCTTCAACTATATCAACTGT-3 |
| *rpoB* | For | 5-ATATGGGCTCGCGTGAGT-3 |
| Rev | 5-GACAAATACGCCCATAGTGA-3 |
| *trnL* | For | 5-GGACTTGATATGTATTGAGCCT-3 |
| Rev | 5-TAAAGTCGACGGATTTTCCT-3 |
| Mitochondria-specific genes | *atp6* | For | 5-CAAATGCATGGCAATCCTT-3 |
| Rev | 5-TGAGCTTGTGATATAGCTACACCT-3 |
| *atp9* | For | 5-AGGAAAAGCGCGAAACAAT-3 |
| Rev | 5-GACCAATGTGTATACGCACCA-3 |
| *cob* | For | 5-AGCGCCATACCAGTAGTAGGA-3 |
| Rev | 5-ATGGGCGTTATGGCAAAGA-3 |
| *cox1* | For | 5-TCTATGCATAGTCATTCCAGGT-3 |
| Rev | 5-CTAGTTTGAAGTTCTCCTTGAGT-3 |
| Single or low copy genes | *BC10* | For | 5-TGCACCAACCTAGGTACTAAAAGA-3 |
| Rev | 5-ACTATGTTCAGACATTGCTTGCA-3 |
| *Os_XTH* | For | 5-CGGACTCGTGGCTGTAC-3 |
| Rev | 5-ACTTTCACCTTCCCCTGCT-3 |
| *Maize opaque* | For | 5-AGAGAATCAGCCAGACGCT-3 |
| Rev | 5-GCAGTGCCTAATACATGTCCA-3 |
| *SBE1* | For | 5-ACTCACACGCCGTCACAAT-3 |
| Rev | 5-TTGGGGTCCAGGTCGTATA-3 |
| *Tubulin-4* | For | 5-ACAACTTCGTCTACGGCCAGT-3 |
| Rev | 5-CTTGGCGTCCCACATCTGCT-3 |
| *TB1* | For | 5-TCTCACGCTCACGCTCACA-3 |
| Rev | 5-ACGCGTCGTCTGTCATGATCT-3 |
